# Supplementary material for: Molecular Characterization and Clinical Relevance of m6A Regulators in Metastatic Prostate Cancer
Source: Research Square preprint supplement (doi:10.21203/rs.3.rs-966723/v1), 2021-11-09
Supplement: Supplementary file 1 [file a4f8f4748a422162d306ceda.csv]

ID	Description	GeneRatio	BgRatio	pvalue	p.adjust	qvalue	geneID	Count
hsa03040	Spliceosome	67/1023	149/8040	1.03877496284279e-22	3.04361064112938e-20	2.51492885740887e-20	3190/23020/9879/10992/988/3178/51340/11338/4670/9410/1665/11325/22938/10523/6426/27339/10291/10929/9775/5093/24148/10594/27316/9939/26121/9343/3183/3192/10946/11017/84950/9128/1659/220988/55660/25949/10772/9716/51362/23450/8683/3312/9416/6428/22916/6631/56949/494115/84991/10569/6626/10262/10286/6636/55696/4116/6427/6635/10285/4686/57187/6431/51729/23451/23350/8559/6627	67
hsa03013	RNA transport	70/1023	180/8040	2.53330408168107e-19	3.71129047966277e-17	3.06663125677182e-17	3837/22794/9972/8668/10419/81929/10921/5976/8665/1983/9775/23511/9939/50628/23279/55746/57510/1975/8672/348995/25929/1967/8480/8664/1977/10605/1973/6613/11102/9631/1982/22916/54960/1915/23191/96764/129401/4928/5903/1965/9513/8087/23636/23165/59343/51808/1981/11260/7329/8661/8662/1207/10250/9669/23225/57122/8666/7341/8667/1968/4116/11218/8086/11171/4686/57187/8021/10940/2332/10073	70
hsa03015	mRNA surveillance pathway	41/1023	91/8040	2.13741717408869e-14	2.08754410669329e-12	1.72493315803649e-12	5528/5515/1477/22794/10921/5976/80335/9887/9775/5529/10914/53981/9939/11052/124540/5501/55339/5500/10978/64895/8731/10767/2935/79869/22916/53918/1478/2107/5518/26528/11051/81608/5527/29101/10250/51585/4116/51692/10898/4686/23283	41
hsa04120	Ubiquitin mediated proteolysis	48/1023	140/8040	2.74242241486425e-11	2.00882441888806e-09	1.65988725110205e-09	8697/27339/65264/8452/4591/9354/54926/9040/51465/64750/10277/7323/55585/10054/7428/10055/7326/55958/9320/10075/7328/22954/8450/23291/9690/25898/118424/3093/7329/8454/8916/55236/7322/8065/64682/7337/8453/6500/8554/9817/89910/22888/996/7334/1642/10477/51588/25847	48
hsa04141	Protein processing in endoplasmic reticulum	49/1023	167/8040	7.31749169182717e-09	4.28805013141072e-07	3.54320650341105e-07	5887/29979/3326/9373/10427/80331/10483/2081/3703/51465/11231/5589/54431/10277/27102/1650/7323/3312/23193/29978/1388/4287/5599/7326/3301/5610/6048/1965/10294/821/3309/118424/10130/3320/8454/7322/51360/6185/55968/2923/7415/5601/10525/6500/440275/56893/6745/23640/9451	49
hsa03018	RNA degradation	28/1023	79/8040	1.7417023412932e-07	8.50531309998179e-06	7.02792172802519e-06	22803/3313/57472/9652/80153/115752/55802/246175/9337/1656/10140/3329/23019/4850/5394/219988/51010/22894/2023/23404/255967/87178/5393/5213/170506/4848/5073/23644	28
hsa04137	Mitophagy - animal	23/1023	68/8040	5.45930306211512e-06	0.00022851082817139	0.000188818000644583	1457/5970/55288/84749/9101/10241/6667/4077/8678/79065/192111/5599/1460/9927/1459/22800/5601/10370/64786/3845/23786/2309/9451	23
hsa04144	Endocytosis	55/1023	247/8040	1.67842431696148e-05	0.000614722906087141	0.000507944201185711	9798/382/60682/10617/5869/10890/9101/5867/51652/55737/10015/51534/163/147179/64750/57403/8723/3312/8766/8976/5878/3799/7251/8853/8394/58513/832/28964/84364/829/11021/10254/9372/25978/22905/5868/8027/375/10564/57132/9135/10193/387/5584/11267/29924/81873/9525/116987/377/2060/3800/27183/1173/1213	55
hsa00020	Citrate cycle (TCA cycle)	13/1023	30/8040	3.13954821332886e-05	0.00102209736278373	0.000844556829316537	3419/1737/1431/1738/1743/4191/3420/4967/47/2271/6390/5162/8803	13
hsa03430	Mismatch repair	11/1023	23/8040	4.21407946910732e-05	0.00112898093687352	0.000932874494273069	2956/5425/4436/6117/5981/4292/6118/5983/10714/4437/5985	11
hsa05210	Colorectal cancer	25/1023	86/8040	4.23849498484938e-05	0.00112898093687352	0.000932874494273069	26060/2956/6198/2885/2932/4436/5594/5898/4089/6654/5599/2475/4292/5894/5900/207/5604/5601/387/4437/4609/3845/10018/6199/5879	25
hsa03050	Proteasome	16/1023	46/8040	9.9619509686328e-05	0.00243237636150784	0.00200986730068907	5713/9861/5717/10197/11047/5718/5705/5709/5701/5693/5706/9491/5707/5690/5704/5695	16
hsa04520	Adherens junction	21/1023	71/8040	0.00013031135945917	0.00279274225445766	0.00230763685477011	1457/1495/1500/71/1387/5594/2033/117178/4089/10810/8976/5770/1460/10163/7525/1459/7082/8936/387/5792/5879	21
hsa03420	Nucleotide excision repair	16/1023	47/8040	0.000133441609428011	0.00279274225445766	0.00230763685477011	5887/5425/6117/2965/2071/5981/54107/2967/8450/2074/6118/5983/2072/10714/5985/1642	16
hsa04140	Autophagy - animal	33/1023	137/8040	0.000174519561342526	0.00340894876489067	0.00281680695500217	5515/6198/2081/5170/140775/9706/5594/8678/55102/79065/5599/2475/5562/1965/26100/5894/5580/207/5563/7248/5604/64223/22800/5601/5861/5566/10670/3845/9776/440275/6199/84335/9451	33
hsa04962	Vasopressin-regulated water reabsorption	15/1023	44/8040	0.000211435022315977	0.0037991571194091	0.0031392352702141	140735/84516/1385/51164/5869/1781/4905/10540/8766/5878/5868/51143/5566/396/1783	15
hsa03020	RNA polymerase	12/1023	31/8040	0.000233377309302554	0.0037991571194091	0.0031392352702141	84172/5431/5433/25885/55703/64425/10621/5434/5430/221830/55718/5432	12
hsa04910	Insulin signaling pathway	33/1023	139/8040	0.000233395317915918	0.0037991571194091	0.0031392352702141	6198/5573/5501/5170/2885/2932/5500/808/1977/31/5594/5576/6654/1399/5599/5770/2475/5562/5894/207/5563/7248/5604/1398/5601/5566/5792/5584/3845/2002/6199/5255/5140	33
hsa03008	Ribosome biogenesis in eukaryotes	28/1023	112/8040	0.000274684856128023	0.00423592962344793	0.0035001394409665	1457/22803/1736/10885/23160/134430/9790/84135/28987/51096/51077/1460/84128/83732/2091/55226/10528/9724/23560/10813/1459/10199/55127/92856/6949/26354/10940/54433	28
hsa04919	Thyroid hormone signaling pathway	29/1023	121/8040	0.000462332264471017	0.0067731676745004	0.00559665372780705	5469/9440/3066/25942/3065/5170/2932/71/1387/5594/2033/476/8841/23389/2475/5332/7067/5894/207/9969/5604/5213/10499/8648/5566/4609/3845/9442/10025	29
hsa05211	Renal cell carcinoma	19/1023	69/8040	0.000727210487913245	0.0101463177599324	0.00838388031178177	5781/2885/1387/5594/2033/5062/7428/6654/5546/1399/2271/5894/207/54583/5604/1398/8453/3845/5879	19
hsa04722	Neurotrophin signaling pathway	28/1023	119/8040	0.000786343348983053	0.0104726636932743	0.00865353924718193	5970/57498/5781/25/5170/2885/2932/808/5663/5594/7531/6654/1399/5599/10818/5894/5580/11108/207/10782/5604/1398/5601/387/396/3845/2309/5879	28
hsa04340	Hedgehog signaling pathway	15/1023	50/8040	0.000989610486402749	0.0122511418438401	0.0101230918774321	8405/1453/8452/11127/2932/64750/53944/1452/339745/23291/8454/5566/1454/1954/1455	15
hsa05017	Spinocerebellar ataxia	24/1023	98/8040	0.00100350649915414	0.0122511418438401	0.0101230918774321	23369/9698/4976/10939/4800/2081/9706/6667/10524/8678/2776/55102/4287/5599/6908/2475/26100/5332/10528/207/3516/25814/5601/9776	24
hsa03030	DNA replication	12/1023	36/8040	0.00112852178443601	0.01322627531359	0.0109288425440119	5425/6117/5981/54107/6118/5983/4176/10714/2237/4173/5985/5422	12
hsa03060	Protein export	9/1023	23/8040	0.00129905181247948	0.0146393146560188	0.0120964338813879	6730/6731/11231/6729/6727/3309/5018/9789/6726	9
hsa04110	Cell cycle	28/1023	124/8040	0.00154362406377676	0.016751179655059	0.0138414633399086	8697/3066/4999/9126/3065/8243/25/7532/2932/1387/2033/7531/10971/7529/1017/4089/10735/5885/8454/64682/4176/4173/6500/5591/1871/4609/996/25847	28
hsa04012	ErbB signaling pathway	21/1023	85/8040	0.00180156705741536	0.0182189315376815	0.0150542635303278	6198/25/2885/2932/5594/5062/6654/1399/5599/2475/5894/207/5604/1398/5601/5747/4609/3845/2002/4690/6199	21
hsa03410	Base excision repair	11/1023	33/8040	0.00180323895765448	0.0182189315376815	0.0150542635303278	142/328/5425/3980/54107/7374/10038/6996/10714/2237/7515	11
hsa03022	Basal transcription factors	13/1023	45/8040	0.00307068227558416	0.029990330224872	0.0247809446801529	6874/2962/2957/27097/2965/2071/8148/6908/2967/2969/6873/129685/6878	13
hsa03450	Non-homologous end-joining	6/1023	13/8040	0.00323822160117645	0.0300829319137542	0.0248574612544044	7520/10111/79840/2547/2237/5591	6
hsa04211	Longevity regulating pathway	21/1023	89/8040	0.00328550792232127	0.0300829319137542	0.0248574612544044	26060/6198/1386/1385/5970/1977/1388/2475/79602/79813/5562/207/5563/7248/23411/5566/3845/2309/9776/6199/84335	21
hsa04114	Oocyte meiosis	27/1023	128/8040	0.00509316235128154	0.0452211081492573	0.0373661033746333	5528/8697/5515/5529/9126/8243/5501/7532/5500/808/5594/7531/10971/7529/1017/5534/23291/5518/8454/5527/5604/64682/5530/5566/6500/996/25847	27
