# Supplementary material for: Molecular Characterization and Clinical Relevance of m6A Regulators in Metastatic Prostate Cancer
Source: Research Square preprint supplement (doi:10.21203/rs.3.rs-966723/v1), 2021-11-09
Supplement: Supplementary file 2 [file e6cdd7ec2acb07526b40cd8a.xlsx]

## Sheet: SupplementaryTable5_GSVA
Column1	Column2	Column3	Column4	Column5	Column6	Column7	Column8	Column9	Column10	Column11	Column12	Column13	Column14	Column15	Column16	Column17	Column18	Column19	Column20	Column21	Column22	Column23	Column24	Column25	Column26	Column27	Column28	Column29	Column30	Column31	Column32	Column33	Column34	Column35	Column36	Column37	Column38	Column39	Column40	Column41	Column42	Column43	Column44	Column45	Column46	Column47	Column48	Column49	Column50
WCMC0_5_N	WCMC0_6_N	WCMC0_8_N	WCMC0_1_N	WCMC0_9_N	WCMC0_10_N	WCMC119_1_C	WCMC11_1_C	WCMC12_2_N	WCMC131_1_C	WCMC139_1_C	WCMC14_1_C	WCMC155_1_N	WCMC158_1_C	WCMC159_1_C	WCMC159_5_C	WCMC159_6_C	WCMC159_2_C	WCMC159_3_C	WCMC161_1_C	WCMC162_1_C	WCMC163_1_N	WCMC164_1_C	WCMC169_1_C	WCMC170_1_C	WCMC172_1_C	WCMC187_1_C	WCMC188_1_C	WCMC189_1_C	WCMC192_1_N	WCMC195_1_C	WCMC210_1_N	WCMC212_1_N	WCMC252_1_N	WCMC2_1_C	WCMC4_1_C	WCMC59_1_C	WCMC63_1_C	WCMC89_1_C	WCMC90_4_C	WCMC90_2_C	WCMC90_3_C	WCMC90_5_C	WCMC90_1_C	WCMC91_1_C	WCMC9_1_C	WCMC9_2_C	WCMC4240_1_N	WCMC7520_1_N	WA10
KEGG_GLYCOLYSIS_GLUCONEOGENESIS	-0.216316498462338	-0.195741190077223	-0.260551305770667	-0.264625599082579	-0.338574394385954	-0.287748733953032	-0.175828879981621	-0.325480603962467	-0.234018267791001	-0.208306479703575	-0.167719076005785	-0.217751552110714	0.498510213826384	0.183184334935441	0.314854407925401	0.186616184691525	-0.152757464352759	-0.170429165347914	0.217979664531841	0.187531353252418	0.169666916222879	0.390170876589112	0.262111997170673	0.316255644265352	0.165274803423439	0.176235962677596	-0.277442901194874	-0.102207127039553	-0.297882065544988	-0.236722010870695	-0.133791672510005	0.192811191297962	-0.200316124589532	-0.162873213115408	0.339948087262351	-0.317039408097185	0.299166031603178	0.141930594881728	-0.182103024738363	0.199238775190247	0.182937768260454	0.419667986179307	0.2046931680277	0.243688298587416	-0.195408503044372	0.263624481751944	-0.250349708392027	0.344314746617305	0.296808802012668
KEGG_CITRATE_CYCLE_TCA_CYCLE	-0.228798203129467	0.267819412615585	-0.189856020094332	-0.20874341968656	0.208068781667674	0.156282062592696	0.602152543655826	-0.234364086608667	0.197917328084308	-0.53975279329406	-0.348547569205517	-0.589529509099311	0.658487225308219	-0.296145787034104	-0.495816085462824	-0.286914909727484	-0.478929150451821	-0.484890037312144	-0.210283174909529	0.340410717565956	0.376867971601957	0.456214609102925	-0.524667055201176	0.36304180495871	0.270425093946824	-0.217982094101208	0.19969983147447	0.440360092961585	0.227732676085216	-0.62451394512515	0.374594177433165	-0.416172227019523	-0.45541083636121	0.276033382747447	0.52363981470402	0.11726553784689	0.556702359635592	0.420140121839521	0.507013407489375	-0.589788989386727	-0.644419926976336	0.177696749254112	0.321247873879012	-0.481226758664132	-0.319472138034106	0.477922626931552	-0.593452940111923	0.212370100537384	0.453799350217999
KEGG_PENTOSE_PHOSPHATE_PATHWAY	-0.311818256906415	-0.227194776174331	-0.234744877832425	-0.292625061049085	-0.273944808273432	-0.296143907189826	-0.205067866821592	-0.414303394407502	-0.209480963586295	0.273668060371276	0.20751468684443	-0.238358687119699	0.390838340816383	0.360942913596744	0.217585727936575	-0.175915930970395	-0.17620586381447	-0.295674440403766	0.17833724255345	0.213106007886229	-0.156859010982032	0.254141125592876	0.25999063204334	0.178504226523304	0.433777101752658	0.320771618877466	-0.413816991941677	0.245074719505052	-0.198572805843088	-0.337463849749812	0.312427893455105	0.223937088173345	-0.301737167956987	-0.265117236320319	0.328110417879741	-0.413783455324498	0.524678384522684	-0.217791400222716	0.204707677130556	0.211931932902432	-0.125323320975303	0.495981897732185	-0.161145231881166	0.199001822669994	-0.313151612777876	0.416319056873743	-0.334135541845869	0.290522528877344	0.369274909903597
KEGG_PENTOSE_AND_GLUCURONATE_INTERCONVERSIONS	-0.271877703463126	-0.324148752076259	-0.413102080224162	-0.46669752550412	-0.436889050736196	-0.46315195464178	-0.269406353197773	-0.531971006337512	-0.439794451886378	0.34090342858685	0.398680516472998	0.386248214963854	0.762660835632373	-0.31488519863941	0.440916392881462	0.377941653376398	0.288023359068102	0.411455007788235	0.273771741074235	-0.224920642262394	-0.336410704526704	0.741658799016184	0.551969171695713	-0.438506256430872	-0.267891831029421	0.238521770648756	-0.447136763812334	0.232079185043749	-0.253189006237225	0.365144408692119	-0.234151673541952	0.348352596132417	0.439174092755037	0.319449469476675	0.22827238655552	-0.353708733718318	0.325985285826003	-0.336745224280628	0.232197526550438	0.339797070971693	0.193306104305506	0.536810830306209	0.431724300619674	0.455926723527181	0.360006502673716	0.426363595558509	0.276519590762078	-0.323860938512359	-0.253499403529711
KEGG_FRUCTOSE_AND_MANNOSE_METABOLISM	-0.126806973543051	0.170851279048827	0.153343700979648	-0.27773198887434	-0.309052688999288	-0.263733693227997	0.310178688001403	-0.154695144707988	0.216244724389941	-0.308861151039909	-0.273643753554384	-0.396563097301373	-0.223348255418388	0.173414581454889	0.150609656203724	0.383382468164429	-0.247140198207408	0.226441862204855	0.423527698579303	-0.242326465937297	0.300348122369155	-0.363643412057461	-0.319744143436419	0.353315262051693	0.173134979797354	-0.179829637069804	-0.2466544143447	0.185122340949469	-0.297214503983861	-0.448906762093055	-0.159982831273716	-0.212438993467668	-0.325055910236335	0.213869174392805	0.423292813136286	-0.249595265524999	0.299577940336843	0.260836142249792	0.368165689680989	0.337097301291947	-0.244085390686877	0.457413688456624	0.208886386389955	0.19270330574958	-0.376515811048767	0.332361045277239	-0.480824203754464	0.422669200894352	0.384862958806422
KEGG_GALACTOSE_METABOLISM	0.191071747884378	0.276069179744805	0.150710652965507	-0.190003536357861	-0.192601939419951	-0.216334013816005	-0.194930447376978	-0.305666508191004	-0.178569568555641	0.212938263969583	-0.344452998243918	-0.324362816309515	0.343755579441143	-0.199800185154488	-0.24937793579878	-0.253327764806501	0.169781354117173	-0.226350631687901	-0.244823240241409	0.158957377898469	0.256420551828021	0.371088269154314	0.229876029592997	0.316310828232594	0.181544372296296	0.25777926975746	-0.411081508952046	-0.291572601488605	-0.312639072129784	-0.258122493668536	-0.309992133968324	-0.282151262190291	-0.45312744731535	-0.181687223794631	0.363990688337333	-0.178177518266167	0.220202922954049	-0.239447251789445	0.309322751572381	0.221046406833182	0.147577075413747	0.355331062613669	0.337103422883173	0.171627574186756	-0.382799005939374	0.211113113187668	-0.394542435790919	0.516037548412619	0.245319183867718
KEGG_ASCORBATE_AND_ALDARATE_METABOLISM	-0.458121801395901	-0.522018169306245	-0.53713928436929	-0.576200618757029	-0.618128705145251	-0.590607102021506	-0.232567401131123	-0.431730216240837	-0.554517281841425	0.16881775969284	0.443195716448527	0.48975647053724	0.850362895670688	-0.433135559344601	0.598973072312417	0.582175230595168	0.515661310310312	0.64239464293963	0.539550675581038	0.214894650822492	-0.427613330110012	0.811452352935937	0.477786006135997	-0.339535171738578	-0.426374933046107	0.19385392902091	-0.361174482043284	0.143320100727185	-0.306583456499737	0.391601792591673	0.284728915279308	0.402234974739103	0.175273957168184	0.507638463709852	-0.167719033637199	-0.450452143497368	0.266927383656234	-0.285711747774373	-0.365715316017175	0.268019698475288	-0.266400203019925	0.518968429346738	0.261062020669338	0.397591082837941	0.391209107575116	0.419786104773272	0.368613298674015	-0.47754813258233	-0.274990564337001
KEGG_FATTY_ACID_METABOLISM	-0.364958252527213	-0.307152373676215	-0.361916703243415	-0.203455670393172	-0.322339461247193	-0.258714595096281	0.142798073522105	-0.184288573739586	-0.442969820595392	-0.187408152049449	0.264743125178145	0.142657431530799	0.803750182692544	0.175448762586904	0.240505231144688	0.291168577801903	0.168651424585076	0.238722899470553	0.285441204311486	0.165066072374987	-0.116410738837339	0.713950903885414	0.229433289980259	0.155446214561114	0.152753093353291	0.219591980701548	0.267124640284957	0.192787712753388	-0.192347551295145	-0.162429014123181	0.151772064257343	-0.163980852922905	-0.316454399816786	0.386757944891532	0.301924085045058	-0.290477150177641	0.252166217189969	0.359120118197635	-0.182410687297707	-0.164801116788517	-0.140652716424176	0.540558044892842	0.343007249300075	0.26434472321585	0.250773388054494	0.222252523557993	-0.152390777035473	-0.323309221506404	-0.171046996023192
KEGG_STEROID_BIOSYNTHESIS	0.232070855313209	0.267457942094235	-0.405106510997782	-0.226757258950731	-0.211974856899053	-0.28393239592687	0.352748476288414	-0.350720881430069	0.365936665302151	-0.614880349309109	0.385256597581718	-0.641121929143466	0.600333787894212	-0.590063046451945	0.198850018334562	0.328247153098865	0.153219498317475	-0.144452198185626	0.369488853321055	0.254262820006641	0.378793202462901	0.334876179115077	-0.590181839705971	-0.399543870633428	-0.494861496751974	-0.466250948565673	-0.339764545813654	0.361467416551244	0.432822444279885	-0.403872228962437	0.344353924964551	-0.161593461100205	-0.274099627231292	0.293424188539131	0.612876769539712	-0.288593312988717	0.423491518566425	0.412473552980516	0.501272588082783	0.189966176326761	-0.275962697456052	0.492128519583501	0.272233804859424	-0.165165809338255	0.312228306794405	0.248337631490872	-0.474193244447892	0.329970770063552	-0.20023135807007
KEGG_PRIMARY_BILE_ACID_BIOSYNTHESIS	-0.357882352595519	-0.40778982677591	-0.519003381372461	-0.252105015223481	-0.430712337280257	-0.336860218186253	-0.187892005780967	-0.293986643649745	-0.336433096821946	-0.217534733236051	0.610944137366733	0.400376970507797	0.808472778604668	-0.509573614789204	0.502123212360181	0.551777934639846	0.430489074794161	0.579723145202154	0.535064299159145	0.260459489763935	-0.375473869098565	0.805834203998573	0.478018153843617	-0.250907832873864	-0.487686238226283	0.164569969110351	-0.258974302122089	0.183854276084062	-0.573659673182714	0.417082015874283	-0.311222073718704	0.246777996521299	0.341082668766957	-0.281376952468872	0.271181401116137	-0.301856482134826	-0.404496710223701	-0.127711028677291	0.201918540570473	0.313183971104289	0.281904154516158	0.590791476105735	0.358602525176483	0.419632861483361	0.375569519596357	-0.33978498308478	0.346744422663156	-0.331746711330052	-0.355445288027296
KEGG_STEROID_HORMONE_BIOSYNTHESIS	-0.206959238733154	-0.300044164367524	-0.408861223209689	-0.373952508873003	-0.425439281363607	-0.439540613837053	-0.465403957222185	-0.423879134091764	-0.318096932974205	0.256483310685493	0.355671324839394	0.403287250256395	0.758516612358525	-0.376033055799446	0.581549023824036	0.477114903726013	0.513688605458944	0.507524209035987	0.399228199984621	-0.273731661463717	-0.360303272511265	0.653020510168251	0.42689757652644	-0.317908809154547	-0.326894034049482	0.168614397310067	-0.443079222820076	-0.275855462358892	-0.422840752470429	0.454717226671331	-0.318285771158087	0.359036464050525	0.335790953633726	0.329721486488409	-0.243379048390681	-0.407828460389297	-0.249955989471222	-0.28469350366111	-0.310237968882103	0.387862693357928	0.380456018625131	0.464151210475049	0.217259607273404	0.404086364553863	0.261974208372097	0.250100774181837	0.388031676251055	-0.252727016986198	-0.30709561980724
KEGG_OXIDATIVE_PHOSPHORYLATION	0.148394443714861	0.243959986427793	0.199142723808946	0.17081548664751	0.262431067050242	0.144690348113165	0.462371417743315	-0.140808422460971	0.296473188286147	-0.608599030695959	-0.455053166603097	-0.656342867101561	0.493049983321679	-0.105668702691479	-0.538621618069482	-0.534098348044196	-0.576631215566561	-0.573205678418797	-0.431769317161371	0.338363639124899	0.546613649558371	-0.166452532365227	-0.393200650259641	0.310815987706931	0.292286972315264	0.143181544625384	0.298233668899703	0.509983835267023	0.346561469468065	-0.578183805385236	0.509398861742467	-0.538770925734151	-0.416919434415512	0.305046637234933	0.466928350361381	0.378575592860232	0.355751877405676	0.400066164657923	0.406407891912447	-0.585148123937102	-0.615840058486256	-0.3674366973601	-0.357105410066577	-0.571623086182556	-0.39609466082141	0.474317030043908	-0.621138169441204	0.421142191395364	0.383161346353791
KEGG_PURINE_METABOLISM	-0.215251379430841	-0.183393356171381	0.132539866409779	-0.207303532014589	-0.156663145049983	-0.182707690703028	0.330294574312065	0.148500847057654	0.227140605637751	-0.172207738160399	-0.219303679899363	-0.26201280685828	0.212283474391092	0.227952264957141	-0.18276413796983	-0.161556876055157	-0.168928915569164	-0.230632744423319	-0.153610671286515	0.258330087125945	0.240583062223186	-0.166081829200298	-0.172383242907545	0.1585798655868	0.280271289822963	-0.224197689099019	0.140410712286395	-0.154022677869533	0.274620290093941	-0.258277131617955	0.241019197826726	-0.161698632311009	-0.16479050734484	0.2035765890535	0.300477918595278	0.145926928603065	0.247356194410239	0.273621958779602	0.214248752967743	-0.36909219939066	-0.269513455562435	-0.272654339631516	-0.267090629750683	-0.340747496457891	-0.213708286209269	0.178265851995087	-0.229462877474226	0.213911038623173	0.249727537493495
KEGG_PYRIMIDINE_METABOLISM	0.132641945994404	0.119169540480387	0.110117549188858	-0.134129226438574	0.151519348121074	0.120696377226287	0.403979334001047	0.122500457029659	0.374773928244399	-0.248990895529165	0.202949045636	-0.427934427762766	0.234280979211024	0.332516478978134	-0.407817930735904	-0.280359075756705	-0.38822224727595	-0.37690205603557	-0.238722273568582	0.458232866952031	0.263780568319231	-0.170621395126801	-0.249256757218398	0.160819854186988	0.39260704667261	-0.124989829173369	-0.123999448583695	0.305144365389013	0.28997431865764	-0.448553955547163	0.281222003341298	-0.18810938808629	-0.23577801125497	0.291304856729156	0.286437405882846	0.136515927107467	0.427311420002439	0.380450074098402	0.18727553314432	-0.470761294228134	-0.456382785779381	-0.279370318931578	-0.297366460207224	-0.426814954887649	-0.24304115759051	0.326363976643075	-0.419794613325912	0.300995672261292	0.354887425402609
KEGG_ALANINE_ASPARTATE_AND_GLUTAMATE_METABOLISM	-0.163023066939369	-0.214901770453292	-0.29167799538806	-0.231554796012192	-0.22851952967583	-0.213912099814009	0.212231204856376	-0.209822835774083	0.138461527045529	-0.257248776495075	0.22674363276897	0.169423463421069	0.74034097370953	-0.28879170987462	0.238804653825231	0.28144658250886	0.16682023021034	0.203369597339742	0.318212507127241	0.256892194254365	-0.283145131699142	0.664740942703123	-0.162976783719435	0.24578675234869	-0.300330518739631	-0.20667376646745	-0.163266217642405	0.182666446981512	-0.214244837870457	0.149262401549938	0.209787611149704	0.164039910612656	-0.215023882246972	0.448940637776126	0.178010194764338	-0.335301735418989	-0.158994221855358	0.291851588314784	-0.244977900810371	-0.243788343240431	-0.239378018283104	0.473247902397904	0.281683629742148	0.196192791305498	-0.238966838115068	-0.345334246265963	-0.164615838065402	0.148323656427145	-0.178295874495187
KEGG_GLYCINE_SERINE_AND_THREONINE_METABOLISM	-0.330433407178174	-0.362216544929889	-0.492320980073009	-0.358589609250527	-0.377973881117508	-0.355242527434217	0.314903747274684	-0.222196092314358	-0.273501102672992	-0.200622910379305	0.413701362381214	-0.239331978663975	0.813056067713426	-0.183457235696163	0.313438793184117	0.401233849840659	0.241689676514629	0.25907618487892	0.487123165545714	0.306653939010445	-0.325674474138267	0.663778650488979	0.222025989091737	-0.243407544333183	-0.191110762343476	-0.132195807876883	-0.254385151660262	0.277332519765483	-0.296144325532201	-0.194966263733416	0.277515077396939	0.305088432016258	-0.261430022860062	0.237648703028922	0.234029234414279	-0.273480810883676	0.317934827167857	0.319589841584215	-0.246181609135558	0.134455853228745	-0.185770758829937	0.566603686147286	0.2487811708667	0.302874508686835	0.333246715793541	-0.256369692974722	-0.343066618272763	0.201617758702777	0.407157782353716
KEGG_CYSTEINE_AND_METHIONINE_METABOLISM	-0.2185207751586	-0.237815030252165	-0.337994059132641	-0.332413397377413	-0.330997333271351	-0.210508188348006	0.328890405531025	-0.179103927943472	0.339383496122497	-0.179291455850789	0.457648961226373	0.135595408847872	0.558447782010143	-0.138903917904368	-0.147540381739228	0.219769858724534	0.11001973762269	-0.202560026289374	0.252544640548731	0.210405446150848	-0.135844023879079	0.563626956072627	0.146712488820914	0.310240164640294	-0.15904554002593	0.106655947136865	-0.1878129032807	0.445494482754022	0.234012917042137	-0.141718113223034	0.231931199903031	0.28876487163216	-0.139322864113226	0.184547066175022	0.237370349027687	-0.318962868211272	0.318996331207137	0.351632277058035	0.231287529990042	-0.201972092727465	-0.279023146210477	0.445102258056004	0.357100225866246	0.279385121216282	0.319900209153793	-0.130024644279399	-0.203832942714702	0.185730827730953	0.247366868385711
KEGG_VALINE_LEUCINE_AND_ISOLEUCINE_DEGRADATION	-0.304103237056774	-0.256250504380437	-0.312967157581882	-0.211880763231365	-0.290535770412439	-0.262422471894356	0.435282222105401	-0.121597247234396	-0.310665359218281	-0.37901013130629	0.177330904946339	-0.188103711235372	0.762969930896316	-0.168493779649404	-0.119217081850529	0.320830607833591	-0.220599917797856	0.139933707640124	0.397717935046478	0.274757529989311	0.355813514955669	0.695220406090164	-0.239332532558588	0.142984239959341	-0.182166480305023	-0.126818285989307	0.28891625071239	0.425425964848951	0.115925596454592	-0.289288882389114	0.412096496605025	-0.191741254092527	-0.326637081448509	0.178825622775837	0.504688159040595	-0.204144174283742	0.41506325725368	0.571129953575068	0.340615050398502	-0.224287713349371	-0.315796072439717	0.501642194006731	0.276279926831385	-0.179166539020418	0.398100224272794	0.31822887242659	-0.218813725382091	-0.286361305112651	-0.187682078855599
KEGG_VALINE_LEUCINE_AND_ISOLEUCINE_BIOSYNTHESIS	-0.283031111358332	-0.305842548157791	0.402102705263192	0.234071521030643	-0.32059573265485	-0.340266552979586	0.67036501781382	-0.449547575858472	0.226872107031877	-0.342136159374838	0.209561854035876	-0.249676860568818	0.469078689733526	-0.361129378624803	-0.286717758568909	0.326637903304061	-0.312351186072947	-0.424844669603731	0.384227697780064	0.495868263504256	0.497764432835366	0.331410648982232	-0.419861168395431	0.299652130503358	-0.332490570350442	-0.406152886340477	0.24736587698086	0.388267596054896	-0.171389065260859	-0.322807031642492	0.477985158232447	-0.284904888763369	-0.303066375410333	-0.480979495981904	0.424645828669826	-0.262860189078601	0.417701469741018	0.403791460958203	0.241972785337548	-0.500367974098258	-0.469484517440948	-0.345341869100219	0.271786524538613	-0.539170242396898	0.373202183100632	-0.342654238792751	-0.431182826551447	0.327009440931559	0.395307661620437
KEGG_LYSINE_DEGRADATION	-0.168664781782303	0.181937554788438	-0.155764128884131	-0.273140745096284	-0.234306129100825	-0.173319545310519	0.365602432991531	0.196506076325997	-0.265508935636034	-0.175565333059651	0.35073897429201	-0.280963063006669	0.503835004138387	-0.176760787732545	-0.276380808873881	0.24747066497122	-0.235417853075511	0.158639848081792	0.330569782375071	0.311300542831558	0.220695138923384	0.538788842699702	-0.387333077413424	0.153909224464267	-0.150133880969539	-0.245007487317916	0.205334905593232	0.249443721673622	-0.130586144451564	-0.277385297874014	0.205578288473999	-0.203786760325713	-0.323067999949904	-0.165120711562904	0.299946054082998	-0.205978104560298	0.35548960009593	0.369373018279969	0.250835355958995	-0.24770592509829	-0.289642859515375	0.285531779296432	0.234130519330772	-0.215145891758919	0.220531400439923	0.13471407951826	-0.290036685402575	-0.206181292693036	0.287804228539314
KEGG_ARGININE_AND_PROLINE_METABOLISM	-0.266427502818988	-0.286812389931698	-0.345136499275062	-0.263216799902254	-0.325456689450645	-0.279911371252024	0.251414818213767	0.172405041690306	-0.277899704438194	-0.348810738873107	0.220222551539905	0.148644308568928	0.581497748742034	-0.308186553410323	0.382224123646165	0.474867826566813	0.350753711294681	0.437551073088728	0.50028554050511	0.250264739607265	0.27012533589195	0.604865923403514	0.163086263289805	0.155817468912045	-0.325185114942397	-0.235058339045069	0.254870826017958	0.207316557260302	-0.241844006842964	-0.155576652069414	0.238102198610144	-0.18320448449558	-0.213368382295375	0.161846835318703	0.246813860535623	-0.235918753755503	0.179957021616643	0.190123131609396	0.184121507781562	-0.146190325350222	0.14157303133395	0.455097851037693	0.299131611458856	0.358745066540113	0.247793860814711	-0.137584071690408	-0.191915090009441	0.246900714419332	0.259660427886749
KEGG_HISTIDINE_METABOLISM	-0.376867162011591	-0.407219747963713	-0.503773597029838	-0.350098401276298	-0.465012926885597	-0.404596042237492	0.286053445696434	0.197538242602258	-0.278234155040568	-0.234339909797886	0.339919403266584	0.326119232499568	0.664748459111966	0.1867064499746	0.325204405230377	0.416228073646804	0.237222710264946	0.374053894549039	0.384538255842131	0.233351824965827	-0.206474450055557	0.613982077914116	0.185185465334984	0.258534695473277	-0.172123061565453	0.236727291528091	0.348932786029021	0.314644653475387	-0.182967680632527	0.247613829028953	0.279059531912047	0.281714101840304	-0.227971051295076	0.31379005597834	0.18416708989334	-0.287546848408322	0.305060483844981	0.347664133284714	0.250341355210178	0.170534971232208	0.205143565676092	0.494343362538616	0.243896031804512	0.323103187776612	0.327509560321865	-0.147267257052499	0.214196149578849	-0.312782965491763	0.170059420327334
KEGG_TYROSINE_METABOLISM	-0.326619691862372	-0.363861732215151	-0.439986971071536	-0.344638399545718	-0.385319914864575	-0.329046100363739	-0.204239975103026	0.233055459494731	-0.328545887855225	-0.164519186790847	0.241276563110982	0.218014885864556	0.647627470748531	-0.280797820822731	0.438262428728002	0.446355610395356	0.356765222422861	0.462868589082243	0.42972020501586	-0.271723456237516	-0.235038334867366	0.578290013782255	0.31340704888406	-0.218630795025925	-0.274633337749643	0.102881566958547	-0.225849848457974	-0.161938718732741	-0.348204390604377	0.304201011480588	0.22939129386161	0.35081485837211	-0.162394088332081	0.21991640235313	-0.19114271096999	-0.400862095700217	-0.27035871017929	0.305370695092283	-0.228353836278138	0.341031537904947	0.306780155765971	0.520588999026042	0.342035236370518	0.401880870644136	0.315697235969631	-0.200403946905985	0.250237601664165	0.166186422930864	0.202945933814726
KEGG_PHENYLALANINE_METABOLISM	-0.384890039286228	-0.337643210828176	-0.494458536989681	-0.393077573210328	-0.407036343439536	-0.400021583025695	-0.181049808309238	-0.258336923268584	-0.287167931576417	0.142648160254309	0.353116717474397	-0.321733315607636	0.766807229713919	0.259425299351178	0.425684201785256	0.500715580990522	0.423319850167065	0.546676012873016	0.484699048022927	-0.238974374657057	-0.226241202338459	0.570426062945312	0.523427980411137	-0.269623979533625	0.219026800657799	0.212790255043765	0.302953001781534	0.257372746020356	-0.432061086206405	0.254608014902261	0.329761237208516	0.194685042166037	-0.271221926151507	0.218989385552831	-0.200719215134113	-0.361380569798829	0.173766220524868	0.284244348167663	0.206382438776797	0.313231071447029	0.371399536862651	0.639450950246201	0.360063742180608	0.390001424276741	0.346386392169108	-0.203741576054766	-0.217154220553336	0.282350160844744	0.276320703376285
KEGG_TRYPTOPHAN_METABOLISM	-0.296823843158621	-0.23649131573712	-0.367088005375471	-0.307145716849422	-0.258078409303832	-0.363125226032736	-0.228680194729114	-0.297266519816819	-0.402946920365417	0.121894251627932	0.207133592231775	0.187920746597494	0.706489660656549	-0.269484740437742	0.321116228905205	0.23201605947581	0.263174137661547	0.312091233941739	0.34364640199176	-0.230762547146228	-0.185317806803032	0.611629887092903	0.183760963840521	-0.224848541549516	-0.258750244519508	-0.110171537547113	-0.189392873881063	0.194751865632312	0.148662848301248	0.252839138089959	-0.226296903032658	0.170148576461351	-0.32272333306621	0.270333590483434	0.194402431320642	-0.273206400694456	-0.306217028743604	0.179799646227933	-0.17427965026292	0.13356602651589	0.238322673047795	0.433561728120069	0.259960709863012	0.296809715745764	0.274171369540854	-0.23172494311519	0.195762718578885	-0.183065275111971	-0.213972807421296
KEGG_BETA_ALANINE_METABOLISM	-0.368262632162075	-0.334585667801532	-0.406873189087674	-0.30660941023271	-0.319640698811027	-0.28692328932516	0.261545496293501	-0.238214507993792	-0.303785480712349	-0.141771510369259	0.189763126544523	0.183405275117957	0.804333805747449	-0.151451076312516	0.200465619045101	0.481900819076868	0.327419586066904	0.367643467045241	0.468065026768244	0.143638782214216	-0.211374907732061	0.667337152912069	0.212362113775626	-0.204252450911726	-0.300001192384625	0.209764046911498	0.266991771965888	0.16152491415082	-0.265355812493855	0.208898937412876	0.276873212624892	-0.241160573096221	-0.357927472732407	0.23774908182421	0.303314489838421	-0.252745187980529	-0.163234113150221	0.307915426117933	0.230395307207635	-0.169892572677866	0.14294968917305	0.636327143632558	0.260688033698602	0.361108132209323	0.265962597373033	0.139718417635516	0.231652007510698	-0.142231388153133	-0.330993424228717
KEGG_TAURINE_AND_HYPOTAURINE_METABOLISM	0.263334440063483	-0.232420520494728	-0.278880200591134	0.29534314215334	0.297237553898377	-0.284813791552292	-0.294895075775989	0.293927425388092	-0.426545591696064	-0.253538781879749	-0.247998752504949	0.240500356742932	0.497222779379077	-0.424562991758974	0.308765291779198	-0.224871583486575	0.26431772681248	0.215370148227523	-0.232544866510228	-0.478871303368451	0.256125330580525	0.424906441928907	0.279185692917564	-0.414178006340311	-0.392473149274549	0.256458452814156	0.394922013036624	-0.309190376841763	0.343246091090951	0.188329247033328	-0.511523022588166	0.311217556903372	-0.343848857166641	0.375199715493162	-0.270906342664276	0.386816346892081	-0.344534884154689	0.252042712649104	0.256599816184399	0.509456021655844	0.422201591471092	0.614544979498024	0.460347710116632	0.422351847635551	-0.377714221925054	-0.332282590851921	0.317588306170336	0.354467608488808	0.228558258549124
KEGG_SELENOAMINO_ACID_METABOLISM	-0.201588491842823	-0.220448176991842	-0.223555135224974	-0.324193993524943	-0.241939501601097	-0.289315175673671	0.497036031855637	0.34782474155811	0.234858569242832	-0.566391704667818	0.189660338175118	-0.320081686462761	0.474614575213057	-0.359989943330839	-0.497461943413788	-0.190086126575485	-0.322445079122513	-0.383942637266436	-0.21767752306902	0.320161879964105	0.280554429304014	0.420720426906834	-0.456991199444416	0.238147752455259	-0.293396522877139	-0.192768973280916	0.243967130602481	0.295224346928036	0.351587994629066	-0.451685530147629	0.375001791243486	-0.332475770863487	-0.381169383658963	0.269714948168538	0.505985600058221	0.223538910909667	0.457540475735978	0.556444998270379	0.4498847283464	-0.3116162192468	-0.37356620513334	0.288566813892023	-0.300445082992392	-0.261836919439353	-0.251489770890396	0.262534180030587	-0.376318066008749	0.194662076357574	0.376919157306897
KEGG_GLUTATHIONE_METABOLISM	-0.303681849434849	-0.244644704951276	-0.314386776747395	-0.324745024252701	-0.260679505699881	-0.283453808723595	-0.169520347295263	0.192254567519477	-0.166338188070456	0.172945262490084	-0.234094457993464	0.230408307438177	0.546861943133291	0.261489598914151	0.145785642476959	-0.204772315995439	0.131379945127015	0.248608756990145	-0.159939148102568	-0.258832421759992	0.369467368174421	0.478224207911557	0.33773930319988	-0.268937268633024	0.29366173580132	0.219470305774049	0.298512350337129	-0.173330667998165	0.139860759929826	0.152534516938783	0.262679561518497	-0.186038623519905	-0.285413018964115	0.135227818223456	0.37310897398849	0.217223070810955	-0.227424383681264	0.291757842671897	-0.247714094487451	-0.206352036492795	0.179022147470212	0.321653693218085	0.195963486661349	-0.177220258974225	-0.171328111993214	0.212594877963025	0.187118961977649	0.26256380109435	0.182411262006615
KEGG_STARCH_AND_SUCROSE_METABOLISM	0.199467612737402	0.210790034545686	0.229117007121326	0.186463187297955	-0.237839357257713	-0.232612932051582	-0.298193444312043	-0.3642405081778	-0.394665808611089	0.329631947813879	-0.303481352182987	0.29423366412006	0.522006887097844	0.273520395418202	0.297890363224998	0.203953988785326	0.183950496678087	0.257304138019337	-0.198662568325998	-0.333708856136566	-0.327643915167521	0.481738019129092	0.369581451484345	-0.329422210344593	-0.16656422509601	0.241048719997554	-0.366315515283088	-0.286337827816016	-0.330251742922158	-0.153618815490787	-0.21892487684857	-0.185027734999882	-0.287857977980005	-0.198212656381564	-0.209098037168265	-0.24869831042019	0.164800170138508	-0.299968537656917	-0.323257473382154	0.198906580542625	0.157345139594934	0.361253850267267	0.27023905795149	0.280172554175402	-0.2326240571286	0.20775051535621	-0.262165878666749	0.17609634784897	-0.315385321078912
KEGG_N_GLYCAN_BIOSYNTHESIS	-0.328301785301762	-0.196125532992165	-0.288869270659387	-0.329124708293551	-0.293486531148499	-0.274885116843838	0.311313871967622	0.284309705723088	0.490759877592543	-0.318522704196527	0.214017151375298	-0.418062907521413	0.436379512102578	0.145801268862156	-0.456267232941611	-0.153862845073859	-0.348640678906062	-0.234457957847072	0.174801370748134	0.209704535502916	0.296528945245313	0.308093978981547	-0.474753253265043	0.365328214885297	0.288075986271824	-0.123434818534288	-0.12153176870375	0.325056965698838	0.370359055355384	-0.119900427750169	0.261654351951621	-0.324670648899923	-0.154361958993286	0.351051819749672	0.543673119228246	0.309900782388753	0.328065586397399	0.300485755343501	0.470488723280211	-0.336787693846075	-0.419774433789121	-0.242000142744666	-0.283416649572823	-0.375318790997047	-0.152843823517578	0.550941451992105	-0.328656269928492	0.232188381787674	0.306403716268336
KEGG_OTHER_GLYCAN_DEGRADATION	0.204434884759168	0.274375342149511	0.252569913865537	0.250293429358045	-0.204563055333288	-0.233692851348287	-0.206023835259358	0.301730880729748	0.239918383458532	-0.23206378764811	-0.413713468627585	-0.346513604928235	0.539390441240905	0.408799028829929	-0.49783763228315	-0.380442959069361	-0.436404627825904	-0.309565261009399	-0.386595903109003	0.282775312083149	0.498198048397526	0.252811452962637	-0.398869244085665	0.461331180050664	0.382145525623841	0.486375114186532	0.209144351218353	0.262189755001079	0.372349456294017	-0.219328376114801	0.300770315665473	-0.627750713159319	-0.545337877159594	-0.308746915677299	0.437636576586395	0.393068098728032	0.423598570010847	0.261209003282365	0.375241558559868	-0.21642294618002	-0.281629393988261	-0.326057090399613	0.287435046819682	-0.428835923149489	-0.400244697990761	0.612085154796389	-0.440940714671213	0.269262692739323	-0.172928898729608
KEGG_O_GLYCAN_BIOSYNTHESIS	-0.243230228533877	-0.248598488130764	0.234933047605202	-0.258891646977634	0.22528704820694	-0.208826027447248	-0.351492513580388	-0.276997293085361	0.271925180168639	0.416210128816647	-0.268257930277181	0.30979173655469	-0.253855539423755	0.399521813269219	0.306467478574275	0.176695281555264	0.263533575570272	0.31846289104362	-0.259913901926605	-0.237738858220687	-0.362375893801132	0.239964615819833	0.336479981147979	-0.225077237055173	0.291229746299838	0.277265693822303	-0.296720364157108	-0.412902245993006	-0.238537913898189	0.302951131933811	-0.302645686284213	0.189889969874407	-0.272385151924113	-0.220950015716299	0.218144774517368	-0.365530387098585	0.268991362590291	-0.352526324643099	-0.37577032893281	0.270731341622268	0.291707303573292	0.308280539789908	0.417434115635791	0.505700520367766	-0.216247599837949	0.393606779915985	0.350515201595459	-0.28943602330792	-0.284963433710242
KEGG_AMINO_SUGAR_AND_NUCLEOTIDE_SUGAR_METABOLISM	-0.271602169054553	-0.241887419715349	-0.157626549761142	-0.324443647235623	-0.276755867777939	-0.360523419983902	0.236399935735902	0.150368767103764	0.31435512787242	-0.322434233768376	-0.20245156376271	-0.461973921666321	0.36628408290674	0.193384498985795	-0.215640604259033	0.286754512268275	-0.237794482905408	-0.14835845367058	0.272339813551924	-0.197635687871921	0.394758502591042	-0.178410321440595	-0.264386185701184	0.448258149079204	0.277562460438598	-0.242245875985777	0.254586573081737	-0.155240420982655	-0.168659208416353	-0.280758939692673	0.191043463710494	-0.315092682822421	-0.473272562984386	-0.148142713869617	0.364286084560635	0.303658560748776	0.240399017983757	0.288780204877945	0.368132517184347	-0.239785063560827	-0.350631050097618	0.248338061143523	0.258536374557566	-0.202782080155697	-0.400923274230534	0.388260077616387	-0.392360502822206	0.304253912699473	-0.197879626092546
KEGG_GLYCOSAMINOGLYCAN_DEGRADATION	0.136427186558416	0.248318958097703	0.140887840263762	0.302186141105931	0.134078194548372	-0.141808025877652	-0.333430633639899	-0.284769627616313	-0.311954031716181	0.284755545501813	-0.44111750308667	-0.219341412350884	0.332213381400209	-0.264661795405616	0.223389243488289	-0.289955439197796	0.202867350329917	0.219842620872061	-0.398710652581995	0.266770859775681	0.269676456078339	0.27939048851553	0.290705344008794	0.394484779906134	-0.291447805203627	0.195669210472158	0.223307393308439	-0.304262625208574	0.223602703941493	0.355922531592694	-0.393242627395136	-0.501922608405393	-0.347850960105118	-0.409740326277475	-0.25609790820107	0.268928793591634	-0.441816385859239	-0.502023141899862	0.246951426706881	0.185043035069138	0.245857324600297	0.243854275504525	-0.323733820207054	-0.297005157885444	0.200785753954638	0.391727258856982	0.215923077065226	0.427397267383543	-0.370426900401492
KEGG_GLYCOSAMINOGLYCAN_BIOSYNTHESIS_CHONDROITIN_SULFATE	-0.458325677906863	-0.375302482593969	-0.224826671718483	-0.389581515989852	-0.304957640760166	-0.418275074956399	0.29523244948902	-0.279272486175828	-0.305130753797103	-0.225314521925848	-0.534119569253091	-0.214570056825762	-0.382070707220849	0.280424837736572	0.139302496335003	0.24158948087404	0.517118783505669	0.31535007614708	-0.281820502352443	0.172483817743369	0.26770080361654	-0.318110713118707	-0.203714158842748	0.58874932988594	-0.146906695008308	0.380282657929443	0.29915481176768	0.40892108875119	0.294971462346573	0.260471755695195	-0.343828491065153	-0.578590929295562	-0.253626561800428	0.299736965685849	0.372285382956709	0.422181249363887	0.2021580737325	-0.319445713441836	0.237812738487	0.230734333647974	0.417057108576595	-0.258124329363151	0.278688919255287	-0.271913481486069	-0.23176596076653	0.38067910805749	0.154414174532826	0.25671623130251	0.368081434411979
KEGG_GLYCOSAMINOGLYCAN_BIOSYNTHESIS_KERATAN_SULFATE	-0.317684657279619	0.201520449469017	0.32907887051044	0.306353988597301	-0.319589064049989	0.37107817088294	-0.40400285016099	-0.430063651165236	0.374068352500556	0.32457192992174	-0.278933786306934	0.174551437329263	0.254607810681368	0.399416713526273	0.310853254836634	0.207001532842027	0.487704618452238	0.284740444956185	-0.365338887004271	-0.449323751763279	0.309088076136724	0.255972662659587	0.221558370034502	0.412850579110306	0.389548398668464	-0.246117116152763	-0.378973549909438	-0.430973070167431	-0.287350990652248	0.387931922059374	-0.405811434531122	-0.535266706282626	0.177233175783446	0.411442277811443	0.389836356026341	-0.502719143472295	0.271741198858197	-0.372971005349055	-0.376973086005654	0.236483476139863	0.296372486502846	-0.244200812187769	-0.321472042356	0.257452463600873	-0.234126201918497	0.205142134692332	0.240545077461669	0.506795847021487	0.1810550122184
KEGG_GLYCOSAMINOGLYCAN_BIOSYNTHESIS_HEPARAN_SULFATE	-0.137414764598422	-0.180431391226369	0.28029097900146	0.308578561478845	0.310886841498469	0.178727206407649	-0.32718395403269	-0.242155270615482	-0.262808892810176	-0.348248222241652	-0.417265617505961	-0.241300464964634	0.288010993970308	-0.488372869992128	0.283340689803421	0.30975063210916	0.214054864476019	0.313203900881812	0.295684086541015	-0.29719444773994	-0.273747433142151	0.290760727739524	-0.374278819941587	0.332388863908159	-0.505820887074545	-0.159205054171902	0.195345091368413	-0.321948502628366	-0.309758397596196	0.19793746086113	-0.515560203433412	-0.363264998333134	0.362956197113446	0.334385105794241	-0.232091913913613	-0.261852631161634	0.232863761214473	-0.301265341224372	-0.232574222663659	0.280936599359465	0.244902349590712	0.278760707750744	-0.321436485054357	-0.288723674662392	0.23743933397471	0.397654368534577	0.261337133047742	0.267495325990859	-0.215634664848981
KEGG_GLYCEROLIPID_METABOLISM	0.16545062579051	0.190360376623444	0.186183358071702	0.222954234068263	-0.223591591634417	-0.204237229601005	-0.240756463865509	-0.259383802582553	-0.24756558564872	0.250938268205262	-0.237051262706843	-0.193148269028899	0.440204627606765	0.255153699325351	0.228408589543206	0.235442073828392	0.332026825949946	0.278319220655633	0.157088627359748	0.223285858304537	0.218631229685474	0.451491745275978	0.160236069622522	-0.148108567135997	0.209787975801366	0.246427231048071	-0.293428747279732	-0.22869558714387	-0.197751010243495	-0.198538121169581	-0.285533316847841	0.18977733980264	-0.19867569936687	0.324186034710233	0.224457235740956	-0.1892061526964	-0.342149102209669	-0.270239094526769	0.246607905450515	0.194834159380679	0.26640932596438	0.22894998651542	-0.191844973563562	-0.233104055945731	-0.190078504504383	-0.156701693803044	-0.252283353355921	0.265764617694087	-0.215627706591794
KEGG_INOSITOL_PHOSPHATE_METABOLISM	0.188139074771591	0.241148835783852	0.279711636717225	0.310329714625896	0.339365172188207	0.278025191508481	0.271432786376383	0.291128620307244	0.197254014491958	0.295659295621185	0.164207485692498	-0.176261682041293	-0.338753344951506	0.279366705561088	-0.251959817575814	0.151280559176768	-0.141268538908013	-0.184325650654875	-0.183615380363186	0.253753384626701	0.179355074625251	-0.220150385583913	0.192353877227404	-0.218111476373487	0.180152825061714	0.332335724527945	-0.172132688086557	-0.153628914103025	0.189838247526395	-0.202010669026041	-0.292456378412754	-0.24503861465794	-0.282853279169503	0.27281913098821	0.141517984951081	-0.167161628539148	0.205912426604599	0.174658639631627	0.177138528259267	0.18096935523171	0.249285823464944	-0.249557595300358	-0.177042785817056	-0.23662372014482	-0.211104982688029	-0.243737694967438	-0.207288927724379	-0.217499753067349	0.254944754954919
KEGG_GLYCOSYLPHOSPHATIDYLINOSITOL_GPI_ANCHOR_BIOSYNTHESIS	0.329345451958245	0.395174974516787	0.283271399457026	0.326804168140873	0.220267525836394	0.293809655975514	0.391572973318011	0.505199346996797	0.463014906730028	-0.284677515647691	0.176570798889507	-0.484781699441919	0.139530114280927	0.257530928466182	-0.470401347832511	-0.383947680635693	-0.476218367245707	-0.333827141300971	-0.33570557198429	0.378451945361801	0.408089463837201	-0.289652530281483	-0.44122142281708	0.270209812065982	0.306125234835476	0.290174963569269	0.349073453659544	0.508543980578216	0.357116812086448	-0.48349365129125	0.441193566290712	-0.279536428802212	-0.183949215401155	0.205043554770628	0.175385019404456	0.363147218036641	0.515435245519276	0.536130224082105	0.496825167866441	-0.354459085027917	-0.625125844580616	-0.504376969415684	-0.336086838196182	-0.4897616733034	-0.203980933315119	0.343027307398122	-0.488611637240453	-0.22734077564721	0.339033139991255
KEGG_GLYCEROPHOSPHOLIPID_METABOLISM	-0.170187213777158	0.199249132098315	0.230695830244261	0.26834078951748	0.195759560072328	0.176046572149147	0.153340676632394	0.232354613309128	-0.151424722271729	0.200591868170369	0.17148256710908	-0.208063836792158	0.225919303117702	0.317772054236048	-0.203824351043475	-0.196572350564466	0.165345030333553	0.169571109759558	-0.231200528186639	-0.201553654824189	0.239990662480928	-0.206469213637576	-0.197569748580508	-0.177629962703466	0.273800112073588	0.284904384408666	0.235086469930368	-0.20179270158907	-0.146666266805144	-0.245194084952466	-0.255951197661203	-0.258107356933698	-0.217141011455152	0.259597004247955	0.182187893758712	0.277827152568697	-0.149301802829408	-0.193966605544032	-0.166094865018447	0.248240560947535	0.147781001131496	-0.185676538644096	0.210754101165533	-0.184439396104925	-0.199547133452061	-0.178800218592724	-0.249765691039774	0.208643997257485	0.21399350808672
KEGG_ETHER_LIPID_METABOLISM	-0.263828764332388	-0.290418570001618	-0.304175439991406	-0.232902311926042	-0.2671207112952	-0.281802998439946	-0.161277498419946	0.345641050034579	-0.266785616826912	0.19799173949606	-0.220299906900475	0.376221848381756	0.345745847514789	0.323472464278658	0.299856521823853	0.135086372164594	0.20939472371794	0.261372794241426	0.171260618052523	-0.252425889795179	0.273627539510514	0.248338210821226	0.285310424249487	0.168244587348232	0.189084110718044	0.228150415310862	0.297106935592041	-0.207296818812821	0.180629904668206	0.340441663352887	-0.256896320074981	-0.273972182442481	-0.23981204201786	0.245289556425273	0.356990899503154	0.389796618805708	-0.190274057923803	-0.223631177783524	0.144523440810417	0.392256977900339	0.248428143139154	-0.167997317054502	0.337680945397277	0.183777200316179	0.208896553543835	0.202977627198577	0.337368512475313	-0.237535614903161	-0.309335448134815
KEGG_ARACHIDONIC_ACID_METABOLISM	-0.301783234716021	-0.346183019792517	-0.414963792825162	-0.347544789724148	-0.405578611942168	-0.384468823720062	-0.320122542160216	0.182102407362904	-0.328291549945271	0.392072449685817	0.306659018535603	0.439719331157044	0.447036864058549	0.200413093060714	0.465335990464082	0.341555339125357	0.410829903645942	0.489821308559824	0.288907986602944	-0.235098600020142	0.195404407849355	0.442184488926611	0.457513430268557	-0.259364146990389	0.2065979812698	0.269759306184743	0.226874065114787	-0.283938793231552	-0.296772326890924	0.40255010329588	-0.23090751011705	0.215076077177486	-0.161047772427441	-0.243391509315523	-0.201603285102945	-0.216281456053904	-0.380596375847683	0.147806283835405	-0.227852692837366	0.390733463257843	0.429611229166052	0.434036091083536	0.335331931913686	0.309378788178759	0.259894847109524	-0.188097717878737	0.425836035059027	0.208438680305932	0.255979709112466
KEGG_LINOLEIC_ACID_METABOLISM	-0.1863251485076	-0.327487992167001	-0.442975383104417	-0.343164605802421	-0.4487651735875	-0.443039088445979	-0.367568894307885	-0.230293119711226	-0.49999212593533	0.343146644812045	0.423467546065903	0.498966582901782	0.668731230569943	-0.21229697128319	0.569871198724499	0.460759967841123	0.460063792232351	0.532170794957448	0.483483891730239	-0.38370373819046	-0.294700760786761	0.647868735662633	0.430386220739919	-0.445640073360057	-0.298723762746873	-0.214513056044495	-0.381197532049812	-0.270286911659513	-0.488431197439073	0.423975838092768	-0.338350946613126	0.377970894771465	0.348569230932478	0.39344620277909	-0.222989770533949	-0.370156450803677	-0.475111252851696	-0.275786057368249	-0.397476275525598	0.500592113681544	0.405908672556871	0.495753297368327	0.396803613671456	0.422868646229099	0.475590459933967	0.193219109664198	0.418194663545975	0.219784163373809	0.186428843468368
KEGG_ALPHA_LINOLENIC_ACID_METABOLISM	-0.322414509117941	-0.357203927076978	-0.391139370185424	-0.243381523133069	-0.349295882303736	-0.348497692296083	-0.225703875501863	0.329435491576548	-0.523565432631365	0.222295277904228	0.470100193755664	0.566577597626842	0.3979599849376	-0.174461968367687	0.540361853645262	0.403444929001452	0.446345405985983	0.547304044216769	0.387081606427237	-0.416864510933219	0.195936242406379	0.319616358105843	0.314502632108481	-0.320805792681383	-0.268430172477078	-0.212649876292576	0.41479614394406	-0.199921187489293	-0.420537641151579	0.349239361577646	-0.273982317018834	0.225858763183077	0.218195210711436	-0.282110221535927	0.432677146770337	0.322912992255076	-0.481558624182782	0.289088914529186	0.178175514855442	0.52751478504818	0.357260480289803	0.412236364178938	0.468979966058143	0.323246276023782	0.47084925413538	0.260395300479559	0.520688409176341	0.318754389760793	0.210341643226923
KEGG_SPHINGOLIPID_METABOLISM	0.217241139589962	0.351177033510569	0.272031186748675	0.224432372952092	0.187749161804884	0.164006977982505	-0.193908103096479	0.242809019905338	0.291057648088045	-0.219656502722486	0.233310436767908	0.227748952412861	0.248146510291378	0.171781802063934	-0.32301683967382	-0.395632094865752	-0.358515502607838	-0.290264224157999	-0.402262180584621	-0.199309960655114	0.387754089767478	0.250041831658812	-0.137746837784846	-0.243713701967489	-0.248444174145683	0.276672554288072	0.340742231086902	0.216528116021692	0.127385675363462	-0.202966838670658	0.238554955102538	-0.399860697332989	-0.2543844690492	0.23989073722036	0.396071955665267	-0.194277920602783	0.262548525582103	0.356075088386686	0.373344765094618	-0.319266495636797	-0.24309078870634	-0.137056358104669	-0.168721488680708	-0.309533688089859	-0.248226058067622	0.3652379402758	-0.209588141519885	0.263681952506244	0.288177088866479
KEGG_GLYCOSPHINGOLIPID_BIOSYNTHESIS_LACTO_AND_NEOLACTO_SERIES	0.289656449744026	-0.202744870439681	-0.230230220149441	-0.206910840771237	0.168877751882802	0.25282236192045	-0.274870444084367	-0.48744618834862	0.343208076083827	0.229426596679951	-0.41759970600001	0.264056988809887	-0.184606669853326	0.34802442364745	0.278283885458729	-0.288493892988311	0.167516474568504	-0.201303374433217	-0.279131002440299	-0.263974461435134	-0.228609880192124	-0.326758784349159	-0.187420866367926	-0.318261058803698	0.364150980227906	-0.36971251541492	0.231422273099343	-0.33957903909499	-0.384656608567659	-0.215736899335894	0.262615800375282	-0.312328231122982	0.227907550867111	0.336786925102383	0.241553794196529	-0.34547966444287	-0.180069819105048	-0.305743779131254	-0.204375540369027	0.328791880548886	0.259948023583092	0.312135877658684	-0.316625057028382	0.228922940682813	-0.382604616851959	0.283578916251675	0.210882973867892	0.38221992406068	-0.331579119301314
KEGG_GLYCOSPHINGOLIPID_BIOSYNTHESIS_GLOBO_SERIES	-0.252559238628431	0.259328087204074	0.342743834669644	-0.210723070987672	0.242911456276827	0.269880515325987	-0.613918855021764	-0.426034613263757	0.443973753186028	0.42678265433626	-0.426152350293857	0.420279983821872	0.209833042617556	0.366488335813219	0.183484312902441	-0.444264558736403	0.293520586690784	0.181867327550012	-0.49958215661206	-0.439797670488148	0.317667481820963	-0.203219687928409	0.484779766076735	0.413791571686113	0.460574862261642	-0.306810945029688	0.358043210092543	-0.372963882651908	-0.336789754412843	0.387798451780425	-0.332986931096881	-0.296013736199548	0.278274659054818	0.381101206917033	-0.227691346427617	-0.241352381283711	0.318161625722286	-0.425681845770416	-0.292887340272158	0.254306121347867	0.401551420616511	0.161306692039338	0.17823135986828	0.180159902432454	-0.309527220261735	-0.217179727334769	0.327122801206521	0.342984367253949	-0.401421219009286
KEGG_GLYCOSPHINGOLIPID_BIOSYNTHESIS_GANGLIO_SERIES	-0.1880430364831	0.228580209447273	0.277864628806317	-0.224768807451543	-0.230030793441248	-0.22597859663853	-0.390633598927175	-0.282604984965192	-0.20409724109294	0.382998477701055	-0.293189849493251	-0.339255162326489	0.443704568388449	0.409526661785261	-0.146876737529714	-0.493741954465003	-0.295408551529095	-0.321952686857027	-0.473177668860868	-0.325093599642075	0.360125057685189	0.32298609848369	0.392515428581802	0.449064003267556	0.354014812252149	0.358072790901601	0.234034161262798	-0.297616663256925	0.42412675963338	0.396586677796158	0.224115800404027	-0.41919513286723	-0.285152384433775	0.480031718382528	-0.214613632416234	-0.176910691318501	-0.31704335206037	-0.486966545386322	-0.358581783640646	-0.226096273000442	0.277545239941196	-0.230344997325014	0.28291933314793	-0.241480904808151	0.261850366763844	0.29010958789397	-0.309790395219985	0.32491411698282	-0.413594613369423
KEGG_PYRUVATE_METABOLISM	-0.368367075639642	-0.315881052299212	-0.328369217129449	-0.269548926180246	-0.338459842259891	-0.283417000408601	0.277125758740196	-0.160422505521207	-0.261278009771912	-0.298558086079229	0.248704603612685	-0.243321101132456	0.650636091083493	0.200345637554072	-0.171493319436838	0.175081832577619	-0.194251220701168	-0.211978870232487	0.242191944810005	0.313429017807834	0.258994347752742	0.543369742072221	0.186130424315124	0.157575255442132	0.142360501956166	0.134510012347233	0.282521711669928	0.368487963153936	0.152648544422771	-0.240310463915285	0.286873154753352	-0.184759632651385	0.160573797977254	-0.148203933344147	0.337627901958474	0.180943554358851	0.296657435058341	0.266762192954772	0.34412889114353	-0.222564763523535	-0.339414562551387	0.467769596321482	0.343008432468494	0.140744686176627	0.329440685925054	0.351921622183107	-0.181495450627083	-0.229315379676539	0.283944642122497
KEGG_GLYOXYLATE_AND_DICARBOXYLATE_METABOLISM	0.222419590179545	0.262450041235814	0.242191304408204	-0.325757313963426	0.243798769269791	-0.245777909234039	0.387247506950302	0.203958637315232	0.45515212519657	-0.431285601350423	-0.197183307659491	-0.485511340739301	0.635037089268537	-0.396853983798878	-0.367863534364783	-0.297777403049409	-0.236000658359435	-0.456536928943059	-0.298637172295188	-0.162489742058018	0.500529620407744	0.474880559289729	-0.474580985854788	0.243719591246305	0.272790712427829	-0.3555666758866	-0.260812446152036	0.349030986116293	0.214870265812345	-0.495686998383367	0.272977379265044	-0.182833217027212	-0.285059260179673	0.60605668467225	0.443880623661953	0.194188923428281	0.410188239717204	0.262758363259237	0.42106164371028	-0.479282708091718	-0.388800791532829	0.318895940495634	0.247856093123939	-0.236821131572197	-0.245067563281089	-0.254642326339879	-0.541624727739454	0.45686821574364	0.638943786606837
KEGG_PROPANOATE_METABOLISM	-0.396661579098614	-0.411757788195323	-0.43208698218849	-0.481920558568265	-0.428914218021516	-0.440697402445475	0.346027449493513	0.177308620138448	-0.365527495173554	-0.405376649371518	-0.132476109660023	-0.215961910217968	0.810267510090092	-0.116896310876886	-0.232192931306795	0.252096677004144	-0.171659535318468	-0.186176242757104	0.297451631792557	0.215330489282164	0.190441675498518	0.693414441269237	-0.313577023640017	0.181676714859209	-0.190744902255261	-0.163327314692749	0.37988539273448	0.35751832535702	0.093529747920496	-0.237048469086803	0.389808638346814	-0.387643586068606	-0.353845279705107	-0.164772366499462	0.448832920477954	0.18971242118008	0.344354740862419	0.421090163919653	0.289265985113417	-0.163073491137738	-0.325424156863261	0.575324393807263	0.387119262493281	0.220561598665114	0.27536370074194	0.449528003354414	-0.171521526229242	-0.370818885003257	-0.212211027406904
KEGG_BUTANOATE_METABOLISM	-0.279424741427071	-0.247268910100527	-0.373632121735216	-0.189676563560339	-0.321026416644734	-0.235358106341261	0.280032790759452	-0.220516015280527	-0.277497864383303	-0.239516184085035	0.248541369249484	-0.123266031490339	0.710131168178014	-0.258479621206103	0.243724313524764	0.329618105416701	0.203346673856994	0.197196903505518	0.417420642802115	0.344669794914893	-0.192856878289785	0.639530001335773	0.100052860715891	-0.275220674187654	-0.208009327824081	-0.275090166821928	0.2255282954626	0.284095987407074	-0.243740058098377	-0.237747235212463	0.294791856745127	0.243073936935892	0.192012098722026	0.306689762580797	0.398544078418698	-0.30439681158627	0.340641980311441	0.358330745423072	-0.172952689458777	-0.180681793203007	-0.247958209438855	0.426419364277123	0.19916016581596	-0.149760952410699	0.383567764326794	0.164366491457916	-0.122047591578961	0.203136906273793	-0.176350535657358
KEGG_ONE_CARBON_POOL_BY_FOLATE	0.298900545339297	0.243171154968375	0.205928916710546	-0.210084923098398	0.251617478229176	0.161591168633414	-0.161768870675415	0.261173630206903	0.335529100153536	-0.300630344246746	-0.297194233647948	-0.403650154863759	0.637477421933773	-0.106088775532438	-0.344704204981132	-0.146999111787846	-0.201742313108687	-0.324743988048388	0.34616693630608	0.316097243527168	0.228087021403633	0.512579840558327	-0.414448159501378	0.266581098802782	0.37052902225757	-0.262496480392072	-0.306997291974698	0.363863490300932	0.294944531966879	-0.272423700659571	0.29441962875947	0.363231000914511	-0.283805616543245	0.471205552699874	0.323829273577942	0.261200496418775	0.355227231276693	0.414400511881449	0.39937633980828	-0.335160519488447	-0.296558407192077	0.36980080221821	-0.255806020431346	-0.217303461085855	-0.26424904726471	-0.46760500137467	-0.398463359255501	0.385578772279669	0.412273713372774
KEGG_RIBOFLAVIN_METABOLISM	0.242584473138305	0.255403685051193	-0.155770477287047	0.171086018776939	0.208340240492972	-0.172140516192157	0.40546848544716	0.349146464985922	0.48990174803056	-0.375988236475867	0.185041867546298	-0.393757940425906	0.203331623944479	0.239995165330812	-0.335411820394664	-0.196356045460135	-0.361505521524243	-0.241577585038145	0.244808686284076	-0.339334187537288	0.333325210379733	0.260803195139566	-0.190516777113257	-0.198254658753048	-0.204591279490184	-0.266161563794362	0.342631140680589	0.377163184655941	-0.25356289740165	-0.291998563411916	0.301777299376207	0.218392198356614	0.349491814002899	-0.267042480534171	0.26617843488571	0.406622404488396	0.207495659192791	0.337433457073194	0.256721666951525	-0.280718750057854	-0.399113870487229	-0.266755262283356	0.21286734057456	-0.312644467130634	0.285804382975638	0.292769316920525	-0.342257733318331	-0.222663288591207	0.319443293863907
KEGG_NICOTINATE_AND_NICOTINAMIDE_METABOLISM	-0.241553465268664	-0.282646798475064	-0.244493037529776	-0.180887896438322	-0.187298809125787	-0.266583206166799	-0.28049639124365	-0.349862563576811	0.208892058532202	0.412140831678748	0.169450131682555	-0.281096758797885	0.575274699148057	0.350860121107372	0.324004956143491	0.304649446492424	0.284939334661553	0.304371551486661	0.281469653828305	-0.221051843871898	-0.189564539329915	0.504077151782012	0.342927729815777	0.249072077813921	0.404783991001794	0.346538156934823	-0.337331364487912	-0.281955006674003	-0.421114219451589	0.264401254093281	0.183464331328014	0.264725704061215	-0.31760707609464	-0.326945128340265	0.257517743434131	-0.27583682224602	-0.202553307028667	-0.208032409877863	-0.392565894590668	0.270555115310812	0.368318076070589	0.376513672099412	0.283956717701187	0.285813166836138	-0.25496551822974	-0.166650415661055	0.190163924262956	0.171337696822482	-0.33703505009425
KEGG_PANTOTHENATE_AND_COA_BIOSYNTHESIS	-0.240159505327623	-0.234312008899469	-0.250061540365412	-0.34274928464483	-0.291555984300477	-0.274029293906334	-0.317137322512708	-0.389899783376996	0.446209651259377	0.348808630305571	0.217793899135161	-0.343412738796594	0.497973498105183	0.335580875174426	-0.169239935283584	0.227678492056858	0.171077602416746	0.193028228338989	0.226811211423363	0.267495839124601	0.233140899574978	0.640065232327453	0.294273995420269	-0.295135031739131	0.307827239788192	0.359805214153949	-0.388817338981575	0.215377783416874	-0.359270383408829	-0.296890607091881	-0.229322606982652	0.294481106168058	-0.433603216110108	-0.164509576414609	-0.213292959248756	-0.212215495220244	-0.1762345423784	0.211361778006482	-0.231387620855566	0.207401110898703	0.235835688739213	0.506958872918211	0.40168844693401	0.293810918279704	0.245735118578144	0.329981601206413	-0.22751977093719	0.22083327955022	-0.251289114171681
KEGG_FOLATE_BIOSYNTHESIS	0.30560384308038	0.403258401078957	-0.247998408173833	0.293451882816128	0.576866342675925	0.48341129445797	-0.344136346272766	-0.491445690608105	0.326465444990655	-0.299218518035787	-0.342497754441577	-0.48588181701169	0.644499692150253	0.388751804622909	0.266671638783921	-0.506071151428956	-0.310283504989886	-0.370915621014654	-0.390036244480073	0.406971165686294	-0.242883968599605	0.492996237218732	-0.29094525705226	-0.380052839287525	-0.372041946767087	-0.287168751190101	-0.320415606963394	-0.426277600447853	-0.261700599381245	-0.364727579101655	0.460805139436833	-0.179165176924376	-0.400040065362952	0.391066727620492	-0.32525346963656	0.277679137603023	0.553201058383255	-0.411061831032061	-0.326216644519151	-0.745548400638599	-0.463621773549889	-0.368667421346096	-0.619275116604557	-0.519328739365362	-0.458643109460155	-0.379452633933918	-0.413816378481762	0.403756225989522	-0.261387484207208
KEGG_RETINOL_METABOLISM	-0.354717008287452	-0.447415576611754	-0.529618172802691	-0.516523113757168	-0.529241637627583	-0.504827458407689	-0.44509932462282	-0.394698650071885	-0.405048636853607	0.373156417049398	0.37952373513742	0.560184587239131	0.783925277372532	-0.242174006590683	0.565913425638372	0.395625528842399	0.456849553514453	0.481258082845615	0.261240422465758	-0.287244903063617	-0.430031633543403	0.784901365943375	0.539123548274617	-0.377263451742232	-0.291278543499685	0.300945368607113	-0.401473333509847	-0.202357188789652	-0.434036688299202	0.521265870582396	-0.367896697664321	0.398183097100591	0.29441726100903	0.336078719318378	-0.326344473717186	-0.536063477964556	-0.372207478705538	-0.287178274224774	-0.415429013853805	0.325839247384447	0.373803323555211	0.474926617671759	0.284597147377053	0.442127603779229	0.37762510451069	0.201935885261944	0.49622932218017	-0.35346385815883	-0.277566116217654
KEGG_PORPHYRIN_AND_CHLOROPHYLL_METABOLISM	-0.338577595229849	-0.378832909507354	-0.485362485452563	-0.483685784253741	-0.53756533156505	-0.456402294707162	-0.144001716899209	-0.486320548183447	-0.395644604732581	0.435014383477774	0.300455741343794	0.222635905771305	0.617867803252576	0.449160500009265	0.315103678718002	0.28182812195935	0.27342900536236	0.263806973416221	0.222143981404671	0.243607675025863	0.208408389056709	0.591155092273344	0.434635366674282	-0.167651771084321	0.551338086578517	0.416211380284452	-0.396954368304308	0.197052268848308	-0.213183310168907	0.275080386808811	-0.168288540856681	0.249056272569545	-0.177810138786562	0.188436072060086	0.234739255904458	-0.417096344819561	0.354712918589755	0.28325198233342	-0.355650302674921	-0.180097796405654	-0.287546834317628	0.398005609272918	0.350632228484477	0.361939710931019	0.211779617035816	0.487259243341127	0.172629539374778	-0.197327968643082	0.181382703043259
KEGG_TERPENOID_BACKBONE_BIOSYNTHESIS	-0.22173631990005	-0.314108826142286	-0.36827426473729	-0.37552824277434	-0.242245672886955	-0.206092274982734	0.612030287544349	-0.289576724804901	0.502443368729615	-0.714767503590323	-0.350266922939526	-0.66344742368667	0.606065407443339	-0.273881768565504	-0.395573857160502	-0.402963077377231	-0.582083167841921	-0.592462806620432	-0.262698516012998	0.523928890221637	0.5526826226487	-0.314922542595334	-0.584214266083266	0.344805533309485	-0.171944177849864	-0.332265739084495	0.439192031221089	0.685746036412149	0.500222380229728	-0.694396386064898	0.522024393649293	-0.496661470491174	-0.52573758311286	0.58294888292178	0.614128103371898	0.202613549860443	0.577933445834225	0.611273075984753	0.655542733929954	-0.427551072284977	-0.565556258353412	0.314130829283059	0.29910108182155	-0.378931575911834	0.378092437749226	0.455183333598894	-0.584107317442364	0.228012829015325	0.237876744602605
KEGG_LIMONENE_AND_PINENE_DEGRADATION	-0.612482917351198	-0.532253055890935	-0.624079988832531	-0.577871757025285	-0.586703280533793	-0.5193692810507	0.435047530751434	0.349711752994948	-0.508226402208178	-0.446159157445162	0.415279002497827	-0.225174381737488	0.90631592699285	0.19372225745083	0.273816555272007	0.560444546095276	0.23165072693449	0.442439693887283	0.615530606805923	0.529757855843971	0.36440446484792	0.768888427048324	0.258881226060032	0.323018389346817	-0.337412610219367	-0.226632847178198	0.450845322378476	0.518833323134884	0.291249207355707	-0.340098199718209	0.540864463798545	-0.335222107177956	-0.476744987364119	0.328915662650559	0.398843757231111	-0.168864933417889	0.31049999562031	0.636279491686128	0.421365484107491	-0.357728633708013	-0.367496032766377	0.611519452850711	-0.214839812983417	-0.195561192136978	0.298204802710244	0.506831853426123	-0.284147114774905	0.286620164869972	-0.236905516804071
KEGG_NITROGEN_METABOLISM	0.221797012692378	0.177946182705707	0.187782074801094	0.241591291501767	0.261721233029078	0.218882908959997	-0.253241105162999	-0.343784633747018	-0.27596622197549	0.318312616928826	0.309864540302595	0.302336199278024	0.513783386853433	0.27431781428111	0.48581028732688	0.469281115341172	0.467887073457749	0.427492352798652	0.454578756713285	-0.157433402330023	-0.385105829777944	0.479341860013806	0.509619014545853	-0.370325862660681	0.296320408064144	0.212268950449832	0.298148107121284	-0.369678404706278	-0.47859509425603	0.391361795630844	-0.178392821641584	0.374947801628165	0.132370743522655	-0.28494544871318	-0.403985999067328	-0.526082875956655	-0.307848711104359	-0.293746659412148	0.20802204409929	-0.150644377632192	0.226330112216024	0.319709504968827	-0.152813189334253	0.321395868496252	0.380842280028437	-0.395182748916585	0.236949254802884	0.393633881520537	-0.160237180847526
KEGG_SULFUR_METABOLISM	-0.318058330589111	-0.376710372558251	-0.242581018426913	-0.283004126379103	0.201813915139232	-0.406413416152759	-0.251917867234443	0.468651946395888	-0.302530898607935	-0.289526612727951	-0.294303180799667	-0.417872918855156	0.554130245685332	0.4125738366976	-0.447838916299879	-0.475845296763695	-0.420321985308134	-0.455970908971288	-0.469518568148876	-0.274370520707786	0.487989115520153	0.467432203305389	-0.31473036462611	0.230439189559035	0.226753961726555	0.56208580399891	0.352633117040105	-0.311571315642847	0.225136726533253	-0.377188301226605	-0.282755349473841	-0.485779535341433	-0.405953753455953	0.308957238726219	0.288817043974676	0.629781707927844	0.274218978796409	0.318470310775608	0.267430091908249	-0.442434222053295	-0.414372422695074	0.246429932175784	-0.195344707300042	-0.37646553427601	-0.546104423472087	0.209551595103703	-0.382094664069048	0.463283412344322	0.344660078966624
KEGG_AMINOACYL_TRNA_BIOSYNTHESIS	0.434234525815564	0.417422290626027	0.360448104257827	0.375361067917591	0.394708461830208	0.379730718639339	0.510419928031961	0.394104845748154	0.277224390444556	-0.501833051143588	0.322401604741521	-0.527861598458263	0.337020843987233	-0.241664951159078	-0.580686911306194	-0.375146254754508	-0.568352039074953	-0.561462636024165	0.210633396608719	0.568951880664643	0.50815358543895	0.246430907820709	-0.615070537161632	0.179520303975848	-0.180958555546697	-0.367000175845374	0.169609551592469	0.590837416151288	0.518512569015077	-0.632623721621075	0.418269246867532	0.205463782654351	-0.432470621926237	0.142126315241405	0.400298332701842	0.214164718691935	0.532037250835773	0.58757357245883	0.457728843221896	-0.528823395003151	-0.56536840281915	-0.290322206827675	-0.300084181903015	-0.635831417779649	-0.303751444246826	0.214325596593093	-0.574306902136373	0.301615400978432	0.355045515968914
KEGG_METABOLISM_OF_XENOBIOTICS_BY_CYTOCHROME_P450	-0.363316927145317	-0.415872332616196	-0.534361477677325	-0.475917737281058	-0.530529882026504	-0.501512224746542	-0.420883671772623	-0.319463857501492	-0.372194950789524	0.314684208569248	0.259757460909598	0.464478081354355	0.762784853685707	-0.125656540071244	0.499613356233889	0.342892259355244	0.425223685933692	0.409372754496113	0.257508306736919	-0.408561565604525	-0.230775299017059	0.725024468940837	0.526593403258612	-0.218996636069859	0.12682253971108	0.281639168116759	-0.311471952709289	-0.29505248281688	-0.32820390070398	0.471005377143257	-0.289830084674981	0.338092891065659	0.240284383507044	0.354436071377229	-0.185531110044558	-0.369724414014986	-0.286262745904756	-0.220271172743446	-0.416285540956491	0.371250170675155	0.429518362304664	0.482681516022535	0.297734956335266	0.425775597396063	0.209045744114896	0.203658753960637	0.439327862291502	-0.237541154587593	-0.301884158834709
KEGG_DRUG_METABOLISM_CYTOCHROME_P450	-0.358215824789158	-0.388467068224603	-0.512614904764346	-0.401033080909944	-0.481705005355282	-0.470068592008763	-0.419704888714236	-0.294584768734279	-0.400410210602759	0.356445073158304	0.320553782202554	0.463888000056197	0.791865859391978	-0.163363436431355	0.485619059613674	0.361686216004005	0.427873166769004	0.416138059589357	0.290834561771695	-0.429198780383229	-0.288842472171031	0.734652125561194	0.515634624852608	-0.270018567082454	0.130112400162488	0.243108534181596	-0.268364743068548	-0.328558019804194	-0.380203920575348	0.478805601805989	-0.294954412895477	0.387962698963067	0.271091830505502	0.371875642835096	-0.235761580356469	-0.370111671574153	-0.371232531708671	-0.188871888059185	-0.510234247837681	0.395862985563945	0.432695659461492	0.549498595458362	0.390223507047806	0.45836788426287	0.222531154539505	0.194005031804669	0.437370182271533	-0.27277682585724	-0.240808076714265
KEGG_DRUG_METABOLISM_OTHER_ENZYMES	-0.205282613041744	-0.233401055545684	-0.381715077950321	-0.263296772865186	-0.314262957729247	-0.287531500565805	-0.195683678591683	-0.465312053045796	-0.298994222852388	0.326866222570301	0.302702089548729	0.189150575736547	0.684816130593191	0.215613677859749	0.363563924304382	0.310719488396543	0.35155075689916	0.32905639480683	0.293020658169731	0.212596770948981	-0.306586498392268	0.652403251810339	0.411578231457953	-0.202148254985586	0.177553007000066	0.263899181479927	-0.542095934053819	-0.157385076230412	-0.290099202089601	0.255814516091098	-0.225262097796101	0.277205675038857	-0.211316806947542	0.432768057880593	-0.229113848152294	-0.459854738990699	0.162660988057294	-0.247134838657657	-0.371721102251362	0.221483856620414	0.198594963062723	0.420598868012743	0.280158038696088	0.291118335851998	0.216661356916619	0.277647097723658	0.155858856377614	0.158390583363489	0.146752166576588
KEGG_BIOSYNTHESIS_OF_UNSATURATED_FATTY_ACIDS	-0.235885966547923	0.143040194350653	-0.262021282995574	0.236010066547387	0.234339341729726	0.327729297362458	0.240907721197115	-0.446435738592532	-0.190748143917757	-0.238457354254668	0.445641275267502	-0.205501960558655	0.665804359370552	-0.234528566243867	0.171076844977486	-0.289731782554227	-0.218129669442897	-0.404076857968648	-0.343524837417754	0.265377894970995	-0.168538612856142	0.618526001254521	0.20185290944858	0.142658223896886	0.175634285739755	-0.190849022401055	0.239553246257198	0.471673584378533	-0.342407813414783	-0.289421917634361	0.274041420452443	-0.164740310215579	0.154987985720957	0.329468519636368	0.393102394273367	-0.279045301242263	0.395741849740207	0.388001774905646	0.425546819052608	0.25840960665506	0.157042068055815	0.567800119149894	0.407253774246959	0.260907445157241	0.267440503041957	0.211634289324044	-0.323733274837827	0.466629728188235	0.153622674474701
KEGG_ABC_TRANSPORTERS	-0.153761328013194	-0.188127672083988	-0.196083045992443	0.223100176044187	-0.262556760134979	-0.188796238946749	-0.231202686627299	0.176694619319041	-0.316122168463867	0.433236221918407	-0.197582850317855	0.372535300931605	0.533773360099761	0.273925503984667	0.421752355936035	0.325285885446289	0.38626212904221	0.399353963099276	0.22305953271071	-0.490993307786293	-0.282774799795474	0.50992872749941	0.194292318454242	-0.222664055840463	0.236781470029537	0.129121147435324	-0.412497980845188	-0.425947116167099	-0.289669083722105	0.381897038151076	-0.268410311339083	0.138995391510312	-0.176526475857518	0.195081288120513	0.225236067836934	0.198497106456849	-0.343857388540973	-0.322658627581818	-0.220219457404788	0.18445476820281	0.319296859564805	0.33927236367087	0.162611826887495	0.256325661915952	0.180396118470751	-0.240192709708619	0.328150051346012	-0.275120871875812	0.17751566887249
KEGG_RIBOSOME	-0.357188110767397	-0.27490594121601	-0.242752376051014	-0.291243059628156	-0.204028069106313	-0.326252914317944	0.727085535699518	0.526377168421725	0.13215389173753	-0.537416173806322	0.20860333845289	-0.495827345707903	0.321591953947902	0.549575614178823	-0.495013642767668	-0.592860174117193	-0.634491489989854	-0.599407449186259	-0.55439995670234	0.66380413720893	0.63863151288195	-0.494064044356045	-0.137785555977515	-0.438878940328512	0.616429531270907	0.566308054508662	0.534129284878967	0.825824402886189	0.768358889949834	-0.633948151179546	0.408869474014899	-0.56518561605538	-0.613219809077906	-0.284764949861245	0.335822685029012	0.171162283721012	-0.32528139640874	0.753228329570591	0.425145582812735	-0.659205829274934	-0.531758434093081	-0.482695283063769	-0.656133005307571	-0.635201938084141	-0.509342937903925	0.653863368898808	-0.575279935509452	0.338102310536338	0.622484944440865
KEGG_RNA_DEGRADATION	0.301900611157711	0.335073875769624	0.321369897222948	0.15452096324156	0.218426457141278	0.276611677034132	0.414494306068175	0.10910444041765	0.337384544229142	-0.248871728589693	0.310686252517885	-0.530758801450256	-0.253514696115386	0.375025751246987	-0.625672234172489	-0.314420052334754	-0.58823374315157	-0.540171823328008	-0.219905264406235	0.500568883013492	0.343845120416799	-0.338624073682131	-0.428098529154158	0.317918464821789	0.467217443022338	0.182873304148964	-0.166999698040157	0.459671015206526	0.57942563969705	-0.537189386598634	0.501627187672326	-0.31514943199712	-0.206989417597594	0.276143539523116	0.305606004624737	0.148597658670503	0.549147020596131	0.418237580079606	0.347974808880233	-0.389017839326683	-0.506996709983534	-0.291250913119788	-0.377957981221624	-0.41926971802217	-0.355776160329288	0.367317280752855	-0.660335778094105	-0.301718137149416	0.227091367944142
KEGG_RNA_POLYMERASE	-0.238418251341277	-0.182671697068343	-0.194463843565475	-0.221370485543183	0.176887387144381	0.189419885706801	0.6167457714129	0.392401367907934	0.472785282999531	-0.567233891174314	0.250029815419106	-0.502187315378772	0.204087850133626	0.228140897583662	-0.618510841648811	-0.456295877810419	-0.565464682975048	-0.548828982278045	-0.402216383994596	0.584842756412262	0.554459526196845	-0.382756921070784	-0.524508821680822	0.307374049575916	0.370025276306409	-0.187907985406674	0.270142416833715	0.421143655489525	0.573896149057968	-0.627436052705274	0.452999899577547	-0.355819136659384	-0.47280041123602	0.316301644675265	0.535593774220457	0.318690277163147	0.54583070588289	0.529430747635991	0.345316127548735	-0.61864155329146	-0.642062203984198	-0.623002767484728	-0.571746351399326	-0.678530415314042	-0.42521800199268	0.561403994432695	-0.51899538653845	0.481828357679005	0.562334189646297
KEGG_BASAL_TRANSCRIPTION_FACTORS	0.310135655074717	0.350386273505054	0.344753750089622	0.25885904828915	0.383376405294646	0.321651698179225	0.313994599323221	0.215523884721773	0.319699746420155	-0.386588075532127	0.226476939296762	-0.481798948887597	-0.354577243604265	0.352837806967695	-0.558677643942177	-0.342271215171958	-0.504246756395271	-0.424693913970111	-0.356451630891028	0.513245863150256	0.220423505768625	-0.398493763260231	-0.336823380460782	0.353883592509292	0.325882105541694	-0.237174534574236	0.174557099559557	0.408249141549565	0.31050499410355	-0.431752707603638	0.503609244243388	-0.281012779881289	-0.140240516024176	0.303808450288076	0.221760190977552	0.189199719390992	0.52074371429314	0.444843643288768	0.339162140105958	-0.403099146028909	-0.5400978239571	-0.41424096576497	-0.536224141611653	-0.474535989465668	-0.38123276367681	0.304443367398107	-0.498542107103767	-0.328168400670976	-0.182419823305849
KEGG_DNA_REPLICATION	0.321358979715335	0.381535015661635	0.263695925177112	-0.364035501771252	0.116166429112112	0.285390401842814	0.175601728959444	-0.462205522350013	0.671027290613043	0.392950939195509	0.350921286927298	-0.553877641142993	-0.283159382404291	0.585394131685671	-0.546706077254714	-0.498541087438649	-0.580963030427162	-0.591470917434146	-0.407069212082679	0.397754362087722	0.212647773659892	0.136398875553689	-0.339091549099509	-0.151178301467314	0.719805448540965	-0.292340285523765	-0.434376346988355	-0.130765055928313	0.388409604314439	-0.523700742348752	0.48057714809305	0.580972183809547	0.512384442308211	0.553558924729349	0.275267109283811	-0.488558330837546	0.670831618212056	0.43799496224652	-0.340473012400328	-0.576895347962303	-0.561888831503597	-0.274227689421982	0.117289634457745	-0.49593609758288	-0.276812195938677	0.181476040690378	-0.502174937991512	0.442050021517161	0.276297041527201
KEGG_SPLICEOSOME	0.385829495727976	0.41706515385416	0.403880913130399	0.250215128472387	0.391774685766942	0.440644774484994	0.483042119058426	0.261859919401445	0.470999443940773	-0.497648265248729	-0.270459997051404	-0.631714865222778	-0.194140192619412	0.494602400794458	-0.662204281625238	-0.552205617689819	-0.614902198622816	-0.650377189961432	-0.497388375906304	0.387195342654563	0.435828653057594	-0.573245702206485	-0.564236128771602	0.393383463967175	0.569740314530473	0.265696459469563	0.268345925943965	0.544357205532393	0.550398061805814	-0.63749613587542	0.498660652987218	-0.372247067231581	-0.362900403877317	0.428528053521519	0.265427665527678	0.290173057199999	0.572138342781518	0.494041663329572	0.431743794153253	-0.576496189395548	-0.583447653512012	-0.494126213953318	-0.557255022126984	-0.542332099346715	-0.522162684533334	0.406291003174777	-0.668370502521814	0.325941917036995	0.329169544855731
KEGG_PROTEASOME	-0.360838942158382	-0.293185544178185	-0.374386096704945	-0.417274984346255	-0.369651593925795	-0.221083544443701	0.383827376227318	-0.139416661371288	0.43881725536864	-0.513747796367844	-0.330584943356072	-0.643259483871198	0.470864645392629	0.520904820988525	-0.569892754169915	-0.586650525689446	-0.600249000131952	-0.608498015611506	-0.576369085398772	0.488341553912267	0.50449593343853	-0.397611671358491	-0.38212344175571	0.683922721391396	0.649410050571875	0.270220815607424	-0.158232116507462	0.498746522278122	0.583565682986534	-0.511277643732358	0.682028000494291	-0.568893209813127	-0.547523530379907	0.346632940800269	0.633703346230214	0.491864734851537	0.56771147606188	0.354978480760351	0.565333079149898	-0.591619113701507	-0.653753238066969	-0.465710234377854	-0.476091760189358	-0.453318856091861	-0.371923992968285	0.669070244054982	-0.568406498515405	0.350959041084324	0.190354073383553
KEGG_PROTEIN_EXPORT	0.232313240886406	0.3106829016629	0.160573370536878	-0.19667449387573	0.273435952336623	0.209846776964049	0.626322159689612	0.199331330179975	0.46068958249543	-0.596917468291898	-0.310370133150132	-0.647843673508655	0.666328419835418	0.223053431679111	-0.616465121914789	-0.434520809672589	-0.61541904708254	-0.579136520473244	-0.404602218147798	0.5196266182677	0.471391936616676	-0.39164412321089	-0.475146703273942	0.538468144621671	0.423257598359854	-0.174610569002577	0.531339979939448	0.573925555718973	0.401699452634784	-0.444881430294952	0.525388375943589	-0.445722003758308	-0.445028350210037	0.540814702871142	0.605170845689117	0.498836529174309	0.331172683571924	0.594454268715093	0.612298508265458	-0.634300670617941	-0.670557082302527	-0.404096040425136	-0.467716954176197	-0.457637138656442	-0.484798481056175	0.5237138717488	-0.550481302760873	-0.221727353742349	-0.275280074017834
KEGG_PPAR_SIGNALING_PATHWAY	-0.272614300901521	-0.274462769062192	-0.321096447606061	-0.215335633898869	-0.307335907218569	-0.266547023482691	-0.227972213777706	-0.344372244099148	-0.356701882381342	0.286987870633037	0.246102760736507	0.211938470890718	0.612166683799046	-0.172783141432286	0.331730346378891	0.320247206501892	0.355725518691556	0.32963310058003	0.222298032582273	-0.229914411317	0.188795780814563	0.532600317186762	0.326253157861001	-0.144109808426725	0.172489411088051	0.207634841591818	-0.262390553324353	-0.210624620061634	-0.304524048231438	0.254812243636898	-0.285743873523293	0.182253478468883	-0.205428151784798	-0.183323658523999	0.304428603300101	-0.306219207683547	-0.247494537306767	-0.205427477357545	-0.210874150584351	0.270949815848245	0.350055792155765	0.456151417447086	0.30132225271809	0.3503625801547	0.180804456460308	0.118654281171749	0.222570415687373	0.143935649866197	-0.227743083409493
KEGG_BASE_EXCISION_REPAIR	0.267065994886888	0.224323850497511	0.188740892102902	-0.186268564228099	0.172185943428295	0.301110166330939	0.426730513982752	0.184292535964943	0.538832263468128	-0.208916416313032	0.28713610495073	-0.514152812035362	0.299658500719799	0.468395520148528	-0.594494737495735	-0.483593791806355	-0.523881773984182	-0.555608367407992	-0.357449230902698	0.402618483409972	0.270234936807652	-0.291637386071965	-0.383427352321783	0.207417756890618	0.550564661716446	-0.139781531817603	0.178149605266615	0.364522216638045	0.359877340742952	-0.557037638188482	0.389191497818613	0.284909788557924	-0.280358878966228	0.494369631159307	0.38592103653217	-0.121015385205641	0.466595393302233	0.486285438789592	0.194914391201057	-0.482644180250682	-0.548830017312406	-0.398257907233236	-0.299164056397938	-0.495929746217243	-0.325843894783396	0.299927529224078	-0.589135768017634	0.376787982689756	0.351493500847708
KEGG_NUCLEOTIDE_EXCISION_REPAIR	0.236468668573631	0.242254800760441	0.273432942020393	-0.135443409719472	0.197975835343146	0.241921939752199	0.395179496659027	0.165090962846476	0.497214547028125	-0.16980898864111	-0.201202269109397	-0.490615630531214	-0.14251934498147	0.397422816702283	-0.601964596107827	-0.449891782647593	-0.516590954403592	-0.559804337124858	-0.345991006512548	0.532821971710211	0.356750542633191	-0.107708038314213	-0.340046772735382	0.266731430480739	0.537779899485002	-0.162560177201661	0.245619766301831	0.356590574344442	0.43522423182885	-0.523248580184418	0.528883922148097	-0.208327066459609	0.160864890314634	0.285546589829419	0.280515575824837	0.135572955085596	0.594501412551588	0.458367514636562	0.308076025518592	-0.569684565107561	-0.581132807814484	-0.395100141205521	-0.367855078006577	-0.566445918932631	-0.265586997622038	0.219883672701584	-0.489407476118448	0.169938465398902	0.15645146361837
KEGG_MISMATCH_REPAIR	0.256679178184815	0.316758995226962	0.345039048920621	-0.195408025629202	0.207231855208626	0.32669340348704	0.280156584088044	-0.32051624845572	0.511252951653312	-0.242345961801478	0.341802272512924	-0.576606795660619	-0.302546011539769	0.384475566181236	-0.619489525086223	-0.470625213183785	-0.589456373232037	-0.654251315715247	-0.326971244285902	0.368483202280612	0.261706079351689	-0.165461288790959	-0.477808669721913	-0.151053566895148	0.531904069803964	-0.365338008491363	-0.413745276018386	0.280356970085151	0.293928613713736	-0.571266446263273	0.451789392030398	0.463145562801246	0.426024172707572	0.426854415245391	0.222854434860301	-0.384610403007652	0.701417580142037	0.475927869829336	0.236843566598149	-0.414381696218813	-0.565145194917939	0.23362671696863	0.300762259701735	-0.411490160343973	0.22405700380344	-0.162273686077553	-0.588315946952304	0.29772457454059	-0.251612034837135
KEGG_HOMOLOGOUS_RECOMBINATION	0.337999001862841	0.323360898893423	0.338150025639507	-0.323922113692128	-0.15382875621847	0.291498019022429	0.148247883578412	-0.340238111764049	0.533396828667518	0.436064182686124	0.245429247849909	-0.442826935895727	-0.450769882689589	0.433993741482443	-0.454910560567992	-0.316618029875082	-0.398730252426299	-0.485683380438368	0.200439078365163	0.330093733780042	0.183680085392573	-0.269987145102562	-0.275153159236766	0.195899639527018	0.540486060467345	-0.347820061315616	-0.503976369732119	-0.278565952154364	0.401384663429406	-0.40940962928855	0.349566854958991	0.450948550582596	0.346630245575759	0.207077962181209	0.215891328108883	-0.362333219839992	0.499468450570998	0.375291188175748	-0.289156018327185	-0.388645781439248	-0.428979349021312	-0.192717080374963	0.211056801360499	-0.327787203400979	0.28627757580398	-0.141609522883764	-0.514506931758497	-0.222344737631835	-0.28083556710617
KEGG_NON_HOMOLOGOUS_END_JOINING	0.213895334304305	0.26570351005295	0.211664613891399	-0.400379909438822	-0.224713389382295	-0.254074966702581	0.31749159290696	0.296873461372817	0.487755068220612	0.346989497707303	0.314881837712291	-0.390768157124786	-0.257418518858285	0.566367382279794	-0.575895692496336	-0.274998839633015	-0.395997196610321	-0.42757036408334	-0.272127130057636	0.504149616136317	0.430737227931767	-0.279111454536504	-0.220410008561386	-0.255026320796575	0.535227547516647	0.450446647213266	-0.283744076025023	0.431634284929238	0.460384327205735	-0.406785676724776	0.382631113147734	0.297748822812335	-0.159490854583297	0.312594880813132	0.4314982462582	-0.273264867261292	0.32811312860022	0.419449585806983	0.39482886395996	-0.239925205428058	-0.469960189544311	-0.292763022063052	-0.304444054555301	-0.363976367578875	-0.554538439163641	0.307451945305657	-0.333176574888661	-0.315694580459932	-0.365895914026883
KEGG_MAPK_SIGNALING_PATHWAY	-0.193799900366277	-0.192910445432522	-0.169563443470968	-0.180168237546556	-0.189745932911875	-0.202655292098839	-0.19819009837552	-0.143647417094633	0.148335197217724	0.193725067428707	-0.175644244778648	0.242270648247192	-0.228799950251892	0.187242935303043	0.208229759571299	0.181481907313577	0.232723233959227	0.22362372856795	0.150271400220565	-0.196487525258876	-0.137872954217634	-0.196865669421262	0.234405751192868	0.172199010441464	-0.164689038816339	0.310193160435198	0.157815774263303	-0.208478519952648	0.156513872168679	0.205236102767756	-0.192346395880768	-0.203478447598145	-0.191797792401553	-0.165129455189243	-0.195975644658349	-0.156424475426424	-0.181102930059119	-0.208051269391078	-0.162254346258352	0.204652691664857	0.304726982190494	0.163355170339746	-0.124085790876584	0.170497376260205	-0.190457244740115	0.144001095255035	0.20555914456478	-0.169610575412952	-0.185946423223077
KEGG_ERBB_SIGNALING_PATHWAY	0.158080548686392	0.198875716266909	0.148631848586828	0.197337731305212	0.174398081401241	0.227132187901617	-0.234163906389394	-0.158454121370126	0.229335719459037	-0.207970130795193	0.227601663793563	-0.124090937158206	-0.313337462331162	-0.165240108378609	-0.205234777611181	-0.192938022630808	-0.159831423765545	0.178197826780374	-0.230745176561134	0.283103160197877	-0.200814979216965	-0.212941965501414	0.199112692350695	-0.140468632530829	0.186203988304785	0.25722171672087	0.179141932447244	0.136649920878016	0.159877022983652	-0.234943815721499	-0.182407815638069	-0.207279667539603	-0.173904610902072	0.241242727197862	-0.163259980309221	-0.217958206600827	0.241558868774955	0.243174297954982	0.144937409679562	0.239837626865502	0.188410581914709	0.122402355295997	-0.204771624211513	0.156360028354526	-0.17566977210566	0.217820900077674	-0.180354713511692	-0.196975519691112	-0.185416092536456
KEGG_CALCIUM_SIGNALING_PATHWAY	-0.321596315083148	-0.280731161631976	-0.232583948188785	-0.205155206473389	-0.247251374716209	-0.271522645382072	-0.282224456751093	-0.214671281874761	-0.247890267604285	0.287955837130843	-0.248311391192998	0.34653965435182	-0.192802081761419	-0.286929429019867	0.393673181379161	0.294812750555563	0.391165893783241	0.349241235323295	0.206107709705008	-0.327742016335021	-0.253449595587125	0.21325272254693	0.281014674815342	-0.256241316947066	-0.265282736067715	-0.195290897783525	-0.213461331090953	-0.31849077585119	-0.313169782547537	0.397232116242076	-0.288222765282666	0.199665218540466	0.235663648225097	-0.218187014353195	-0.258644086601119	-0.216758535631233	-0.341548888465523	-0.345156647143027	-0.280037266935352	0.145664561634862	0.320314125926339	0.170404275349029	0.144803026478322	0.204401720990976	0.219020776096736	-0.327270733089926	0.395030147946031	-0.180950413859347	-0.17390778958743
KEGG_CYTOKINE_CYTOKINE_RECEPTOR_INTERACTION	-0.467140722890984	-0.462879137924609	-0.457695368075994	-0.42219462680896	-0.444461875431041	-0.463475701679736	-0.405113852111069	-0.151273148415056	-0.259554969455103	0.394687544606025	-0.199779811079831	0.451055288355353	0.259718109101707	0.320778532872196	0.490718525431795	0.286038114196068	0.426907239827054	0.411580761008329	-0.137199189690649	-0.254869611979484	0.228645395625271	0.221142733195613	0.462553170885014	0.248120334090931	0.253520261942824	0.395711420112577	-0.254955376032407	-0.434020069765494	0.368405590442228	0.569320485345356	-0.314210124858571	-0.132282918161638	-0.226378804659727	-0.423471059749523	0.287232169449198	0.221626341952608	-0.454716185104759	-0.422585397637034	-0.274151932256327	0.326202227186685	0.488641291065	0.332771981247608	0.257806195706813	0.439564768191787	0.170025743060886	-0.208935595845514	0.472453706204192	-0.206946848333054	-0.335524233714428
KEGG_CHEMOKINE_SIGNALING_PATHWAY	-0.309768291674818	-0.269146755118242	-0.290750714114112	-0.285806513291858	-0.284509037836241	-0.296990192256857	-0.221183053492287	-0.146449110821872	0.162689695229752	0.316539687631118	-0.157189335295892	0.19106524131796	-0.143895623883681	0.366306471650996	0.158523002587329	0.150505220469826	0.1932489364277	0.198906382911508	-0.209803025797361	0.156888628377318	0.17484073187351	-0.130692454627688	0.373669694413603	0.236809748423774	0.332512215785485	0.45692790843496	-0.163906101057388	-0.292505229470348	0.387937849499533	0.324259771379122	-0.257624183089008	-0.226934183394988	-0.149762079960025	-0.19404509696278	0.276519560673215	-0.182757206198167	-0.250295771022103	-0.29440282243219	-0.1187622652417	0.187968537303214	0.310301400951336	0.161706450916736	0.162408043519504	0.263420767129572	-0.156634318214029	0.170049521599429	0.203861107943076	-0.153229864018349	-0.236444191673974
KEGG_PHOSPHATIDYLINOSITOL_SIGNALING_SYSTEM	0.193882474297424	0.241166421587014	0.254176000919105	0.304498240134424	0.285051148751155	0.283333626202885	0.197672369220984	0.182708193132721	0.18135364975242	0.321964983752143	-0.233324164113768	0.216877737379302	-0.321835957576538	0.262012941769403	-0.185786454139923	0.174446949307973	0.158544673494269	-0.153637651789739	-0.187213338276812	0.212235340334502	-0.18244085019528	-0.253772238050822	0.172959618796698	-0.215272613247175	0.184162110017721	0.310850990766272	-0.225351346997622	-0.219453902186268	0.186237501547803	0.186066381400087	-0.339077985992791	-0.237925973797893	-0.271688797749516	0.196818176114294	-0.118871102186138	-0.20861151976162	0.188406074885702	-0.22695742658299	0.188954215662941	0.238734625804395	0.31290269409227	-0.252967238185761	0.161944428818788	-0.209429396153419	-0.178704601759588	-0.198064479485458	0.159814006131982	-0.227692876358215	0.228820986885334
KEGG_NEUROACTIVE_LIGAND_RECEPTOR_INTERACTION	-0.376070865367526	-0.351970885568046	-0.29943360529499	-0.314123003459427	-0.277464471087795	-0.331695045292522	-0.436411748131648	-0.487892779051232	-0.320212562513071	0.399753795373989	-0.207105688892351	0.469788559618988	-0.229870800582095	-0.377424150982127	0.631390943383706	0.357479908801108	0.555594202041186	0.465658818543364	0.210368127829219	-0.37705364879547	-0.416254967980336	0.296542820082106	0.498309765582283	-0.376700639701706	-0.325296504104303	-0.235168563313893	-0.400109973451967	-0.461373001069358	-0.396398409554275	0.574135214944266	-0.407295820525794	0.311425861107913	0.396053429165366	-0.370254095651961	-0.370388424747872	-0.427835555804125	-0.462176425990308	-0.519799963136168	-0.415364436678731	0.240091146354117	0.359131614693535	0.225292739721337	0.229087253729488	0.308178466932761	0.323849415093544	-0.43124574699442	0.528376391711624	-0.228035352595097	-0.29093459640436
KEGG_CELL_CYCLE	0.331202952386501	0.371423208550382	0.288164497920749	-0.150609179062401	0.257086712669315	0.34154615381235	0.163744976857412	-0.3845604453873	0.403207980365966	0.292248632813375	0.232490358818033	-0.383929309230364	-0.345829911451864	0.442287813256062	-0.389690767769214	-0.358008805856406	-0.418955225585861	-0.405867336135033	-0.248110497522822	0.329676535607913	-0.14873392122696	-0.195124560776167	-0.143906559847239	-0.119037871836932	0.513565256011292	-0.152130087217499	-0.377837735630059	-0.151682023086693	0.230566153700014	-0.37259345122072	0.188748125909608	0.321976630402421	0.33988135355356	0.396121624446529	0.211881214729762	-0.320407336941855	0.436391903577712	0.27593711486099	-0.174481838777167	-0.354803828414374	-0.361847970152771	-0.145215076293122	-0.161263150134203	-0.270727101810494	-0.138127476474792	-0.155601286718527	-0.406894256985613	0.251195905437672	0.132906290743988
KEGG_OOCYTE_MEIOSIS	0.238615823671095	0.324480952449494	0.24389469436648	0.166385074145347	0.270028438347581	0.339679352237402	0.285668850696623	-0.266581401933272	0.266459150419657	-0.149474647437811	0.170863920219562	-0.339448232034091	-0.233154269128771	0.251212252365672	-0.311591671904831	-0.251875881103784	-0.322675778064385	-0.309827978637684	-0.216919331793896	0.184321390748566	-0.171461836020858	-0.220146252051965	-0.192991313842266	0.189085656840696	0.329355541266013	-0.146555338631956	-0.275089720847832	0.170289104381239	0.204810984623231	-0.317955593259372	0.201885320713065	-0.195038744334914	0.19518306782866	0.340046405007159	0.211836920461554	-0.263736559116574	0.317400951873361	0.238525252801672	0.166602529205875	-0.306664340180914	-0.250808233658784	-0.245897360407919	-0.306463797496669	-0.344514473290827	-0.211228016935535	0.140879410404378	-0.282610440133669	-0.159180424012075	0.172733712409906
KEGG_P53_SIGNALING_PATHWAY	-0.197441370961784	-0.224992523063785	-0.217494045475536	-0.260230208889221	-0.198732031579503	-0.209581888889525	-0.292372266683252	-0.210816047857496	0.271229448611693	0.198278532258777	-0.204643673146759	0.179209951961862	0.152307690600567	0.317685758817596	-0.15823823590525	0.20077415034732	0.197934359205052	0.216691106343177	0.168368479312518	0.217144129113802	-0.195238994023811	-0.226344866808115	0.131178536871454	-0.213389026399522	0.325118801185728	0.228753686744214	-0.289601428120003	-0.220944274867641	-0.200937309526466	-0.230821116095524	0.217269174205053	0.196173019739719	-0.243685423001383	0.343584536783401	0.248375310583431	0.236989619740577	0.347566398839047	0.201257170643827	-0.357119803097194	-0.23625905300394	-0.189496222960219	-0.191740402729586	-0.210080945339261	-0.166398085345328	-0.302604102785862	-0.148071526562939	-0.373360953230505	0.284610618989433	-0.296279602643904
KEGG_UBIQUITIN_MEDIATED_PROTEOLYSIS	0.198250405614217	0.221443957986604	0.243725448012928	0.171870841235966	0.24740911020443	0.265848220423	0.316872088909125	0.17042196121007	0.229150751400744	-0.215869207171028	0.164280082783966	-0.350054999883964	-0.283037210878147	0.256764458830445	-0.49857298545591	-0.241332771078201	-0.426991804157726	-0.343803199076734	-0.16079287474918	0.332232221300146	0.223018002996555	-0.280543436864519	-0.239771687887033	0.285046998269129	0.231127251563412	0.196506734614254	0.140735635975934	0.383690895357846	0.346932091599502	-0.410809575679602	0.34448117453084	-0.370726127445033	-0.274671298122709	0.191933849632167	0.22975442036701	0.164611334114995	0.372584306746004	0.355864112251786	0.393053028098118	-0.244782113895898	-0.359417161660459	-0.211207712303445	-0.325756936351029	-0.30366454451816	0.16021243151369	0.290554398608035	-0.398237904995088	-0.235860329727277	0.190731185630978
KEGG_SNARE_INTERACTIONS_IN_VESICULAR_TRANSPORT	-0.175489778643206	-0.128534795485642	0.201101732868661	0.188299970478912	0.167291264098064	-0.209185557809711	0.364751377668533	0.20910889367219	0.349801303097933	-0.287020262018831	-0.38914502251142	-0.495641057488238	0.219541898720906	0.387780565765926	-0.484067048882568	-0.344523685947785	-0.50337140628801	-0.402240402261517	-0.330564539812645	0.360304915488938	0.338902114848212	-0.416837473135315	-0.329739718943156	0.448354270323415	0.377028253052746	0.445908388254834	0.222258267197297	0.381145143265716	0.405866318743661	-0.369086660783311	0.454629663877896	-0.38145781863828	-0.449180335292303	0.198717877893746	0.23646827383224	0.243425990947726	0.423322560972239	0.35950798942937	0.374696611317668	-0.391999755013065	-0.439673576860279	-0.475794626898521	-0.462152032474456	-0.287237982101907	-0.449014555709864	0.461572836957983	-0.499203636428688	-0.288339251975711	-0.246765335063872
KEGG_REGULATION_OF_AUTOPHAGY	-0.275668699943698	-0.244499024633195	-0.315485357374335	0.351399051107221	0.256610698706181	-0.232741941845995	-0.218945765626436	-0.339305053731054	-0.328965277704825	0.37346198137449	0.237228296079575	-0.353341931134473	-0.198149263030989	0.364120517296118	-0.30174036818413	0.221677048231238	-0.224876470290465	-0.216615104719666	-0.278283665658573	-0.242598329006852	-0.251183310242577	-0.210584234801904	0.427090423795278	-0.287930695647586	0.328526734838413	0.29751171129749	0.199623131619824	-0.331756374912487	-0.271547344959402	0.248847812768392	0.413908026568101	-0.283838219828786	-0.289385760350695	-0.264625981405678	-0.325098735497112	-0.428937312555815	0.317082503845352	-0.227589330648016	-0.222824095810141	-0.303754135991816	-0.486587040385634	-0.421673840007719	-0.372166861841058	-0.269529372225614	-0.372625264341084	-0.291143373054892	-0.346231594931288	-0.497598889671481	-0.404906266062771
KEGG_LYSOSOME	-0.131577825316567	0.182379019688776	-0.150337974530684	-0.169210573571319	-0.208206612769501	-0.227915998526714	0.138554823271417	0.259806855475174	0.23446687486479	-0.135752122589492	-0.271644704716444	-0.377339111618344	0.337332288028039	0.377104240665413	-0.454391487683823	-0.389108040305196	-0.327933321275057	-0.309690650304698	-0.380639265547666	0.180752737429149	0.52819943720616	0.126156205212046	-0.146255038332014	0.414648064672423	0.376362142041174	0.447448040264891	0.245576983159006	0.217201598945846	0.280681958251	-0.130207284293849	0.17033700509579	-0.448654350222806	-0.463540410462105	0.178674611087347	0.46402671431247	0.317123070259823	0.219306628598626	0.172315330914985	0.327637681206964	-0.161544239924263	-0.0927818393485607	-0.311762228196694	-0.150241851094765	-0.2957932924536	-0.307423885779958	0.523444546830308	-0.31311947053441	0.298002107964251	0.174263298092322
KEGG_ENDOCYTOSIS	-0.218579907082847	-0.180673192041287	-0.138686247970809	-0.223352201891824	-0.199512447488124	-0.248109143497359	0.21144299592252	0.163782965706209	0.264313151334391	0.187090953797671	-0.170911655584645	-0.174373929041934	-0.200365813014077	0.285906354627194	-0.210703200457385	0.157794157611047	0.152142791948361	0.155279746043577	-0.144987885310646	0.178672365238802	0.189035418645556	-0.171332466796046	0.201658978880395	0.275689760621617	0.238649734215953	0.30243170137657	0.263478152406153	0.149700439066091	0.197874167500678	-0.239572934766786	0.156064379759602	-0.279468027908698	-0.262126153409621	0.161797655037809	0.242743282217801	0.100976690425555	0.219115250354707	0.198815636806843	0.266116817164601	0.148714991171084	0.205185578622761	-0.162690129469377	-0.129318133976279	0.121512917165472	-0.137540664168165	0.336327040932776	-0.216032125538553	0.20229715808271	0.218315162258555
KEGG_PEROXISOME	-0.27140298718135	-0.233181373563585	-0.330240325158575	-0.13214788087449	-0.245327265642262	-0.185850902043915	0.296541765562087	0.130502896798722	-0.191322992087227	-0.277620349888821	0.224697514926357	-0.169892339046658	0.632416964471546	0.156904718083439	-0.162358127428723	0.158084529431891	-0.274547100703488	-0.199167949303066	0.207622653721319	0.285128626559852	0.242562507188699	0.583990195773015	-0.227258676483541	0.170759129054946	0.0955411676209676	0.175711494819762	0.272228900157173	0.313805306845356	-0.115384585101168	-0.304276024173359	0.314211528583704	-0.308251421546249	-0.301746433643085	0.154298071848183	0.323277306675376	0.192970154961028	0.27477455541381	0.306802328437905	0.373830757079122	-0.186277956945683	-0.291177456250503	0.262468821099653	0.164615254094664	-0.175315961874169	0.147995096904992	0.334522862041498	-0.225473240474013	-0.239423711890001	0.194057736314489
KEGG_MTOR_SIGNALING_PATHWAY	-0.221082315762333	-0.197164059644662	0.264835464044106	-0.173534578743808	-0.151084079031984	-0.155706981544427	0.340966854772098	0.132437520129986	-0.227427880284583	-0.260262452190342	0.26714583688455	-0.406023602262225	-0.316009095092327	0.237297363030648	-0.342569441420339	0.332672941356744	-0.259424961600896	0.225097708076218	0.233959710370456	0.279342588294739	0.251824889816297	-0.385339174496821	-0.240851030516001	0.195325945985702	0.207868531192931	0.289245484696483	0.199616532421614	0.257789051397237	0.205885317552276	-0.425788883715451	0.313735413020512	-0.378765430804561	-0.325675203963439	0.194768857825418	0.292011751215208	-0.189211325899897	0.253525818931215	0.317566803261318	0.382449163747182	0.168403365208574	-0.187968054295986	0.220095557410465	-0.227673178470802	-0.22518053270639	-0.266306048335711	0.217087494863779	-0.35311794256417	-0.269105402168026	0.227774267899993
KEGG_APOPTOSIS	-0.323104808451936	-0.329608141547038	-0.321022333600546	-0.311934325497476	-0.312766343331354	-0.352199038885136	-0.222495522621094	0.202446933797035	0.191229859534781	0.285084733941997	-0.271058108777664	-0.18051059788467	-0.143234594591142	0.506041792973699	-0.237592190334629	-0.193242359108059	-0.190030042300662	0.17733184201294	-0.231853148789186	0.310289802791437	0.196094324358734	-0.211507269007945	0.331322201123925	0.290329079867398	0.408930892549582	0.508482576776859	-0.169620220735658	-0.127336236811135	0.357407458651918	0.144043753534127	0.184470217104246	-0.401611446181138	-0.409702414476513	-0.227542815344062	0.392778339489794	0.137171910569735	0.259461869116109	-0.197388220391123	0.138276870340417	-0.205171579917168	0.287329234191898	-0.174620008236178	-0.1997880974747	0.24292829034861	-0.305755506492573	0.300668271565143	-0.218423515444937	-0.214155936388229	-0.245850924610131
KEGG_CARDIAC_MUSCLE_CONTRACTION	-0.206007783092701	-0.191654693395763	-0.209111380623247	-0.172239811813233	0.21660596309309	-0.202841018403993	0.193326667013119	-0.200254937137055	0.186479384725106	-0.314434929609046	-0.321974776832708	-0.233680543374518	0.290922200793541	-0.35234243555978	0.233114337539783	-0.303425433170403	0.238568919254442	-0.303759101014103	-0.244688267350227	-0.343152609394779	0.385332899814403	-0.188717960178924	-0.161501545420806	-0.24138819333587	-0.315331654289859	-0.312724292624664	0.153796794514082	-0.197637024446808	-0.267564473059537	-0.225490955359486	0.288675585649545	0.158821100623627	0.204012353786011	0.169435763028345	0.213555958916765	0.29801490246331	-0.209842635904481	-0.243247715624286	-0.232128554459808	-0.297096354391818	-0.298380173801671	-0.295110545528978	-0.128808951008127	-0.287585245137886	-0.247028330067251	0.248986285021678	-0.223351608490422	0.337716553221552	0.211496632537309
KEGG_VASCULAR_SMOOTH_MUSCLE_CONTRACTION	-0.284848034363928	-0.243767688187968	0.171636398862397	-0.215105429933581	-0.192597608244543	-0.256324930299176	0.170836349025277	0.221008556510072	-0.219267015393654	0.18107703905334	-0.196720082661046	0.282476276664062	-0.163925987196628	-0.197141219577983	0.228413229727084	0.259597141369929	0.34288140990147	0.288609477579088	0.18839917159258	-0.271473802313842	0.179209770943529	0.182929621163589	0.219043972683562	0.162733106105053	-0.165632380417171	0.186989466315862	0.297800652127582	-0.185155834778555	0.178268728628073	0.309472869563713	-0.204949764039414	0.139024540916561	0.191280891299304	0.149150744631768	0.196643919453548	0.276538297696948	-0.220570481566333	-0.197709998802874	-0.13754587670609	0.212412845282813	0.347999099782045	-0.142178541327059	-0.172703027036731	0.136950812810294	0.142006239433363	-0.211152317084018	0.283979321630907	-0.191718575508551	0.156180251686639
KEGG_WNT_SIGNALING_PATHWAY	-0.253701074061315	-0.208075835754141	-0.204392903561606	-0.20944770677916	-0.239022171346341	-0.183435659805287	0.219214621200784	0.26556749747407	-0.18047949445193	-0.153537453999547	0.189409674110904	0.24382921034845	-0.302753442451919	0.177141706439094	-0.216360056692814	0.13558203165827	-0.151297886683968	-0.154064454254069	0.156164274064191	0.202788891711298	0.161985587994867	-0.181714327488897	-0.138906735936027	0.193340616878026	-0.176281858774608	0.1745387139651	0.275057959933045	0.177889743968757	-0.169181099866769	-0.208582472075133	0.152865621998103	-0.239205926401951	-0.157761154942967	0.231345973225825	-0.133567495458243	0.178691538700125	0.189087005511915	0.211204551886947	0.199815376341627	0.296811101598935	0.259010080878944	0.201283462819603	0.163237408829411	0.15797193311411	0.188551608298041	0.239074109604124	0.272708589775147	0.164799742245255	0.177729734111503
KEGG_DORSO_VENTRAL_AXIS_FORMATION	0.259012157213252	0.274469160947658	0.360028497991148	0.299171569300097	0.326856382246421	0.256065023247648	-0.332513419128359	0.394336791307864	0.332100806728907	0.258198067024284	-0.346497882176563	0.32974566985925	-0.424638552450801	-0.279192777355813	0.254674057623094	0.277976567668498	0.352793203872553	0.323343190425671	0.226564779180845	-0.369599186235371	-0.281841534259988	-0.408215673532405	0.359879273968736	-0.368413212076616	-0.370179083804611	0.271919446766185	-0.171497067473807	-0.404643353540254	-0.191450299592034	0.375369739907864	-0.223792725655716	-0.319216141250335	-0.408194801900507	0.238396140771603	-0.277117557027408	-0.237942067302927	-0.256767744278944	-0.434971328833702	-0.340494564757659	0.417301024212497	0.465996428219663	0.225316033374662	-0.228516116685499	0.289612240040446	-0.335052421875175	-0.34312470643633	0.287798032938583	-0.257483138381281	-0.38284576465926
KEGG_NOTCH_SIGNALING_PATHWAY	0.19312070211765	0.209602469775156	0.333576139009856	0.275796145068601	0.280588499271595	0.216561655997918	0.359935253281377	0.360985911446866	0.15866085658251	-0.193233929667651	-0.279989575206695	-0.210975597807401	-0.367565045744037	0.235133653086365	-0.195842295659489	0.166904664886511	0.165072262282974	0.168888020506148	-0.195107830956299	-0.154514295973201	0.253653242783206	-0.302998247124091	-0.247570309451358	0.283567247183984	0.196705824848619	0.291204821850682	0.11447640828055	0.242268219154994	-0.122975640916437	-0.226586939931596	-0.155985895990909	-0.364703055268875	-0.402141657136254	0.190534081427883	0.18229424213738	0.281751448579528	0.190146196435946	0.113401565032803	0.313764863945647	0.17224606888647	0.237235714319686	0.149540917758739	-0.210675733944636	-0.11073198882251	0.16320490440513	0.267088916090327	-0.26309102104225	0.312775785969838	0.391904549788107
KEGG_HEDGEHOG_SIGNALING_PATHWAY	-0.302850024236991	-0.25413455439341	-0.309996672166953	-0.293536259637677	-0.340500895358442	-0.30246475930252	0.278144022818114	0.329702343264923	-0.411594777562946	-0.19826034635948	-0.212875130527519	0.439194617291817	-0.339554063705585	-0.28263227655581	0.341585324006601	0.242257071096661	0.299271798579301	0.261754040951021	0.245243361169986	-0.232183504868498	-0.303451431514946	-0.288554015691557	0.188115960296271	-0.259875856755753	-0.329766026564584	-0.24710266072418	0.202605376339276	-0.211228655905727	-0.265466447529093	0.314265270622974	-0.232854413603534	-0.180204723087964	-0.215830132636057	-0.175788552874405	-0.300380290988379	-0.217417369578969	-0.205069681489439	-0.183287114887386	0.193075303390483	0.294435073946688	0.288843458964913	0.245136303451961	0.287671708698864	0.235443479041772	0.37495519316171	-0.175035436285541	0.485432500256737	-0.159100900405686	-0.188721472131459
KEGG_TGF_BETA_SIGNALING_PATHWAY	-0.285218139553161	-0.235609073716889	-0.126428678833024	-0.256463083384881	-0.249255370250757	-0.258448598668553	0.172896172608258	0.226979602423583	-0.145948451046444	-0.173279193462452	0.22096817790726	0.254221852047263	-0.172865595841213	-0.176745748799298	-0.18947341725581	0.17003209683778	0.219277848353234	0.187717847513269	-0.12346560221599	-0.207795534737424	0.203759753189603	0.310512868516301	0.177076571828545	0.177406734007404	-0.211479174448014	-0.157939713024541	0.239627836429002	-0.175577143247466	0.162540643051296	0.273519118434848	-0.138621298669237	0.164761085325017	-0.154668177463246	0.181884491380699	-0.276917655627028	0.186610058912049	-0.258877040686211	0.269908688912322	-0.251823721052565	0.310935449823574	0.402991473487964	0.321003888382517	0.188540589268493	0.302303674508625	0.244226152337979	0.195417853370096	0.361989400568455	-0.170214530947587	-0.22919948402261
KEGG_AXON_GUIDANCE	-0.247261205978828	-0.240665605983833	-0.173059491106852	-0.198669591267795	0.148180335307065	-0.167062753703995	0.169745083765828	0.207485725259294	-0.16084521038668	-0.23371856489631	-0.216699480715326	0.280412752807456	0.139177460964258	-0.238591713500024	0.191455922861335	0.170724229514469	0.251682269120407	0.294743015091257	0.160903316509212	-0.20254562028495	0.152240351637307	0.209192562321224	0.150413931456144	0.20552618643097	-0.30871930623281	-0.209168167351168	0.16004853106195	-0.215888380168434	0.183531121481519	0.132990421369562	-0.283004121124801	0.222075589144924	0.266430922112088	0.329562946019363	-0.137342486135869	0.127930572725449	-0.159835384113009	-0.20229754747071	0.136768926176957	0.317839626864239	0.377656732707499	0.211075341146373	-0.123491199968416	0.166335846971516	-0.191510931856007	0.195549279438728	0.189720446832264	0.204165175518219	0.19341928063775
KEGG_VEGF_SIGNALING_PATHWAY	-0.213319799420634	-0.297354214543868	-0.244896946478149	-0.180796881899047	-0.201398408778138	-0.282323123097659	0.171025255527857	0.229794217896813	0.15843154873555	0.156316431554896	-0.248583096337398	-0.189355595028158	-0.176523664239669	0.319171129698915	-0.141788733206026	-0.149168555253792	0.155663107463574	0.197225640790577	-0.179507042323776	0.107908139219221	0.189210940523987	-0.28311371419662	0.215358057801232	0.224376768360368	0.268160241274018	0.34326553745074	0.223025900639692	0.230233651996799	0.274810282014477	-0.19794473009129	0.138641746005869	-0.314832079303066	-0.338988490848648	-0.171005981403483	0.272759113097426	0.238950063744878	-0.211543847681813	-0.135547708872436	0.247152142480369	0.206201021438352	0.285503186487044	0.150773143004783	-0.145885238886792	-0.148391088791312	-0.215821987824434	0.264655919539946	-0.197551418009746	0.198221108083723	0.26435921864674
KEGG_FOCAL_ADHESION	-0.265112608218551	-0.270197656070204	-0.143813272881128	-0.287315031106901	-0.284945415695576	-0.344725983816902	0.136098010134703	0.197981869946771	0.205436704685805	-0.138804993064123	-0.191843814455398	0.264728150266584	-0.155756700570673	0.198239251454974	0.258880175537006	0.335050163751255	0.374885775666122	0.314336539547646	0.247549731745301	-0.291537226213413	0.216662222568419	0.15567456190792	0.212285693813298	0.305604042994319	-0.179436704806193	0.228167476863804	0.239548021751145	-0.210734614769493	0.148955959831706	0.328432347593135	-0.157416488089192	-0.170304694836581	-0.133124385364323	-0.134968263744595	0.210145421188692	0.309742608128701	-0.205990815101049	-0.209616230897443	-0.146322794674119	0.285248605978862	0.495243361552165	0.20941606235421	0.127610870514653	0.335477507528945	0.193866479850587	0.172675272486847	0.315582468662683	0.139882803985517	-0.156089720440317
KEGG_ECM_RECEPTOR_INTERACTION	-0.276790018125268	-0.306733590243373	-0.15373578523806	-0.334916300055621	-0.384905656030908	-0.402333977283802	-0.255742586853985	-0.14492990990542	0.224022026269336	0.155881990716125	-0.238357070203568	0.403548711990029	0.195222036084788	-0.238369391015282	0.561112823845862	0.458970229853815	0.596496000890048	0.49612323333273	0.394953013602622	-0.428432489945697	0.241864230667458	0.289022255537069	0.206119954599676	0.406056979713122	-0.262379775307977	-0.317717268176329	-0.162776143174635	-0.357524573454879	-0.297777683975786	0.542957348939658	-0.278243826634188	0.263135519211558	0.180720248148296	-0.20454903546279	0.216523558617918	0.323172009143677	-0.382645674022753	-0.346573200288635	-0.308559724547502	0.404099805268328	0.647542965651317	0.328635723850279	0.2339111647745	0.55067126985943	0.350273132532541	-0.222759994743614	0.506516541089311	0.181279139309305	-0.226671944040427
KEGG_CELL_ADHESION_MOLECULES_CAMS	-0.407705314472434	-0.389260701561849	-0.415463284076126	-0.408586358035858	-0.41330658840549	-0.407063983966739	-0.385285810502148	0.323519100306869	-0.241214574798132	0.306444879521483	-0.320470956096087	0.355695838848176	0.31087423908524	0.305127437728966	0.343802226499313	0.168208232811222	0.293514454446225	0.275122995259563	-0.207712478154755	-0.287644821786071	0.294272304216666	0.237233415313294	0.271988113516955	0.225123148879832	0.229355184170655	0.380782211363673	0.182470080529662	-0.474387265634122	0.395507560363119	0.495853945997509	-0.313075071117483	-0.189259564027571	-0.198636799373488	-0.249685554118993	0.372046877334355	0.251959840330196	-0.411958861509452	-0.475682201900217	-0.15567026520691	0.32485661925025	0.524148702856699	0.182656331601357	0.116375006385708	0.32459604856016	0.243667640034461	-0.180902305573395	0.419833771647657	0.15124359262384	-0.3348723581654
KEGG_ADHERENS_JUNCTION	-0.298459409303601	-0.248544943680321	-0.198842399824923	-0.311924498275052	-0.27831225833723	-0.322806717656573	0.260070646797822	0.244705039307252	0.271307630249812	-0.278732817378666	-0.228763140423547	0.164087853337087	-0.179435770946727	-0.196406837941092	-0.272073959605876	0.231801010811988	0.202405229094404	0.164597630612161	0.16628630040556	0.19029685796258	0.16066226505631	0.226437398874677	0.156587607726619	-0.197906749000016	-0.219698736265705	0.275887234206333	0.297418627815846	0.215433235257144	0.204843179708619	-0.185279743266138	0.165874410509677	-0.249018063662308	-0.183633927152728	0.24132591717995	0.233234155489258	0.190734214997115	0.166965480534454	0.321234903637293	0.309228163033273	0.25809437094084	0.330412165903474	0.242452306641447	-0.18409168325714	0.177612262958972	0.120250502658706	0.433606970945741	0.16701808182813	0.226087727165027	-0.208459020894171
KEGG_TIGHT_JUNCTION	-0.201139765333501	-0.215633178785142	0.143796631859696	-0.212572528230201	-0.202569783549316	-0.260627500711191	0.173410299616968	-0.126100659228125	-0.171214794352965	-0.324532159038722	-0.186664552053505	0.212687393781142	-0.190609060900327	-0.37400784156432	0.189353560675429	0.185537103854581	0.210689425749025	0.229344206893321	0.189387719891696	-0.163204401136349	0.247589782104321	0.19410522316129	0.138371094692197	-0.277455599362044	-0.368188649710069	-0.276763418966546	0.233945158428585	-0.155824104321506	-0.278079594509619	-0.249834444441533	-0.151505967205779	-0.181557739301873	0.167967709068604	0.173509042593841	-0.180876115291838	0.228229263881574	0.194002716785865	0.164552498318225	-0.20922190985649	0.338746600836671	0.405185525071054	0.25054444151489	0.168324557423795	0.306550176362951	0.153139743881384	0.285954180193932	0.253046893046775	0.150718264351646	0.145199426231282
KEGG_GAP_JUNCTION	-0.203374470209281	0.155764284731094	0.185961723009161	-0.190862656003388	-0.17651797906208	-0.205588508428209	0.207042010994033	-0.25142787296306	0.211251091012293	0.193221065394285	-0.1772931423067	-0.184573243980293	-0.27627737528942	-0.195305841035487	0.221848578279892	0.171443256857222	0.27726007901324	0.21496701290634	0.164313623908398	-0.281214145643762	-0.23179767994038	0.134097322061685	0.28797317577002	0.239224939108336	-0.181485411376483	0.200297621953996	-0.135547693229981	-0.194615378811432	-0.199313139985962	0.199103482184797	-0.270686301176503	-0.182190820915623	0.18798691619816	0.20778281222334	0.164490983561438	-0.201996231408991	0.139796289829623	-0.243286314898538	0.167452157152788	0.230395682488163	0.256337398596804	-0.159791186929943	-0.185356182643325	0.188421811613491	-0.163489317852207	-0.169031258123071	0.261281402762749	0.229465052282875	0.281891314884228
KEGG_COMPLEMENT_AND_COAGULATION_CASCADES	-0.351027702249307	-0.436845142391782	-0.421685572488272	-0.444892249030483	-0.512442578734253	-0.522228003612605	-0.486572038090117	-0.38112734108165	-0.319493159728839	0.451066286906174	0.311403260544482	0.414537998876723	0.756513449191122	-0.142410088860962	0.567776794568616	0.592062981641479	0.599991578770652	0.617688859713416	0.508651482227525	-0.493652235130694	-0.215872699194144	0.750117918530005	0.500032758866408	0.211086122304286	0.235028320498967	0.332735050704845	-0.366627076902203	-0.409847314202476	-0.268633747347553	0.596237743944	-0.364045223626297	0.343706309528965	0.207832975430244	0.333685398483109	0.189943824618524	-0.357292327886438	-0.509740227203973	-0.516276221744634	-0.424293330539027	0.477006796033974	0.584443293581258	0.719332328401691	0.492737830630599	0.618531642378921	0.395876193932424	-0.208934631927198	0.513028068842121	0.228600521860929	-0.337940770911525
KEGG_ANTIGEN_PROCESSING_AND_PRESENTATION	-0.449421910643594	-0.387055980984416	-0.540529680777517	-0.448365595185545	-0.470440554367015	-0.491993353834248	-0.249103288384986	0.385573747756603	-0.283198404623706	0.304019058686854	-0.394335608078664	0.217825511378956	0.29352755468143	0.492511790152656	-0.299475308860189	-0.40929703813531	-0.375394988886828	-0.396831035848122	-0.502308562080037	0.255969672194092	0.323919637939997	-0.280223955899061	0.36757851995767	0.387926640308896	0.468633418093454	0.617356918021802	-0.12266510281808	-0.314545587024523	0.473619245664754	0.443989885049845	0.217712544788928	-0.409930420536925	-0.491935625912308	-0.34655835992681	0.561418440544675	0.262393499272734	-0.401066128685362	-0.456241530855186	0.330182109298907	0.1859445055573	0.282754991740635	-0.261640891170431	-0.225059148430786	0.306504131926797	-0.204453994820439	0.350519185860819	0.144694688178041	0.295391147934468	-0.421447106999953
KEGG_RENIN_ANGIOTENSIN_SYSTEM	-0.377239641680043	-0.39557699336442	0.243170127497264	-0.341433637867071	-0.317120625633281	-0.415438343583267	-0.441247551971134	-0.225711576843058	-0.417938594482254	0.395243092884042	0.276002796955883	0.419347008911968	0.559787900681063	-0.357210550222252	0.466709682333465	0.280383736344999	0.446578852944167	0.292342484698749	-0.215625709169094	-0.308807390799475	0.218112048736137	0.495452687808292	0.467736154375711	-0.241123465167478	-0.30281026462286	0.220581093814204	0.287685421292585	-0.321688847620104	-0.267387935956317	0.323586359980949	0.284417961916497	0.308106093968032	0.285716815777032	-0.292274168945169	0.317109233480654	-0.452985749153709	-0.412654497999151	-0.463940590196047	-0.343783728724706	0.347023583414468	0.237496445764362	0.285733480812449	0.312395959225424	0.291226180206737	0.338251983864054	-0.292653053880895	0.306069779775112	-0.244895521384643	0.27736154236929
KEGG_TOLL_LIKE_RECEPTOR_SIGNALING_PATHWAY	-0.300557851368925	-0.289389784092625	-0.40256329243169	-0.287974628326744	-0.319487759853995	-0.3320647296191	-0.323783536070679	0.1477926604337	0.327767563281756	0.317773486118978	-0.315924309185306	0.168315070989056	-0.139313592822515	0.420898652629077	-0.16007880822355	0.158310121835213	-0.147950285088628	0.167573450444641	-0.266347745759169	0.300133339320273	0.240898933414615	-0.240011108560085	0.364129290948744	0.274441404894163	0.344009374478588	0.528994976115359	-0.242294938385617	-0.222009938908756	0.39920291516095	0.339346660841137	-0.129587100040479	-0.431744839299552	-0.410508567712401	-0.366190357782456	0.335915617393643	-0.177875987047893	-0.24933015993866	-0.276943268543795	0.183334887155299	0.183029186380547	0.175862716102605	0.162519515387657	-0.14313332003918	0.344665263293456	-0.303465121718968	0.270160853917225	-0.219185726542791	-0.194815961385624	-0.273018054890866
KEGG_NOD_LIKE_RECEPTOR_SIGNALING_PATHWAY	-0.213105954320178	-0.243589428782156	-0.291507300296022	-0.355200214131924	-0.344597211359058	-0.350339856751437	-0.266593703722179	0.134965363114968	0.35976022917147	0.373641041523911	-0.220652963954118	0.184082785970045	-0.1756481185124	0.474711099560752	-0.244934901590462	0.230076300354001	0.163323406498655	0.203868958479907	-0.190322483376445	0.29985120220932	0.189317935621107	-0.301084809848561	0.381653189314897	0.324280488479445	0.43490278414193	0.553076536434951	0.135038285337966	-0.256134204227926	0.364974948677873	0.281876790479622	-0.209472348264109	-0.373803557000517	-0.304462069965783	-0.225542381442104	0.193344640730018	0.150361200345513	-0.337769616746075	-0.270398923842108	-0.215937892970229	0.259248140782894	0.338111367522039	0.285495899067271	0.223638230656865	0.445874738972268	-0.248297983841592	0.292486897062999	-0.265192492550113	-0.252737817117193	-0.310744722245944
KEGG_RIG_I_LIKE_RECEPTOR_SIGNALING_PATHWAY	-0.207179896485503	-0.277205889076326	-0.275392034260255	0.239970709114508	-0.176305958161495	-0.184920767977833	0.189590852859598	0.213402160409214	0.310910629079403	0.348435645978867	-0.256430059524291	-0.231048314630157	-0.207246677005492	0.37943519222072	-0.326664732212753	-0.277995978443127	-0.292238683802786	-0.282500728909773	-0.372831222717664	0.283029153636187	-0.128659432931126	-0.320998435105383	0.27820215037297	0.183754934761893	0.282806883336011	0.444038119360804	-0.2961943819254	0.193360294492354	0.443273223396405	0.200871141528468	0.321453009871616	-0.45017086380773	-0.390000629536222	-0.331154020589846	-0.18933135352254	0.203032012047407	0.159344989400848	-0.220141132964701	0.213851157556708	-0.189533896742175	-0.12788306257366	-0.235459353161585	-0.199416482710076	0.332838863862878	-0.373315071757405	0.319254307228968	-0.292746089147993	-0.326313923275682	-0.305006843395469
KEGG_CYTOSOLIC_DNA_SENSING_PATHWAY	-0.353369703446765	-0.399174524247203	-0.498283169174324	-0.357037678829541	-0.328849148685871	-0.440057483539328	0.196402179570991	0.245453842489249	0.305879126200916	0.28416030262192	-0.280137350375194	-0.2107261324147	-0.208953198794095	0.3283945717973	-0.220183844196012	0.210272723784533	-0.270820474422979	-0.183756000443707	-0.291130199389732	0.252624145954388	0.33726336392119	-0.343221761396875	0.319288167793148	-0.242020734881895	0.335509503739277	0.356715924910013	-0.245043808729679	-0.267528920354713	0.483426133056905	0.270282288550531	0.312106634252925	-0.227873472668617	-0.535580871790789	-0.283432052255766	0.324651556284846	-0.18372895600313	-0.27574506830887	-0.343219953650573	0.252428527918032	-0.257962809354019	-0.261097798881242	-0.246446991920818	-0.210056785499568	0.40071964538351	-0.259871973134243	0.423829086179068	-0.24096625211374	-0.173667895671525	-0.311248471467659
KEGG_JAK_STAT_SIGNALING_PATHWAY	-0.394630089359047	-0.357830088081833	-0.401135674812162	-0.319377017591345	-0.346291561885626	-0.348363754871556	-0.422753560219529	-0.169981842209541	-0.257271874994374	0.438414413512132	-0.273059329268131	0.354461105462746	-0.226511514826242	0.365016713479101	0.332260721219397	0.319509015820344	0.411809956182526	0.3933899751445	0.174177508220057	-0.24362933410908	-0.194514419187189	0.184115393046807	0.458518113304299	0.21783030833771	0.246080803434849	0.383569036398694	-0.303297236044007	-0.415936487891421	0.266254918245119	0.498365221397543	-0.271526521590299	-0.209896941670189	-0.314598363803921	-0.482198462182492	0.172858283378272	-0.237934102007345	-0.372802735189093	-0.365448970134447	-0.27456826992885	0.30857516481441	0.397877252044847	0.217809088385411	0.26999644185599	0.38487884553387	-0.210460106041074	-0.20795428296647	0.362450596935217	-0.261224712818711	-0.355394727978255
KEGG_HEMATOPOIETIC_CELL_LINEAGE	-0.548050580583342	-0.557069528164391	-0.530050250425728	-0.48060345140087	-0.516984250331494	-0.516020176454429	-0.484731551155056	-0.237211292079415	-0.354237334957256	0.553282423727188	-0.174844268772548	0.423528642981268	0.245465933666498	0.609053050152372	0.494661885289887	0.248580760470992	0.411994486437263	0.398550919576757	0.151568910167374	-0.155316688396011	0.176056251370292	0.197237375802586	0.551337945569841	0.214405330631891	0.46166384607459	0.613838303090912	-0.30814684407412	-0.487666504268605	0.481761165025593	0.569227443667661	-0.350677000615629	-0.160517133077459	-0.225149239090146	-0.521784596400706	0.324721615460048	-0.189059923753161	-0.51667045739569	-0.485681189300335	-0.181325742247617	0.313641746054702	0.530421898871779	0.3106758241795	0.236218241259873	0.427004439848725	-0.165004169193242	-0.147443857114571	0.44484475187446	-0.214727471264795	-0.448853987412505
KEGG_NATURAL_KILLER_CELL_MEDIATED_CYTOTOXICITY	-0.253134233303035	-0.28911167355481	-0.371475520952679	-0.306955594345904	-0.317309810503544	-0.357167615368155	-0.382232252978556	-0.192865356439372	-0.210734537171648	0.445579130613557	-0.159755102336588	0.215346836919892	-0.150603953275638	0.518677781303012	0.144162459829586	0.166428652404355	-0.146331382534177	0.162646117470863	-0.198766141264672	0.284460264383449	-0.206092409203718	-0.155847649178325	0.53383141280367	0.238222756157964	0.451589659607242	0.572912530717068	-0.302454868481185	-0.324421877513727	0.431166473058749	0.397775288865002	-0.265693239201461	-0.224886413730958	-0.314008948364116	-0.290958614832585	0.380323740205452	-0.203341883746339	-0.301181534001102	-0.454936238324138	-0.262709440581577	0.242329700462842	0.270111647524901	0.102622863749156	-0.172631206208405	0.299727594485612	-0.263968041428319	0.286264738184156	0.146614476775588	-0.181778349579306	-0.359663503288666
KEGG_T_CELL_RECEPTOR_SIGNALING_PATHWAY	-0.227722501222055	-0.225639571147249	-0.286636177684215	-0.2546545180928	-0.217818462411907	-0.20173017061518	-0.231349696251744	-0.116383923970464	-0.193298307665481	0.346725291338618	-0.173188850797972	0.211480721825413	-0.283573118967214	0.500984385628638	-0.270362611858573	-0.186988190491348	-0.230014317139446	-0.162863845255231	-0.242455845403411	0.231295047270184	-0.115017669791572	-0.311595982250091	0.395020315609173	0.19036772946355	0.394043097836219	0.538618915216084	-0.156634032634047	-0.24706669023582	0.51204489344552	0.289737712815263	-0.235969002425258	-0.314446309292635	-0.277185070631501	-0.258283020134221	0.283434369272397	-0.139054017754476	-0.212672695315511	-0.2189642517317	0.263938915109597	0.218765309284118	0.314633486355877	0.144958480001514	-0.149599833941143	0.234164060204063	-0.233362276086944	0.369899252484151	0.192825108833637	-0.224100762510487	-0.2496598461644
KEGG_B_CELL_RECEPTOR_SIGNALING_PATHWAY	-0.305281611691672	-0.318967933576742	-0.286184750355182	-0.31388545346317	-0.301446311498906	-0.303587014159702	-0.285664834805675	-0.204364827030343	0.233554012340163	0.436427711035238	-0.210871845217419	0.152655211338844	-0.236432138636305	0.551608945587718	-0.273320755493033	-0.186394926404811	-0.274737611072894	-0.144371648930262	-0.187877376123504	0.289774715386047	0.180251144187554	-0.262130914118901	0.358420911999604	0.158343908023382	0.428274877555222	0.588514661769559	-0.182792576514433	-0.212950351727478	0.540354063471709	0.236210893272116	-0.272403443228241	-0.346033096094663	-0.445687934034273	-0.298860678176455	0.364891384227217	-0.241667488506765	-0.263582028775232	-0.251224729133119	0.266808442462736	0.239946190541193	0.354842936730375	0.162210847656281	0.113272495683832	0.252212245948536	-0.338760703006799	0.387853092581446	-0.157760419296365	-0.244823023042465	-0.322029429310481
KEGG_FC_EPSILON_RI_SIGNALING_PATHWAY	-0.260990565387932	-0.295910539473725	-0.300109634912746	-0.240926169401501	-0.242782899041925	-0.216633723701665	-0.247502349841683	-0.211011400419491	-0.214890028777606	0.338128022369633	-0.155282420526122	0.196358428746776	-0.233161170318024	0.43280023078346	0.147424204346555	0.141740399522782	-0.150138757204719	0.163202474872847	-0.145637991627496	0.198118754374525	-0.200689047960922	-0.215463821861526	0.392412783133721	0.171538263128137	0.316569978452451	0.453884768806089	-0.239794668996477	-0.258814426956017	0.264886327033911	0.252543511763365	-0.235433839266135	-0.181372009120874	-0.188657828272421	-0.230266104763485	0.261474653806421	-0.192793515298113	-0.267078976969685	-0.198546020578709	-0.103839028434297	0.238343331787857	0.206976915533172	0.156575536392805	0.172351131424203	0.191546602913321	-0.251827537772356	0.176212727009161	0.216493479006228	-0.229648559122445	-0.19162306944922
KEGG_FC_GAMMA_R_MEDIATED_PHAGOCYTOSIS	-0.17488237108701	-0.170582846614604	-0.18874386679561	-0.231953894805228	-0.241554767865243	-0.238609202813193	-0.158077458888023	-0.172312847130487	0.280972158799937	0.298104825399978	-0.21249724879674	-0.178640321682814	-0.270909133524381	0.409677178840624	-0.191406715309897	-0.182561018616061	-0.186311900783553	-0.134442052005282	-0.212692437370406	0.33496954995345	0.18243883561791	-0.324334289039028	0.338509491023486	0.300653858570937	0.366391423887393	0.451125168590067	-0.228615973938731	-0.223415698559446	0.312671184162384	0.14923519494704	-0.207171984418142	-0.242353603781468	-0.284371001922108	-0.18852881865575	0.295375775574695	-0.148219385128488	0.230284609128586	-0.222379033621681	0.166861216913718	0.137907384346352	0.215695050224197	-0.172512104199501	-0.205772684165926	-0.117427104164235	-0.238317994275194	0.266782042665533	-0.220618452704734	-0.192080005938522	-0.20627110198153
KEGG_LEUKOCYTE_TRANSENDOTHELIAL_MIGRATION	-0.296949908387989	-0.288138445390651	-0.223321129997222	-0.322426183211537	-0.309958782286551	-0.330627765921307	-0.194372402670245	-0.19343729239669	0.167389363804107	0.322220649132411	-0.2556548616056	0.213064099289154	0.17696798230139	0.34109744142843	0.192356856368099	0.203846458773028	0.257699731894691	0.228061223397407	0.148201330353947	-0.195956915891711	0.205255707901837	0.187968257888626	0.361554718772093	0.17733745664547	0.342779796938555	0.377685498648483	-0.156452634519825	-0.351480263010564	0.259665868472637	0.296164128627225	-0.262663844559688	-0.195167060599614	-0.19678581602843	-0.179042609363321	0.238788817080182	0.20752938509596	-0.230674774104209	-0.323698432727602	-0.174165386680632	0.231900632931169	0.443299254148885	0.205033672351798	0.113527773610518	0.277491602115085	-0.221022911142031	0.303815556274643	0.22193616306734	0.14356118656086	-0.193137100966632
KEGG_INTESTINAL_IMMUNE_NETWORK_FOR_IGA_PRODUCTION	-0.51781104303876	-0.490893734815739	-0.557828933271437	-0.524032590807057	-0.497742454251954	-0.51375794390037	-0.470442512501632	0.328627819392056	-0.340046935212269	0.624954311095636	-0.400948469127212	0.494738846564268	0.32429360445656	0.534074368142882	0.242163159074825	-0.312614335924481	0.267414072373358	0.188395603626167	-0.417484412162693	-0.315952568641206	0.390791252484432	-0.263382916073795	0.51892997606133	0.344352975995442	0.447197204653707	0.613731158996133	0.201851146138497	-0.541711664976175	0.685572547642443	0.646475622504859	-0.340962355965968	-0.313539636861793	-0.334920227536736	-0.481689626331755	0.581185030143979	0.302412368725668	-0.533690463764865	-0.568234956561767	0.286235427161427	0.440943327355609	0.568475618073481	-0.191726146965609	-0.165611495817505	0.34821392891856	-0.16618783667801	-0.224274982322959	0.499574984969377	-0.222985207924527	-0.394423328040323
KEGG_CIRCADIAN_RHYTHM_MAMMAL	0.604644173059699	0.54454869933297	0.627717354204979	0.702701534097616	0.673462473099418	0.613063962324992	0.179843137709866	0.381285958477107	0.525242372350668	-0.584985973385459	-0.552589505701421	-0.227132117180052	0.206502548541804	-0.574010130205921	0.266175479972922	0.471977810254695	0.324074116152478	0.445339560532083	0.415864378718942	-0.372856824539739	-0.168756245913729	-0.358869259694092	-0.547066567539215	0.345924677353432	-0.572730147378026	-0.441622719801136	0.382426936467155	0.395005093899253	-0.56259741589698	-0.315681084258983	-0.29221670086493	-0.433085030203967	-0.403760864474931	-0.331691650764116	-0.370954604101703	-0.324022513179577	-0.471154562831606	-0.277184464629399	0.414562824926141	0.545232467115625	0.564507350533207	0.279389753475483	-0.267967232677268	0.312203380443654	-0.470115463692601	-0.311397501964518	-0.259267451853726	0.428736199027677	0.244594133267262
KEGG_LONG_TERM_POTENTIATION	-0.247197782240761	-0.231397381372823	0.186137351617734	0.207240969675594	0.199835869170474	0.177599882670289	0.247326433083648	-0.186717336148486	0.20049933113857	0.263667675330419	-0.188153348824131	0.177697468600073	-0.313848919250137	0.197966299848932	-0.212506284298063	-0.206542601161299	-0.217646872940144	-0.172993246764039	-0.29840259489365	-0.265757949700342	-0.189942069187061	-0.262352549953443	0.330343109433301	-0.184696345830028	-0.227473672056269	0.308053644672413	0.154866089551666	-0.151488986838919	0.213427354381614	-0.20097260269702	-0.211033385977896	-0.246458034096593	0.229121742688441	0.266830097678898	0.17560106419185	-0.265827346624564	0.234794796173497	-0.221900862295534	-0.14236787958068	-0.202788466175984	0.187118732803471	-0.21543741461194	-0.242716911969427	-0.21520615877511	-0.185263735530459	0.205690378751129	0.24224460272262	-0.271659120998052	0.209636685620158
KEGG_NEUROTROPHIN_SIGNALING_PATHWAY	0.120294291093209	0.177637277082637	0.160112102484445	0.190936199247872	0.181375399583946	0.199244543199791	0.184860044708068	0.153132988057469	0.233877121065031	0.140116314763013	-0.229512508447098	-0.251620331864991	-0.270119840820973	0.312082622664446	-0.235891831362119	-0.193797786277822	-0.209175293566469	-0.143068265513028	-0.215547238990969	0.21458100574199	0.17659465075672	-0.285190830980105	0.152132666281411	0.201955973631782	0.255966178677143	0.357207152147004	0.183117291159203	0.170290793007443	0.307381921177329	-0.274929313651813	0.202634884159662	-0.299077550821953	-0.236474330142505	0.218567069450911	0.2428817581545	-0.144425292975723	0.305859715922237	0.168596380857616	0.184616940446749	-0.149444306750131	0.217497105484751	-0.229068766868943	-0.290779670571466	-0.244029452590971	-0.290854005002946	0.251426660997864	-0.311426443431991	-0.147562945429062	0.16776126522337
KEGG_LONG_TERM_DEPRESSION	-0.215613405408447	-0.224140493724882	-0.239635068941868	-0.22533265065125	0.190903232894129	-0.175803131169395	-0.184248034948192	-0.240180810250584	-0.216355211574132	0.180892218593047	-0.185530475027353	0.190805201345232	-0.272293053298085	-0.212861048746478	0.289120666066973	0.239229503687469	0.218981265625969	0.266316130146153	0.208050183701218	-0.266816423376395	-0.21539722121318	-0.155472766252849	0.294067671744612	-0.229298271337486	-0.213405051417537	0.188891538878641	-0.223353303976245	0.240363527596273	-0.239910631199305	-0.207344256086727	-0.253481146313607	0.212457381029564	0.309875337970413	0.205158713475219	-0.199188923440248	-0.305302246630965	-0.218985024439524	-0.245174190372319	0.161396907398635	0.263958926015325	0.178955325996952	0.189395251796458	-0.183214226847997	0.198099149025204	0.15502147135353	0.205542240987972	0.23319696544305	-0.181692001824316	0.226566591189774
KEGG_OLFACTORY_TRANSDUCTION	-0.503034139343353	-0.543489949788048	-0.560090028218375	-0.520312726219476	-0.533874132108633	-0.464638268275442	-0.579080892293883	-0.576852978401208	-0.542646704254516	0.564950760197203	-0.212556723043248	0.616651872855401	-0.448106558838186	-0.472737500108848	0.77193681161018	0.344133627266591	0.662762570393537	0.552367444885913	-0.215720570370644	-0.518490105820625	-0.67709937008088	-0.215058288743635	0.661304583464521	-0.551904428629582	-0.465369537070946	-0.388180345833912	-0.628991371471509	-0.5319650700498	-0.619933219033457	0.727931150978311	-0.519780667004092	0.51395589091019	0.521059469301281	-0.640147811188453	-0.566913101515881	-0.637113628092025	-0.591807663282805	-0.534951778537955	-0.598007539655406	0.389658812055449	0.387594601215076	0.276809515689813	0.385941107646246	0.422527376051608	0.393026923353849	-0.507909602635647	0.738930846248393	-0.442334860969337	-0.490301807178142
KEGG_TASTE_TRANSDUCTION	-0.33901505707595	-0.267894110964078	-0.305307823986509	-0.289427802036934	-0.359275735670861	-0.246242605184299	-0.466616060776336	-0.545465149020189	-0.315644637767134	0.391061963885792	0.25328360979214	0.393230129362852	-0.449983894280945	-0.462125197815242	0.483163189287378	0.335197121437447	0.548941476984924	0.457758684780011	0.393096680575002	-0.481036617393366	-0.573758423291929	0.205143569139456	0.409787447839851	-0.5466202781032	-0.402542335053134	-0.328316233115452	-0.621473284340575	-0.49106593904951	-0.441546487322594	0.500830922220867	-0.477836642495806	0.516354924275791	0.480414934091257	-0.299233467724893	-0.514351926609791	-0.564694383322026	-0.460034242497531	-0.425831088672623	-0.511488299194535	0.469172728243602	0.353912140422126	0.331864170673565	0.375107826368702	0.387441391627967	0.446108996822212	-0.481124954142896	0.430856074129788	-0.255580390934253	-0.248411726852162
KEGG_REGULATION_OF_ACTIN_CYTOSKELETON	-0.191688066230585	-0.155749146211631	-0.120754561121883	-0.229724631779813	-0.181499870736439	-0.240834208459336	-0.156043572602323	-0.175299688497874	0.188726478481526	0.209259329467784	-0.137418125848163	0.164140892518148	-0.209196886792562	0.215842371131994	0.115376144082102	0.168297801098213	0.189040867127054	0.157948373078862	0.124178572638247	-0.162282339703151	0.199347277555607	0.163695257542726	0.29213943597798	0.209412673832347	0.163874500123218	0.287684617946637	0.156519408145827	-0.237970526325816	0.151775137149406	0.227022344264218	-0.200455018604195	-0.194323155357796	-0.196171772666464	-0.14860426823238	0.16515614660204	0.227429917962469	0.209448568595712	-0.195323431305511	-0.149588929365809	0.20096225951681	0.331969755174811	0.148555206155929	-0.200789365528399	0.181977007431699	0.149657490868322	0.261065034600669	0.231400559805456	-0.136635511203408	-0.196801074141149
KEGG_INSULIN_SIGNALING_PATHWAY	-0.181108170169665	-0.138961533267802	0.148382034755802	-0.176994815057784	0.155053842501832	0.162184865450171	0.240053564947039	0.130785873910292	-0.169590087526858	-0.158283371115472	-0.189880949585742	-0.235408322245629	-0.214547543614703	0.200648412975675	-0.249491125325429	0.205287616787978	-0.163275895105133	0.180337865474548	0.17369377993026	0.143292148393221	0.182375716777152	-0.239720463199097	-0.139800644446568	0.129814047884259	0.163332541407623	0.221697565862436	0.202948316399897	0.191640601101317	-0.145129733614693	-0.320657168024579	0.156186244876161	-0.261866761195961	-0.281596015734576	-0.182607626829437	0.200534544887418	-0.179468857201267	0.254263376267905	0.208514088214443	0.189347023062209	0.14188699796402	-0.142344475881042	0.17874038970041	-0.173904500076121	-0.209848081329064	-0.162044104016818	0.190327063301103	-0.28725450879874	-0.19790730106464	0.201710782746102
KEGG_GNRH_SIGNALING_PATHWAY	-0.174910596529426	0.187978165250398	0.204734049058549	0.228608284550321	0.230422948265906	0.233129740747217	0.189570194660717	0.186919823421611	-0.189647103532554	-0.209736249810743	-0.216739532475036	0.273368115396302	-0.245738895171927	-0.175428340517214	0.157515235871143	0.143654491357757	0.17324040477787	0.184911319045932	-0.180577177729946	-0.223390860648159	-0.206998015895825	-0.211719989682682	-0.205774103812985	0.16707845385174	-0.210552375849607	0.220490332574186	0.212873022958952	-0.132175726019098	-0.176232682632759	-0.193069288884884	-0.174928886268569	-0.20549876853651	-0.199199875554592	0.212023244200576	-0.163661988117614	0.177495164258688	-0.19416439598003	0.160959310818314	-0.125308281238475	0.161854890744925	0.187786205097184	-0.257647613121983	-0.212492326037363	-0.222789458952999	-0.201819670625178	-0.152869102045632	0.249756195860094	0.180775611738635	0.206397199098275
KEGG_PROGESTERONE_MEDIATED_OOCYTE_MATURATION	0.242207268385999	0.295450121998173	0.299082037655033	0.215210599058009	0.277699522148195	0.315813870109573	0.249845290126906	-0.232192087272879	0.152037076105485	-0.186665473287846	-0.189679303529118	-0.332366787449725	-0.225779023168533	0.222104355170004	-0.239593358858687	-0.185218952581141	-0.250640043991854	-0.205327287213857	-0.151260257518014	0.179935078583775	0.118078098326723	-0.243474066061292	-0.216779090952994	0.139135606429477	0.279296989189192	-0.201096901508923	-0.286300843600994	-0.22954311342768	0.193255883905576	-0.286956290121763	0.181617362505528	-0.203433697722081	0.251510209122744	0.244576775815488	0.228785066851694	-0.306250799934487	0.242456652970307	0.264399202637408	-0.158000961428581	-0.275334870312565	-0.210180876288875	-0.1640074439512	-0.250308299902217	-0.277079379419355	-0.201412922142734	-0.221290266317888	-0.265428664881787	-0.175224019861647	0.22201884745753
KEGG_MELANOGENESIS	-0.25448377077864	-0.224622453883864	-0.222411892868531	-0.178119160391027	-0.213889183980455	-0.189228294751566	0.18008713093041	0.293606130089642	-0.244696954619413	-0.224550013276948	-0.286408070908339	0.262194419304931	-0.26835531939904	-0.289618548487569	0.188493505754085	0.14766522379566	0.224224001324239	0.183049645568284	-0.15231698759189	-0.230687142180552	-0.188820919560083	-0.26563692346956	-0.177391849627145	0.234486298989243	-0.262798608987799	-0.189706382276839	0.20551155409709	-0.224050090484127	-0.223751721050614	0.175151604950008	-0.223840913299734	-0.17703660381673	0.196622229876576	0.225834055010827	-0.184315733279146	0.21956505495772	0.169804917410442	-0.165318518443578	-0.156623286899807	0.223721927158511	0.263642330868799	-0.14426549194301	-0.204883652618565	-0.18320239515192	0.250877425956539	-0.160171058132251	0.319051279992676	0.174604186293881	0.200653081834369
KEGG_ADIPOCYTOKINE_SIGNALING_PATHWAY	-0.237186804002674	-0.246050947353432	-0.259246025078847	-0.182197372058538	-0.227470881736499	-0.214622038526392	-0.265419265054337	0.11467043695535	0.213209123714459	0.289699178804263	0.1645028077226	-0.170484104481242	0.364407916218076	0.341369722856006	0.162331014351393	0.231081495818015	0.199497985822306	0.255892978674555	0.211977065844932	-0.12518542235957	-0.146270167292825	0.320475525544695	0.232817780282353	-0.131087432593502	0.309842322893579	0.353098968837955	0.124891085419231	-0.164532654642819	0.14962693352029	-0.161645169721298	-0.158739493472009	-0.171999199954361	-0.315607587384251	0.168418489941772	0.146872480057488	-0.228619426490876	-0.217731681496289	0.180063990335054	-0.202572759731924	0.238871303872655	0.350985696616956	0.3055194532368	0.252814576161838	0.318272488215478	-0.188475278997569	0.25603567015545	-0.197886912054786	-0.160350131570167	-0.176679805800285
KEGG_TYPE_II_DIABETES_MELLITUS	-0.262708800043633	-0.229655257421577	-0.267267819900819	-0.207665233852593	-0.186210296660947	0.241442769289164	-0.278061320402367	-0.320339414734337	-0.271421304848353	0.252454566374123	-0.184378103089461	0.182791521750296	-0.324839307701297	0.249026672349908	0.362057620275244	0.313759597546704	0.284560420832512	0.370419695374163	0.289357144565032	0.191205989509597	-0.337791447515778	-0.178016119532041	0.222929480663514	-0.225388429909535	0.315683419791537	0.245385902543267	-0.351667566778755	-0.241193648154394	-0.343678585116957	-0.194359154260034	-0.324721625327368	0.205141657869331	0.201045135995251	0.250031288760281	-0.185052396171109	-0.430051177144333	-0.276011703265565	-0.278568332955331	-0.258455087529105	0.273054524307348	0.28000546386455	0.311262085974284	0.269323658582093	0.334784998420007	0.208702393930884	-0.277166595317897	0.218767522927281	0.259990752189881	-0.236087707201574
KEGG_TYPE_I_DIABETES_MELLITUS	-0.579459219817876	-0.52750692655827	-0.616992922440716	-0.570374537073883	-0.567110112380943	-0.550539797118181	-0.419641727217015	0.428213903994757	-0.259077396068497	0.534888460673384	-0.299151687310318	0.354865825301872	0.284982118271401	0.508410982491385	0.283042264533317	-0.391074206234611	0.176854825089763	-0.143304108153659	-0.435183582205942	-0.212964878356629	0.316572490182868	0.148251125934785	0.554619487437273	0.44843499399024	0.487130876342861	0.610367632285944	-0.295452732341912	-0.545856109149491	0.552590033682409	0.635775239700559	-0.270200843409539	-0.275527483967102	-0.276102920497634	-0.423190274378326	0.546791193590583	0.187907901003611	-0.552425215025958	-0.592378765608766	0.259753931633077	0.336405257752158	0.478187611707068	0.176025311940631	0.192769133455565	0.513023232892976	0.260646920142189	-0.189987600775066	0.387621554672425	0.181035793806804	-0.520595049428406
KEGG_MATURITY_ONSET_DIABETES_OF_THE_YOUNG	0.198878913767291	0.15427400412001	-0.367246279257954	-0.321413874068713	0.240730855792585	-0.191703676880176	-0.365713709354442	-0.711888824895997	0.27215511940896	0.109548815154274	0.40879958299702	0.356902560722635	0.647088492691607	-0.47418206720386	0.66924193346981	0.267867329535046	0.471376094447438	0.453558926472022	0.245868147241679	-0.339030301080471	-0.654592996119666	0.646095235812909	0.436255638502796	-0.533939637962546	-0.390371507242351	-0.242193974831325	-0.652605363382498	-0.398662562442342	-0.520529544684067	0.325562822215256	-0.559232245992859	0.581537919445907	0.425408726311711	0.395096868597306	-0.393581414806157	-0.70499456346559	-0.495300123170626	-0.517835543717738	-0.498466362866854	0.22459612334783	-0.31065558164624	0.553848893030807	0.29366894462771	0.454451260114135	0.273415633777977	-0.201726073290046	0.414312972719078	-0.235778235108539	-0.358268378492279
KEGG_ALDOSTERONE_REGULATED_SODIUM_REABSORPTION	-0.320701180602927	-0.29620344204067	-0.315681332241987	-0.253665953914611	-0.255541842789343	-0.264326684816965	-0.298150760541201	-0.176752017154457	-0.216021283659663	0.218405083606655	0.192180857438352	0.318113828550951	-0.208694344440148	-0.203402708024681	0.360885123954845	0.348993660077489	0.352144115080846	0.414100957685239	0.275109798853936	-0.318837342364275	-0.219481104798233	0.322398494985867	0.29400482104095	-0.327817266692088	-0.219922592844223	0.254332497391056	-0.186205044183998	-0.267217044945112	-0.183427847096839	0.214188819478163	-0.230449570204271	0.197318093739619	0.167197801920617	-0.316951708132228	0.201817668384113	-0.391228818139571	-0.289582319153884	-0.262237248298463	0.255423864840465	0.347238798723983	0.343339404784998	0.41970573980615	0.306885574955507	0.371348383502483	0.179896142189901	0.231985893630567	0.320852434737122	-0.248600799840409	-0.366950125184688
KEGG_VASOPRESSIN_REGULATED_WATER_REABSORPTION	-0.307992335401619	-0.1122432881376	-0.172689640347697	-0.153430654464786	-0.18294444203804	0.106877337909694	0.384810785325818	-0.158635249743506	0.171468187571669	-0.333774022400605	-0.243675283913233	-0.269732083591543	-0.234296323141886	-0.190500697185497	-0.248523867694154	-0.189299442752599	-0.244874864330272	-0.307845835336146	0.147169804239638	0.211522195452158	0.221349104726499	-0.356211303172254	-0.252024154959628	0.322720288486754	-0.14020877379579	-0.206100701686912	0.249192708991297	0.341341943478568	-0.160035254042547	-0.280163445321036	0.285859081465634	-0.215904884985166	0.26652165539008	0.295074539446703	0.447153232359409	-0.151899948100718	0.259239955061474	0.291370528797176	0.484267225234176	-0.224763685745387	-0.229265091437697	-0.171409224424458	-0.294460753846416	-0.326794916657217	-0.196706680495759	0.498247495602994	-0.234207957959688	0.233219962711086	0.25212147948504
KEGG_PROXIMAL_TUBULE_BICARBONATE_RECLAMATION	-0.239401736899662	0.181754730062458	-0.219614570380297	0.317995964779856	0.252506020727931	0.239560083347311	0.244512490176194	-0.270698901974144	0.202824359051436	0.249830196980439	0.219585644248542	0.237391453187932	0.449047394221093	-0.274312380276591	0.335660953138162	-0.236608939613355	0.373319807081527	0.251279165021535	-0.248672670964614	-0.281158090901887	0.183476526257905	0.495606245955464	0.222312157241324	-0.264273878439035	0.285426707533424	0.147927368922968	0.265821427538819	-0.307143387985843	-0.300832021904219	0.270222297617195	-0.272955449742492	0.25761043000657	0.182488693615596	0.25315451429807	-0.238315437959297	-0.382546861453509	-0.29456992946107	-0.257649833602362	0.186788693436745	-0.134091442736588	0.225566858145396	0.283074941596756	0.211438076056915	0.154101955255383	0.226984422376805	-0.418621810326977	-0.237822809051877	0.240545012979701	-0.345847667718484
KEGG_ALZHEIMERS_DISEASE	-0.144838618296365	0.203435777449256	0.146398168932659	0.148925516831894	0.235607154021616	0.118480296721549	0.426449175058598	-0.129808168185607	0.268173584389658	-0.460350837047917	-0.429083583274834	-0.477551580479574	0.350408210131971	0.111529284350355	-0.452050734159767	-0.391514166307902	-0.462557357499472	-0.446847229903362	-0.363083119920982	0.293166098031882	0.448718989857545	-0.136319451845982	-0.276273111400762	0.305375880418662	0.194641142446815	0.149199881088162	0.172007215218478	0.383209627554501	0.213580486907031	-0.464176901737906	0.337355693070891	-0.400803207449497	-0.368982973142157	0.27437370748124	0.365599876842864	0.276166961070461	0.301836513114674	0.253452352679473	0.33942803507789	-0.441306561400918	-0.466680007440578	-0.277917979712996	-0.2950414538532	-0.398971110015181	-0.285260142686847	0.419756277619706	-0.502068010891498	0.321196720545941	0.324625574956098
KEGG_PARKINSONS_DISEASE	0.176407128652582	0.292116216304992	0.23247735660732	0.240232969283289	0.33256813844942	0.208216306654862	0.46878356895473	-0.170126508277476	0.278096638957851	-0.591609157019651	-0.480435488748068	-0.630623741311692	0.574766087010915	-0.0818372168898825	-0.515447787915228	-0.506576685114313	-0.566847960377752	-0.567161316092065	-0.407743086386423	0.402247963130081	0.493619224243362	-0.118399782625011	-0.361645345835241	0.345847612679002	0.347337039724758	0.136997901492466	0.221918251014884	0.513285608349205	0.32593830609251	-0.596730069731812	0.470972012657902	-0.523871342425129	-0.478787827893298	0.248609196920577	0.440585901980802	0.431525884114042	0.330250970453033	0.377516439413462	0.417990560743081	-0.594046533891298	-0.654199691807111	-0.333763018533543	-0.322100003327563	-0.533269802626724	-0.40423370106557	0.488934362704759	-0.619943473607583	0.342850391322807	0.3630283626387
KEGG_AMYOTROPHIC_LATERAL_SCLEROSIS_ALS	-0.240004544134954	-0.258041928403372	-0.218142554458155	-0.190336610430046	-0.194676272821635	-0.310580647212158	0.152546283857701	-0.23008798451115	0.252661852380994	0.27081064444062	-0.298559611412511	-0.22763518470883	0.230358027080737	0.328082060578165	0.205884269656101	-0.196255876659193	-0.225376694124304	0.181744569448844	-0.234307157470332	-0.216791377148224	0.186829208363341	-0.219754776687797	0.420670224601945	0.167887810847821	0.265905764097448	0.41564022898112	-0.201732222643304	-0.203262938818282	0.188681809492124	-0.169761780415047	-0.265427980046514	-0.203511864144978	0.203247180909199	0.312317206867793	-0.215790375427525	-0.196047825009105	0.178650301343798	-0.256130859563652	-0.236141900293911	-0.240457304035232	-0.145598942897312	-0.168529662016984	0.159774450975977	-0.187133131269241	-0.279180427848699	0.195966016147197	-0.295863393265479	0.175633586351298	0.215417968452661
KEGG_HUNTINGTONS_DISEASE	0.123533646901911	0.218200185562737	0.17299457398964	0.19415596495339	0.224158208588432	0.179478804012568	0.390812813734101	-0.141041927895888	0.223068033748111	-0.472659459476817	-0.417874870867241	-0.49490695428202	0.315856836686261	0.0951980542169485	-0.44839314529448	-0.4106587653138	-0.460258946721886	-0.450262516121384	-0.327750202048942	0.337642789021315	0.385623159782284	-0.241201396030747	-0.298169761542412	0.198435873641112	0.264702848374223	-0.118953156487576	0.154300730009503	0.409409998426747	0.243686689245419	-0.532853533600412	0.367714690938064	-0.42994698983398	-0.368898697967358	0.219976859684582	0.417237083663716	0.316186969597125	0.344802515318248	0.331770908645401	0.355762651224164	-0.42260714258111	-0.493602332446645	-0.259612399463001	-0.250416563896114	-0.387088784906842	-0.348419058151712	0.378257102210573	-0.517613189671809	0.305087277538793	0.35431624510507
KEGG_PRION_DISEASES	-0.372358010294304	-0.30130916209751	-0.334327210695816	-0.37854649137828	-0.366344082043908	-0.320906079669233	-0.149716468539625	-0.290873374259904	0.146633314667254	0.214951518797357	-0.194835540577646	0.168672528624408	0.4423433308865	0.190835378535881	0.309596982194507	0.22140394827563	0.235169654630134	0.291400065166889	-0.182114548441349	-0.179248062706917	0.254066626960509	0.410300861064316	0.31232229936263	0.382691583111736	0.363560612718388	0.404970365401948	-0.320239648163823	-0.143739465437662	0.286814003101017	0.291318926502747	-0.347246188329235	0.197874145224714	-0.261203675393193	-0.241270081729299	0.244173355458482	-0.327322709856317	-0.266211237918051	-0.269187271114027	0.137994697485651	-0.14056742985019	0.334408936898822	0.471721093005931	0.19899174244893	0.288960519884601	0.293198618343194	0.32765003603599	0.18762887891851	0.310191749733749	0.172658262902862
KEGG_VIBRIO_CHOLERAE_INFECTION	-0.138902351412081	0.143293026414229	-0.220499757516238	-0.254953271938455	-0.194160857676544	-0.182779498447143	0.269344528399053	-0.155808070412785	0.30839563347465	-0.344348130898721	-0.251648291084657	-0.418200126926388	0.158266804535325	0.165498663467903	-0.308933114614201	-0.354874375442926	-0.299047530856826	-0.318592695270207	-0.358061710421321	0.0875109115424422	0.31187320838545	-0.31485791238735	-0.154069126760873	0.317713397983399	-0.145284258972744	0.3144126688197	0.167230974858768	0.27240093639521	0.132726891895103	-0.238228390728232	-0.201282848674916	-0.331607558035738	-0.265085723052463	0.398726537026199	0.464735266942182	0.219721960032335	0.286021289385622	0.247142451088051	0.373330030197076	-0.31374668406059	-0.254365348471124	-0.218487088913203	-0.268116911288041	-0.312547854639047	-0.27872948296694	0.470523803698479	-0.278825505407761	0.353267314565183	0.271714967020481
KEGG_EPITHELIAL_CELL_SIGNALING_IN_HELICOBACTER_PYLORI_INFECTION	0.240814531385153	0.255390326910386	0.163998109998295	0.184290717960141	0.174511566565971	0.14749004762683	-0.158549133205458	0.200320733931649	0.382777305042084	-0.349630904554498	-0.264408991632711	-0.347596093938839	-0.217129818565791	0.241396022468034	-0.347792569856999	-0.230214160773865	-0.308141584113472	-0.181232956601249	-0.278564450956154	0.232139635670533	0.267503065115171	-0.368809957413588	-0.179771981689546	0.231791326274769	0.201963307617258	0.420241623015942	0.24549137685282	0.176644803591682	0.200379921260673	-0.305429840375943	0.143338524794366	-0.370495460269155	-0.252997073238045	0.327209977930851	0.325627748816271	0.102294432671341	0.260726663591463	0.258995051418414	0.215209017097099	0.189037856779449	0.188747702788031	-0.186619683091924	-0.239994101269753	-0.205042507369377	-0.361434857331965	0.372716267090025	-0.369918753639504	0.253752788757472	0.200186571281273
KEGG_PATHOGENIC_ESCHERICHIA_COLI_INFECTION	-0.161375454533157	0.169110253128548	-0.149911818080894	-0.283157920162656	-0.157350186739947	-0.194490783388908	0.170711400328425	-0.386510676379894	0.469786053544362	0.181663707192902	-0.262380715534216	-0.369605311834191	-0.216967587241503	0.389012021572683	-0.370665683352915	-0.378126156090977	-0.286868798590942	-0.393901690960105	-0.369321815713032	0.249049231267318	0.202186222616417	-0.169899714552806	0.376147486283234	0.239345184629186	0.35424517558507	0.425662404143477	0.115431917158358	-0.179658871986445	0.247868629681016	-0.230823582627617	-0.149330607128126	-0.208758555350546	-0.253169740191246	0.343241132546783	0.378611019859285	0.134846236420729	0.426225422177827	-0.25283063933546	0.198385059347986	-0.146445401860278	-0.131694404151337	-0.213899621999855	-0.352497528987398	-0.158984192126616	-0.293101055708561	0.399425216524262	-0.240728151105445	0.348716621637502	0.277154236208149
KEGG_LEISHMANIA_INFECTION	-0.464655769593949	-0.406102612460617	-0.458265735785262	-0.430145283609784	-0.449927806218261	-0.471247122194265	-0.284284153414939	0.297178476966056	0.266169037677765	0.442308081858692	-0.280991605958257	0.214631186150712	-0.136401029375595	0.531946150335256	0.122853983957644	-0.217019618643355	0.10947728325902	0.150148003668999	-0.295812622018575	0.331558016387091	0.295894200999131	-0.178480788110126	0.490754160590878	0.411683826335542	0.466582696700265	0.646758747748028	-0.184253268983489	-0.409815045852578	0.461863415884358	0.441495990049584	-0.265584528147031	-0.41380587912131	-0.332939258824982	-0.406909781191502	0.338746098199034	0.159159205825919	-0.3818915527178	-0.433844909854328	0.320685202929462	0.283309949311306	0.456346267077906	0.236079125373481	-0.145939384659884	0.401919031211704	-0.182724820921738	0.212206174896394	0.225487936393327	-0.11762337134231	-0.327965306635405
KEGG_PATHWAYS_IN_CANCER	-0.251274958536913	-0.250839532260959	-0.202869502748031	-0.30556135259606	-0.263847572856637	-0.280828609649255	-0.172495068956136	0.152777627815513	0.196795158652343	0.148563780216106	-0.173351814954282	0.200795016867362	-0.239321481648934	0.191109270178301	0.124645721442437	0.177692185575605	0.211469511844964	0.200533964318625	-0.133223710529183	-0.15343118182638	0.123520347384094	-0.143345460084619	0.181878788716434	0.187721591085578	-0.172042525388131	0.245967453074142	-0.144131084096488	-0.221024857510551	0.151518799479379	0.218490330335048	-0.213765786421025	-0.185670663042207	-0.241307019298584	0.162095887245412	0.154924927922587	0.197633364581506	0.165542910810912	-0.165755640514974	0.183475900438426	0.222365556181995	0.336073453523938	0.226516840655188	0.137363173442847	0.23333751522226	0.156641329179501	0.176926819282265	0.233497155825882	0.154326192115927	-0.234784270243593
KEGG_COLORECTAL_CANCER	-0.296297678035681	-0.229369778605345	-0.134376311149869	-0.262897092495985	-0.230522861039283	-0.161007928530264	0.23129827777795	0.156700498530629	0.203454237116721	-0.22113649621862	-0.180150320309549	-0.225518180186567	-0.348319086755144	0.331009612586772	-0.302870299906345	0.168205114056329	-0.282974692922353	-0.175295391335421	0.170440127135223	0.356208535773095	0.142887710272484	-0.221177423179377	0.207430349205905	0.269976218234108	0.2477316384177	0.383698540273246	0.197884552247605	0.248124308821175	0.233183499359373	-0.285022597593556	-0.160335651943586	-0.166598107008138	-0.234449729840533	0.218973532482264	0.191918043723283	-0.217280870042543	0.279861786021393	0.39496942780552	0.296697469205378	0.239360452325446	0.206657079215382	0.184117549720954	0.182157203656417	-0.159373343825477	0.135734933506043	0.255184967569276	-0.230728620373505	-0.218573837135742	-0.250041226722872
KEGG_RENAL_CELL_CARCINOMA	0.164230534404772	0.182192019192803	0.254910331611661	-0.19569216683888	0.125071412361571	0.147400627795126	0.2216296024129	-0.229243251517954	0.31394169958665	-0.211843457679029	-0.239463264555358	-0.322032653710665	-0.270265469799342	0.321767376897476	-0.314800554171378	-0.19267567652961	-0.276921829990105	-0.200346112805649	-0.179875815655537	0.161546577269568	0.161830862882733	-0.311595368928962	0.166489767010622	0.270150627085523	0.294341151766572	0.419432869595443	0.143894663342465	-0.148413623924417	0.284277177256304	-0.334059013873646	0.201817312999655	-0.316185019731694	-0.292904150619811	0.259860305019721	0.275390615653968	-0.289135733357789	0.320169744901043	-0.196851243295777	0.200128468817421	0.243207487133418	0.263110566034799	0.224450875056286	-0.249602064535586	-0.135823284929306	-0.315061276684352	0.263043012247828	-0.339254073699591	-0.2063419035742	-0.193273800832451
KEGG_PANCREATIC_CANCER	-0.240138198527804	-0.18986164639592	-0.147126549731748	-0.31085769978156	-0.244476105336402	-0.26918925619384	0.236576441758999	-0.114913517849742	0.245124903564019	0.205775852022095	-0.23266629113011	-0.25749715152377	-0.219952514893325	0.380534762405156	-0.270588118571006	-0.216968461367356	-0.245090472294326	0.168936088524096	-0.239148673312172	0.291106598098853	0.20836227895123	-0.230632628048164	0.278885905485399	0.252666229910725	0.315215983645587	0.377326130928001	0.153154838266464	0.187967787230911	0.278892509879951	-0.238585864303766	0.197284594560483	-0.266582837785178	-0.361229009032405	0.203983319835431	0.329195343988943	-0.182117990743201	0.223588195053481	0.238763983480475	0.226686030315	0.22221363020097	0.201265934926128	0.206647850457601	-0.166129150252671	0.244443224994461	-0.234801238186137	0.284564975995207	-0.23463721493134	-0.209764878511711	-0.230335527179725
KEGG_ENDOMETRIAL_CANCER	-0.336649111774571	-0.295751776846279	-0.250823883717041	-0.2877487584827	-0.292950327362264	-0.281727395445881	0.260722214704676	0.182467553134756	-0.232013529403312	-0.232494997255502	0.272038940907831	-0.244983041298856	-0.310060851177258	0.29234958736744	-0.22746972117493	0.215423809594793	-0.213435704444001	0.163527805300731	0.237752970707853	0.413382625060763	0.143199542752091	-0.162578285185485	0.232388680985312	0.174151748268211	0.228106521598403	0.330813046793273	0.22644233749553	0.280336818938578	0.195988601331951	-0.332992789597034	0.254330620776394	-0.317417918877393	-0.283468607395605	-0.184366204996471	0.258368469056232	-0.240680602009622	0.250690026507142	0.409857458581818	0.273911952413544	0.295276333354697	0.160497363620758	0.185373610826575	0.135049849012848	0.196669124992794	-0.16749387540125	0.384512197854345	-0.223444752368204	-0.30962691041466	0.227071388996425
KEGG_GLIOMA	-0.196495670990903	-0.214729526040622	-0.206700465101488	-0.210504720255881	-0.225598231037807	0.210906735764339	-0.152584890794502	-0.153162969773361	0.199637790739782	0.185506806187347	0.226801742079863	-0.155044033983671	-0.244760804933235	0.261670698693342	-0.187173910201585	-0.219662545618167	-0.196919374369606	0.176514220688425	-0.227992381283607	0.188684917209801	-0.161616603110061	-0.174648277191194	0.236141192767346	0.190731709281834	0.221599448810734	0.29416666001102	0.142761573486525	-0.146058164531165	0.170510813492023	-0.211329226436631	0.145147863177568	-0.193063690167504	-0.249300047749	0.238877494279633	0.194902399333492	-0.199729502202475	0.205041083512195	0.16126547344266	-0.180970374219799	0.273328269098914	0.245978016842107	-0.180986829072503	-0.208363518688442	0.174124967063553	-0.176328865078937	-0.13149439303212	-0.218357135189466	0.206459042902441	-0.242504728327768
KEGG_PROSTATE_CANCER	-0.333449699150663	-0.306167190434735	-0.282513639239849	-0.30139960821941	-0.29646018061364	-0.274129576759196	0.215176787067373	0.184977241446304	0.180529049751943	-0.180598620616547	0.255877098281884	0.140185687054744	-0.208477633097922	0.343421155372835	-0.226712296740612	0.190321864329079	-0.19693985712115	0.182808919061909	0.192402134149743	0.244055502554737	0.171409570804666	-0.143893120573378	-0.144648780152953	0.129689208350943	0.260715233008521	0.340083618864968	0.279095266595129	0.241323350523398	0.197983481454456	-0.258369542518212	0.198938433164573	-0.296773195361021	-0.270264218146712	0.209095222521516	0.243895186403312	0.149388439296487	0.226833018411897	0.340492099187994	0.244185497429847	0.238305170779811	0.275672707837126	0.254910754210429	0.185113896478978	0.242150482447201	-0.156016757680155	0.288047441123188	-0.190358398684651	-0.1755928587788	-0.188833420673494
KEGG_THYROID_CANCER	-0.503445112071827	-0.489114099396318	-0.363879634382788	-0.445278665082088	-0.416338581365138	-0.394338522557617	-0.215994341795433	0.253366413920309	0.230338256644235	-0.218353746115999	0.263735661494139	-0.188096889622895	0.274853011702927	0.27819821486519	-0.212610900441861	0.261766748103372	-0.237172381414984	0.24526449777491	0.28058889005825	0.284133602283245	0.218177946874864	-0.228212566456402	-0.137704297570585	0.352431920260587	0.270174129454885	0.405639973751239	0.202166396090386	0.279557653133255	0.356693406497956	-0.407959663236918	0.281806937166819	-0.307577701155332	-0.326637673218828	0.149306466929048	0.283894401367524	0.194801126214527	0.276500379735941	0.430698867203629	0.231848052939907	0.325061596945604	0.158400050187014	0.292777244726099	-0.279541234251658	0.21373981162658	0.208955314511131	0.351153457688842	-0.279910810097271	0.20477201440604	-0.233820382100469
KEGG_BASAL_CELL_CARCINOMA	-0.313993213981846	-0.318907106838528	-0.357430982142204	-0.298962884078787	-0.32617228120796	-0.285140861582821	0.194172247735342	0.387692205674027	-0.386492467839787	-0.21658493149202	0.221163346276045	0.47309202889276	-0.322614059931526	-0.329804775172392	0.342526984335216	0.248315544063615	0.346504819216033	0.315386389514424	0.232109748800426	0.214339879167811	-0.247965505136998	-0.203292149399748	-0.176528521338854	0.234816137746739	-0.434781492630617	-0.227699193080569	0.27474536184012	-0.216749024434983	-0.230155797648273	0.275386390261122	-0.299827433584112	-0.179819274388845	-0.173196922712293	-0.161928226665915	-0.283581049942005	0.368682638935005	-0.1751395507545	-0.174646654252023	0.201554323008497	0.304013208312271	0.357851633854889	0.244877019731743	0.192598311311078	-0.167941140756147	0.48883824809056	0.162476170365773	0.492607191965563	0.201298571530866	0.261570475257142
KEGG_MELANOMA	-0.26220680491786	-0.271876101793971	-0.253666155701706	-0.334000845263196	-0.256010805484458	-0.293870693797839	-0.27779929368673	-0.201086848402245	-0.305357191106312	0.175002361986435	0.161139877038601	0.217909712669504	-0.293149983220687	-0.222404531149563	0.251902146102111	0.265174060797033	0.312774011361344	0.292629275478039	0.188279285293761	-0.232905777193845	-0.146746288926572	0.219501860900466	0.309579194047264	-0.225812521918404	-0.207511022472051	0.168540514733424	-0.155861863046967	-0.240361181336729	-0.212053684826097	0.293233233649986	-0.204035072956199	-0.163448112983966	0.212985361333873	0.179890000419201	-0.199310330237972	-0.170614095151117	-0.229379651053596	0.200427867842455	-0.285038792073396	0.315869486254218	0.317875390924562	0.313163328016246	0.187372598022201	0.308921306663336	0.181057837487022	-0.233968179348759	0.331524619659343	-0.249674841913893	-0.269000802924408
KEGG_BLADDER_CANCER	-0.282163791245907	-0.338277779631259	-0.225346752363847	-0.353864874979383	-0.288587052483948	-0.301247026356011	0.300925374566458	-0.244618571101584	0.223100676944043	-0.184045616459778	0.207073806244346	-0.224187311500285	-0.23690748753475	0.201031224245059	0.204597730710291	0.306334301015662	0.229111119629236	0.385978726475136	0.31793930449046	0.225670962084217	0.315247967493656	-0.234730313101799	0.216502081247184	0.196135186319161	0.26519132643954	0.320805483694293	0.162306187327111	0.312558485956409	-0.155071743137332	-0.257893726288253	0.26457690343724	-0.213166921292489	-0.318726377943498	-0.176991124419632	0.266957183065509	-0.192094921148699	0.226482740053358	-0.236501734012364	-0.163849080155214	0.341076707514872	0.235692976844169	0.36302103650255	0.189693440561875	0.298859459278808	-0.204078998296055	0.268625835791058	-0.271329983555498	0.276561011318488	0.363371341082167
KEGG_CHRONIC_MYELOID_LEUKEMIA	-0.183733493672946	0.200272404232019	0.145186956165907	-0.262371335591574	-0.204098436795953	-0.234790421926505	0.226222182125627	-0.135403724243469	0.265426020091058	0.206858945735454	-0.162697014974649	-0.266128882244248	-0.334992644793965	0.34295131221542	-0.269637310200189	0.208245450419695	-0.220585352353944	0.179824836523457	-0.205133923318769	0.21535919255397	0.187425431623524	-0.259495917050331	0.223998020933324	0.174798054005374	0.278104021198264	0.358628366573841	0.155492808639411	0.214323371919123	0.243382038320955	-0.24733835041161	0.178202009192088	-0.257915885385621	-0.289094126551273	0.23902335435599	0.196458913541879	-0.186614441308839	0.25236628119038	0.205052082589448	0.158624308857745	0.136897697276707	0.179635018341028	0.175233517562783	-0.208764405107828	0.142550773829183	-0.281924895623563	0.276410711831611	-0.296525588163262	0.24156966191531	0.220764074492187
KEGG_ACUTE_MYELOID_LEUKEMIA	-0.242087785138045	-0.220824849426634	-0.179914979008091	-0.249684960907785	-0.248395874897706	-0.214801707913418	-0.184767779627352	0.16986357985201	0.225739704356626	0.21468709750289	0.191223574807374	-0.255597228745845	-0.264077468092246	0.38083363160089	-0.299003806415671	0.163872794730115	-0.169633125559613	0.142058388411458	0.15160618257776	0.376882359059371	-0.162369551865122	-0.224636951742532	0.207137198863454	0.19064614460576	0.33505464863057	0.418823427540189	0.182066534460925	0.201758571939851	0.348822860081708	-0.279532437625671	-0.142559978404923	-0.316260170649882	-0.353438982092958	-0.222575203012006	0.185596431622906	-0.161446935044886	0.245949514706717	0.252182110985669	0.21487381614298	0.213628133966147	0.275401345105485	0.12627377741264	-0.130778927277361	0.25046872470979	-0.258286132618207	0.299056561522949	-0.251529818427484	-0.225548623062389	0.184839735099839
KEGG_SMALL_CELL_LUNG_CANCER	-0.211710155596248	-0.259184722178955	-0.210368646928782	-0.300385256969498	-0.256041673997733	-0.345791484424003	-0.168736843240621	0.246224328751497	0.330842112965108	-0.202875125606275	-0.265742450216619	0.171465412705505	-0.299226717274697	0.244256668848237	-0.130740567198619	0.218223868449211	0.192401809103618	0.18947035681437	-0.195927051816386	-0.224148465118179	0.16929951906401	-0.224102057413535	-0.237635401704914	0.222445608646433	-0.229671044155141	0.241082971911087	-0.162583135191397	-0.266663244028271	0.184254391393271	0.175773891614269	-0.160087176225432	-0.259330191926923	-0.284944360514828	0.25950015094801	0.23595572606469	0.295778866586395	0.222517785838073	0.147715943386462	0.203440670807857	0.173160501482965	0.337679968812737	0.208545185854308	0.169154959951939	0.317713604614461	-0.209844013992599	0.199031054523185	0.170729161624576	-0.163207713162422	-0.252697641073763
KEGG_NON_SMALL_CELL_LUNG_CANCER	-0.307904633071876	-0.316874115515523	-0.298994138162114	-0.276002762868087	-0.285569841065407	-0.265084205325463	0.150711568917526	-0.144905247497063	0.19714964919619	0.282891755759452	0.179196345675833	-0.203200152400229	-0.255801731465336	0.418024450864775	-0.251034086351571	-0.234034081470368	-0.322772519484719	-0.173777283128067	-0.198376589233672	0.284936653544778	-0.180186236656815	-0.206568311512882	0.320839345669672	0.193156054505163	0.344984085452024	0.389016025402543	-0.154645736406578	0.217114880437545	0.336664161514143	-0.277712770999592	0.206538492069093	-0.260592274704975	-0.274060042991073	0.144416828874562	0.329697159067839	-0.290310075781936	0.252090649843465	0.232986928289918	0.125601002572136	0.282124526223506	0.184035561042058	0.190562400694574	0.172578438565057	0.220650714156285	-0.3058587490904	0.253819797885936	-0.248372220796798	-0.333662558330639	-0.22821184431851
KEGG_ASTHMA	-0.695166767229295	-0.673106316515925	-0.68553387154555	-0.672132694062299	-0.6612979647855	-0.670694293496959	-0.506449838801903	0.444062564145303	-0.478577882170075	0.635801097214494	-0.279685506333166	0.512078311460824	0.449944285839866	0.592577195385621	0.403535707363556	-0.257647594869027	0.295875166993328	0.202521005532874	-0.37292820433784	-0.301017475166162	0.34626219375484	0.238221740827225	0.653294701230777	0.403796597041251	0.46953980664244	0.599455410041263	0.254735818031355	-0.634474979268877	0.580695443234302	0.697003669157447	-0.174043016976249	-0.23784151141958	-0.311771006989671	-0.598912420455641	0.501984895376611	0.402941919683859	-0.649801400935258	-0.43870495252578	0.311835626850743	0.504228346273829	0.597228727860966	-0.156694481817467	0.234222475446412	0.523585937615375	0.339733971149053	-0.251234200502816	0.543434491591381	-0.48672593519206	-0.555324436434545
KEGG_AUTOIMMUNE_THYROID_DISEASE	-0.662553388387629	-0.626986703910084	-0.768009764458058	-0.638173714364945	-0.652117943336651	-0.655396269109052	-0.552606250526039	0.411013815770937	-0.451697617996089	0.646338546014251	-0.395838837896429	0.406221609049367	0.218318307901848	0.446829445206343	0.401039865119764	-0.257062371123214	0.311828762463144	0.271093647565943	-0.452444790937504	-0.292874354161515	0.29667637641744	-0.204452177234947	0.635925084804795	0.370826662264189	0.386663109441142	0.629951494766557	-0.241462695722211	-0.601665139960757	0.525796118582666	0.703848141731989	-0.305887405169085	-0.332930677235756	-0.439206704940301	-0.61736494127585	0.515498862449862	0.292683247466741	-0.63175158613291	-0.642257816305679	0.301528672252411	0.446276537609343	0.516000295575705	-0.191696770035364	0.330744636577695	0.530371140083851	0.327012094322468	-0.160719252962625	0.560857541518526	-0.214059443110209	-0.562511927171526
KEGG_SYSTEMIC_LUPUS_ERYTHEMATOSUS	-0.590557066526072	-0.56383945874523	-0.628087827078555	-0.5942986622714	-0.603817568155414	-0.577206875704632	-0.380435125174575	0.335900581620484	-0.242465500883884	0.46174328856164	-0.162762228861963	0.389696123616795	0.546371458628067	0.45348278418683	0.294756517709293	-0.199827346806712	0.244727270576166	0.183870174600729	-0.291737026200642	-0.187160519657298	0.453262679732933	0.499143235594161	0.524492104858211	0.354027697816194	0.53008498699239	0.537102814334616	-0.172980659024567	-0.402188418658577	0.612199529203363	0.572238752742579	-0.208012300516211	-0.154432385146283	-0.212443733147461	-0.309158182618211	0.521300975305717	0.279299154880755	-0.500028952741977	-0.485552629415804	0.213437803833612	0.355589008887509	0.491698422378025	0.329584406055773	0.280355090918352	0.501004828435776	0.350075682871922	0.105232411912793	0.42514164018793	-0.150223347852525	-0.440299234156994
KEGG_ALLOGRAFT_REJECTION	-0.675959243384468	-0.630508829733571	-0.754740187297611	-0.690480967096094	-0.678563219630136	-0.676871829084585	-0.461570560361213	0.576388024821098	-0.345970158368526	0.658492810340709	-0.368728521239407	0.472459461821443	0.370933995960952	0.619026250868254	0.252204137897633	-0.413164480605902	0.259006962013961	-0.163888678609074	-0.534252618920465	0.232999464307138	0.402078667549895	0.183516022259339	0.659793901823925	0.539414268291885	0.584140514127424	0.717077796614614	-0.186746688904276	-0.589591317388123	0.696105589724183	0.735002820181334	-0.191931163989602	-0.447651990239802	-0.440901976342859	-0.601312051974665	0.636830795529641	0.365448313073247	-0.588851037407021	-0.670817143504804	0.392191057009159	0.420326512156286	0.596274120090749	-0.154448582697649	0.255168456659844	0.508440168890846	0.352775006647284	0.196874692088314	0.527749871789782	-0.263739041431135	-0.587961030849065
KEGG_GRAFT_VERSUS_HOST_DISEASE	-0.697473058190375	-0.674322752553673	-0.726757841134697	-0.754106477674484	-0.733251407275014	-0.706007500511568	-0.516393341620193	0.489692386819333	-0.303361728521861	0.655275698844066	-0.241246038266833	0.497452989601922	0.405145598486386	0.661206114963439	0.211194737136637	-0.488854207067194	0.180645826307366	-0.15183357865261	-0.566627588777908	0.284579805036124	0.485550306691636	0.252170171804505	0.646830036816961	0.564564067723349	0.659001504833565	0.764639744184872	-0.176385181424044	-0.5766681873688	0.685999811892716	0.718479495280549	-0.331274512911441	-0.406569900911156	-0.418904961310243	-0.60383417711678	0.610756315291696	0.243160465377494	-0.660372604696844	-0.652513487777407	0.318952606533433	0.447596940274302	0.607066240746153	0.185519439142801	0.244064902210494	0.584623778525717	0.370057548770246	0.23551990696837	0.468601697035812	-0.195822548707593	-0.597368000798413
KEGG_PRIMARY_IMMUNODEFICIENCY	-0.414399905202032	-0.463233803939031	-0.622884903363375	-0.549744387443368	-0.499180429222621	-0.48955949306497	-0.452266060645477	0.304911546855256	-0.246008841193442	0.669807587145089	-0.214875765992812	0.425372222202901	0.177795468574514	0.792373159042172	0.188829656576053	-0.218912354628006	0.133669937943101	-0.181200381073348	-0.332756611677931	0.341484151159953	0.228843353189914	-0.283325401312087	0.532576391364547	-0.119593656185222	0.641399764668732	0.727485181532785	-0.400049346825859	-0.470950752419642	0.78778152018234	0.631983505942192	-0.492197148046039	-0.213062223730908	-0.24129230594744	-0.472498487438369	0.536209992651756	-0.183496911920402	-0.44156390336463	-0.498958786724284	0.393368755764921	0.342657969052771	0.482936393582188	-0.134137821530645	-0.123277230866944	0.298547762409128	-0.156672847763707	0.316461081292212	0.39682574735283	-0.246292884205806	-0.430196414498336
KEGG_HYPERTROPHIC_CARDIOMYOPATHY_HCM	-0.274922143100916	-0.331194028711499	-0.242145264049501	-0.275182764656342	-0.279954441905619	-0.325151847446213	-0.304575728901829	0.245659372939159	0.192936291237557	0.222067683102917	-0.267591350615256	0.4140634579392	0.172256299436766	-0.316563997835066	0.385557584014955	0.271979003666371	0.468967282434108	0.31381786663549	0.203744533110109	-0.452766806040623	0.303177064229898	0.148046019171075	0.209268161912328	0.27628347814566	-0.364202522952982	-0.292825592228671	0.234063221327573	-0.403956494214354	-0.329594192020819	0.493642166899729	-0.247993124144237	0.211361808606309	0.219426415332336	-0.266550846697024	-0.259113583769682	0.356379689277422	-0.377677595745218	-0.391618309311605	-0.299968495557849	0.273051977153667	0.458456497115466	0.180652746440743	0.174200233449362	0.331193684494848	0.235130651477382	-0.280626900820636	0.460690520754647	-0.150040245674546	-0.258051130602545
KEGG_ARRHYTHMOGENIC_RIGHT_VENTRICULAR_CARDIOMYOPATHY_ARVC	-0.247808293007569	-0.282857267058652	-0.198339439193224	-0.289109864675373	-0.294238815985614	-0.313585395394736	-0.280577152855964	0.297713091111013	0.218310414523538	-0.243984190561194	-0.235420822875557	0.459178528179172	0.16897360401989	-0.3856384275569	0.396985762782835	0.220405813042395	0.463454688551936	0.265863577688952	0.120494590071706	-0.366076460181025	-0.195347284291209	0.204859897546342	-0.165064176967541	0.237122553960796	-0.438375891983508	-0.376904401951467	0.233040433391169	-0.330728645381968	-0.377471282817442	0.413487773576285	-0.311604383409252	0.286180677913479	0.239609560882139	-0.180193344389267	-0.2014799861036	0.361445012563268	-0.29955040063844	-0.266019520861706	-0.300130037843489	0.371761954943826	0.563538364425819	0.194864830876976	0.161519184002584	0.376617237490284	0.226393889913282	-0.207129881955427	0.522560115272086	0.161780013024681	-0.275695442019442
KEGG_DILATED_CARDIOMYOPATHY	-0.320098029324464	-0.325669157082166	-0.236802653274441	-0.285562588341942	-0.300304039523401	-0.343105237778147	-0.247791586958474	0.271961039183842	-0.217717594028628	0.25086976765659	-0.277495974258806	0.447961865937082	-0.201414430617016	-0.321505760418755	0.409090513058465	0.234776616380886	0.487761909849719	0.290653113325655	0.13250619226324	-0.450282464872636	0.272412944381992	0.142808034889226	0.223501978891205	0.259922086150578	-0.34811776958653	-0.303159299203808	0.224488810305698	-0.40991350914878	-0.320782041826764	0.522480504737875	-0.260957612042513	0.225884130393703	0.274052409434859	-0.243862133135729	-0.225203599723809	0.381506642382365	-0.374777467223688	-0.378745946537226	-0.295470228645532	0.251353042660794	0.486172734769571	-0.165011862960626	-0.146620127960958	0.256485969222739	0.198161606902557	-0.281261501556995	0.507536299975031	0.168564611282072	-0.225389475445621
KEGG_VIRAL_MYOCARDITIS	-0.47280369681666	-0.475594646696235	-0.518241248078443	-0.501776875966212	-0.486583342980763	-0.505027573587884	-0.254032738896157	0.39914812139768	-0.215181066144681	0.365288410096718	-0.272088038513068	0.385005395685844	0.254923169299148	0.343359065928238	0.202688088473283	-0.24335662839834	0.195451681528121	0.143177408619091	-0.320419684037122	-0.189178940934514	0.39076825890918	0.185016913362955	0.388444231228222	0.444379405835409	0.281398492174803	0.43584318521732	-0.162594201160764	-0.372961388819431	0.446198972884701	0.51289660369087	-0.256932722034667	-0.239656009789505	-0.29326786929362	-0.302367694558528	0.422347177053147	0.292640681380138	-0.384836384070815	-0.428374908366186	0.236846360026314	0.338055154916963	0.56240325734312	0.111142874052076	0.246771603156987	0.45263855341185	0.262923295702455	-0.164759460550786	0.331604761380656	0.206677554360561	-0.28563789639113
[truncated: 361 more columns]
